# Supplementary material for: Dynamics of venom composition across a complex life cycle
Source: eLife. 2018 Feb 9;7:e35014. doi: 10.7554/eLife.35014 (PMC5832418; doi:10.7554/eLife.35014)
Supplement: Supplementary file 1. — This file is related to Figure 1E-G. [file elife-35014-supp1.xlsx]

## Sheet: nCounter probes
		Gene	positions in gene	Sequence	Tm CP	Tm RP
		Ncol1	346-445	CCCGGAGCACCAGCTCCACCCGCTCCTCAATGCCCACCGATCTGTATCCATCACTGTATGAAGATCTGCCCCATGCCATGCTGCTCCCCACCACCACCCC	82	83
		Ncol3	16-115	ATCCTCGGAGTTTTGGCCTTGATGGTCGTCTCAACATACGCCCGGAGCACATACAAACGCAGCGCCAAGGCATGTCCACCGGGATGCCCTAACTACTGCG	84	89
		Ncol4	25-124	CTGGGGTGTGTACTCTACACTTCAACACTCACTTACGGGGCTAGTATGTTCAAATCATCATTACATCTGAAGAGAAGTCCCAACCCATGCGGAGGTAGTT	83	81
		Nematolysin_1b	1369-1468	AAGAGTAGCCGCAACATACGTCCATGGCAATGGCACGACATGACCTCCCGGTACCAGTACGCACAAAGCCTGATCAACCAGTTAGCCGACGAGCGGTTGT	83	82
		NEP14	222-321	TTGGAGTAACAAGACCTGCTTGAAGTTCATACCGCGTATACATGAGAATGCTTACATCGAGATCAAGAACGATAGGGAATGCCAAGCTACAGTTGGTTAC	80	82		NG=Nprmalizing gene
		NEP16	139-238	TAACTCGCCGCCCATGACCCTCAATGCAGAAATGTCCAAATCTGCAAAAGAGTACGCCGAGAAAATTGCAAAATCGGGAAAATTTACGCACTCCTCCAAG	82	81
		NEP3	171-270	GATGAGAACAGCTGCTTCAACAACCCCGACAAAGCGCGTAACGAGTGCCCCGTCAGCTGCAAGCTCTGCGTCAGCAAGCGCTCTAAGAAACAGAGTGACT	83	83
		NEP3_Like	162-261	ACAAGGCACGTATGGCATGTCCTGTCAGCTGCAAGCTTTGCGACAAAAAAACATTCCACAAGAAAAGCAAACTGAGCGATGTGGTAGTTGTTCGTGCGAT	82	81
		NEP4	283-382	AAAGACTGGGCCGACAACAGGAATGACTGTCTGCGCTTTCCTCAGTTCATGTCCACGGAATGCACCAAGTCCTGCAAACTCTGCGGAAAAGAAACCAATG	82	83
		NEP6	196-295	CACTGGATGTCAAGGACCTGTTTAAGGTTCAGTCCACGAAGAAGAGAACACGCATACATCGAGTTTCAATATGACGGGAGGTGCAGAGCCCGAGTTGGTT	82	82
		NEP8	166-265	AAAAAGTTGAACTACGCAGTGGGTAACTGCCCTTGGACGTGCAGATTCTGCAAGAAGGAGAACGGAGACTCGAAAAAGTGCAAGGATTTGGCAGGAGAAA	82	82
		NR2	396-495	CCCTTTCAACGCCTCAAACGAGAGGGACTCGCGGACAAAGTCAAGTTGAATCGAGAGTTCTTCCTTCCATTCAAAGACGAGACTGCAGCAAAAAGTCTCC	82	80
		Nv1	90-189	GTCCGATGATGAGCTTGACTTTCATTTGAGCAAACGCGGCATTCCTTGCGCTTGCGACAGCGATGGTCCTGACATCAGATCGGCATCTCTTTCGGGGATT	78	82
		NvePTx1	169-268	GGAAAGTATCAGAAGTGCACATCTAATTCCCAATGCTGCGACCAGAAAGACTACGCCAAAAGAAAGCTGAGATGTCTGACCCAGTGTGACGAAGGAGGAT	82	82
		NG1 (XM_001629766.1)	163-262	GACAACTGGTACAACCATAATCACCCAGCCAGCATCCACAGTCATAGTTAACGTTGTGTATAGGGAGTTCCCGCTGAGTATGGTCTGCTCGTTTTGCCAG	81	80
		NG2 (XM_001640487.1)	4214-4313	TCACTCATCCCGTGCCTCGATACGATAACTCAAGCGCGAATAGTAGTCCAGCTAGGCATAGGGATGTGGAGAATTGACTTCCTAGTGTCATTTCTCTGTA	83	80
		NG3 (XM_001625670.1)	1128-1227	TCATCATGTGGCTCTCTCCCATTGGCATCTGTAGTATTGTGGCAGCCAAGGTCGGCGAGATGGGGGATATTGTGGGTGTGCTCTCGATGGTTGGTTACTT	82	83
		NG4 (XM_001628650.1)	921-1020	CACGAATGAGACTGTATCAAATGGTGTTGATGCTGGCGATGAAGAAGACGAGTCCGATAAGTCTGAAATTAGCCAGGTTTACGAGATAGCCACACGCATG	82	81
		NG5 (XM_001624235.1)	632-731	CTGGACAGGTTAAAGGTTCTCTTACAGGTCCAGGCCTCATCAACCAACAGATTCGGCATTGTGTCAGGGTTCAAGATGATGTTACGAGAGGGAGGAATCA	82	81

## Sheet: Raw data
File Name			20150909_GEX-Yehu-1-9-9-15_01_01.RCC	20150909_GEX-Yehu-1-9-9-15_01_02.RCC	20150909_GEX-Yehu-1-9-9-15_01_03.RCC	20150909_GEX-Yehu-1-9-9-15_01_04.RCC	20150909_GEX-Yehu-1-9-9-15_01_05.RCC	20150909_GEX-Yehu-1-9-9-15_01_06.RCC	20150909_GEX-Yehu-1-9-9-15_01_07.RCC	20150909_GEX-Yehu-1-9-9-15_01_08.RCC	20150909_GEX-Yehu-1-9-9-15_01_09.RCC	20150909_GEX-Yehu-1-9-9-15_01_10.RCC	20150909_GEX-Yehu-1-9-9-15_01_11.RCC	20150909_GEX-Yehu-1-9-9-15_01_12.RCC	20150909_GEX-Yehu-2-9-9-15_01_01.RCC	20150909_GEX-Yehu-2-9-9-15_01_02.RCC	20150909_GEX-Yehu-2-9-9-15_01_03.RCC	20150909_GEX-Yehu-2-9-9-15_01_04.RCC	20150909_GEX-Yehu-2-9-9-15_01_05.RCC	20150909_GEX-Yehu-2-9-9-15_01_06.RCC	20150909_GEX-Yehu-2-9-9-15_01_07.RCC	20150909_GEX-Yehu-2-9-9-15_01_08.RCC	20150909_GEX-Yehu-2-9-9-15_01_09.RCC	20150909_GEX-Yehu-2-9-9-15_01_10.RCC	20150909_GEX-Yehu-2-9-9-15_01_11.RCC	20150909_GEX-Yehu-2-9-9-15_01_12.RCC	20150910_GEX-Yehu-3-10-9-15_01_01.RCC	20150910_GEX-Yehu-3-10-9-15_01_02.RCC	20150910_GEX-Yehu-3-10-9-15_01_03.RCC	20150910_GEX-Yehu-3-10-9-15_01_04.RCC	20150910_GEX-Yehu-3-10-9-15_01_05.RCC	20150910_GEX-Yehu-3-10-9-15_01_06.RCC	20150910_GEX-Yehu-3-10-9-15_01_07.RCC	20150910_GEX-Yehu-3-10-9-15_01_08.RCC	20150910_GEX-Yehu-3-10-9-15_01_09.RCC	20150910_GEX-Yehu-3-10-9-15_01_10.RCC	20150910_GEX-Yehu-3-10-9-15_01_11.RCC	20150910_GEX-Yehu-3-10-9-15_01_12.RCC	20150910_GEX-Yehu-4-10-9-15_01_01.RCC	20150910_GEX-Yehu-4-10-9-15_01_02.RCC	20150910_GEX-Yehu-4-10-9-15_01_03.RCC	20150910_GEX-Yehu-4-10-9-15_01_04.RCC	20150910_GEX-Yehu-4-10-9-15_01_05.RCC	20150910_GEX-Yehu-4-10-9-15_01_06.RCC	20150910_GEX-Yehu-4-10-9-15_01_07.RCC	20150910_GEX-Yehu-4-10-9-15_01_08.RCC	20150910_GEX-Yehu-4-10-9-15_01_09.RCC	20150910_GEX-Yehu-4-10-9-15_01_10.RCC	20150910_GEX-Yehu-4-10-9-15_01_11.RCC
Description			Unfert eggs	Unfert eggs	Unfert eggs	Blastula	Blastula	Blastula	Gastrula	Gastrula	Gastrula	2 days	2 days	2 days	4 days	4 days	4 days	6 days	6 days	6 days	10 days	10 days	10 days	2 month	2 month	2 month	4 month	4 month	4 month	Adult male	Adult male	Adult male	Adult female	Adult female	Adult female	Starved female	Starved female	Starved female	Female tentecles	Female tentecles	Female tentecles	Female pharynx	Female pharynx	Female pharynx	Female mesentary	Female mesentary	Female mesentary	Female physa	Female physa
Sample ID			1	1	1	1	1	1	1	1	1	1	1	1	1	1	1	1	1	1	1	1	1	1	1	1	1	1	1	1	1	1	1	1	1	1	1	1	1	1	1	1	1	1	1	1	1	1	1
Owner
Sample Date			2015-09-09	2015-09-09	2015-09-09	2015-09-09	2015-09-09	2015-09-09	2015-09-09	2015-09-09	2015-09-09	2015-09-09	2015-09-09	2015-09-09	2015-09-09	2015-09-09	2015-09-09	2015-09-09	2015-09-09	2015-09-09	2015-09-09	2015-09-09	2015-09-09	2015-09-09	2015-09-09	2015-09-09	2015-10-09	2015-10-09	2015-10-09	2015-10-09	2015-10-09	2015-10-09	2015-10-09	2015-10-09	2015-10-09	2015-10-09	2015-10-09	2015-10-09	2015-10-09	2015-10-09	2015-10-09	2015-10-09	2015-10-09	2015-10-09	2015-10-09	2015-10-09	2015-10-09	2015-10-09	2015-10-09
File Version			1.7	1.7	1.7	1.7	1.7	1.7	1.7	1.7	1.7	1.7	1.7	1.7	1.7	1.7	1.7	1.7	1.7	1.7	1.7	1.7	1.7	1.7	1.7	1.7	1.7	1.7	1.7	1.7	1.7	1.7	1.7	1.7	1.7	1.7	1.7	1.7	1.7	1.7	1.7	1.7	1.7	1.7	1.7	1.7	1.7	1.7	1.7
Gene RLF			YEHU_C3848	YEHU_C3848	YEHU_C3848	YEHU_C3848	YEHU_C3848	YEHU_C3848	YEHU_C3848	YEHU_C3848	YEHU_C3848	YEHU_C3848	YEHU_C3848	YEHU_C3848	YEHU_C3848	YEHU_C3848	YEHU_C3848	YEHU_C3848	YEHU_C3848	YEHU_C3848	YEHU_C3848	YEHU_C3848	YEHU_C3848	YEHU_C3848	YEHU_C3848	YEHU_C3848	YEHU_C3848	YEHU_C3848	YEHU_C3848	YEHU_C3848	YEHU_C3848	YEHU_C3848	YEHU_C3848	YEHU_C3848	YEHU_C3848	YEHU_C3848	YEHU_C3848	YEHU_C3848	YEHU_C3848	YEHU_C3848	YEHU_C3848	YEHU_C3848	YEHU_C3848	YEHU_C3848	YEHU_C3848	YEHU_C3848	YEHU_C3848	YEHU_C3848	YEHU_C3848
Comments
Lane ID			1	2	3	4	5	6	7	8	9	10	11	12	1	2	3	4	5	6	7	8	9	10	11	12	1	2	3	4	5	6	7	8	9	10	11	12	1	2	3	4	5	6	7	8	9	10	11
FOV Count			555	555	555	555	555	555	555	555	555	555	555	555	555	555	555	555	555	555	555	555	555	555	555	555	555	555	555	555	555	555	555	555	555	555	555	555	555	555	555	555	555	555	555	555	555	555	555
FOV Counted			547	544	545	550	547	550	546	548	547	531	553	552	534	538	529	528	525	506	533	528	528	532	511	522	551	554	555	545	550	554	548	553	554	548	543	544	548	548	539	546	543	541	540	540	544	542	545
Scanner ID			1410C0218	1410C0218	1410C0218	1410C0218	1410C0218	1410C0218	1410C0218	1410C0218	1410C0218	1410C0218	1410C0218	1410C0218	1410C0218	1410C0218	1410C0218	1410C0218	1410C0218	1410C0218	1410C0218	1410C0218	1410C0218	1410C0218	1410C0218	1410C0218	1410C0218	1410C0218	1410C0218	1410C0218	1410C0218	1410C0218	1410C0218	1410C0218	1410C0218	1410C0218	1410C0218	1410C0218	1410C0218	1410C0218	1410C0218	1410C0218	1410C0218	1410C0218	1410C0218	1410C0218	1410C0218	1410C0218	1410C0218
Stage Position			1	1	1	1	1	1	1	1	1	1	1	1	2	2	2	2	2	2	2	2	2	2	2	2	1	1	1	1	1	1	1	1	1	1	1	1	2	2	2	2	2	2	2	2	2	2	2
Binding Density			0.28	0.29	0.26	0.28	0.24	0.23	0.36	0.29	0.31	0.42	0.57	0.53	0.38	0.4	0.52	0.51	0.49	0.48	0.42	0.49	0.76	0.54	0.57	0.62	0.32	0.25	0.29	0.37	0.64	0.29	0.29	0.4	0.36	0.28	0.26	0.23	0.34	0.31	0.38	0.33	0.33	0.28	0.26	0.27	0.28	0.29	0.47
Negative	NEG_A	ERCC_00096.1	11	14	16	8	11	5	20	19	16	41	52	74	46	44	48	63	44	41	53	50	97	45	35	18	23	13	21	20	18	8	22	21	12	19	14	15	47	31	56	29	25	16	14	16	16	19	9
Negative	NEG_B	ERCC_00041.1	7	4	6	3	3	2	6	13	5	8	10	5	12	12	8	4	8	4	8	14	11	59	69	74	16	9	10	31	78	22	14	36	41	16	16	14	7	4	8	14	23	13	9	7	11	21	45
Negative	NEG_C	ERCC_00019.1	8	8	7	10	11	8	5	12	9	12	18	21	9	11	14	6	11	10	7	11	17	2	3	4	2	2	3	1	1	2	4	5	1	1	3	6	2	1	6	3	1	2	1	4	2	2	4
Negative	NEG_D	ERCC_00076.1	9	5	4	4	4	3	10	4	11	18	21	18	7	9	19	15	8	10	10	16	34	6	10	7	4	2	5	6	3	3	3	9	5	10	3	5	11	6	8	4	11	2	4	6	4	2	1
Negative	NEG_E	ERCC_00098.1	12	18	23	19	11	18	12	16	26	23	33	46	25	17	45	46	29	16	32	36	53	29	24	23	24	11	35	18	18	8	15	18	17	24	13	15	39	31	47	20	19	11	13	17	14	18	10
Negative	NEG_F	ERCC_00126.1	7	13	14	13	12	12	12	12	21	14	17	20	7	16	12	14	8	10	5	11	15	44	53	43	25	8	22	34	50	23	29	26	24	19	15	12	13	22	17	16	16	8	17	14	16	15	27
Negative	NEG_G	ERCC_00144.1	3	4	1	3	2	1	7	5	9	4	9	19	7	4	12	7	6	11	2	6	13	7	4	4	3	1	4	1	4	2	2	1	1	1	2	3	1	1	3	3	2	1	3	1	2	1	3
Negative	NEG_H	ERCC_00154.1	2	3	2	5	3	1	7	6	11	9	16	16	9	10	8	6	11	7	9	10	17	8	8	2	1	1	3	3	4	5	8	1	1	2	2	1	5	4	4	1	1	2	3	1	1	1	2
Positive	POS_A	ERCC_00117.1	46863	54205	63182	57291	43535	41363	42702	40537	55116	52837	52661	44734	61683	70461	52803	45588	42988	32945	43599	49383	41891	42888	49145	44883	57684	47725	55343	48598	48687	33785	45983	53993	45223	55479	54727	55554	56361	48833	60930	59894	58256	43408	39063	48657	49904	46213	40198
Positive	POS_B	ERCC_00112.1	11731	12685	14365	13684	9924	9722	10031	9657	13031	12447	12218	10606	13722	15775	11812	10044	9659	7492	9923	11445	9834	10066	11302	10208	13256	11247	13029	11326	11591	7752	11012	12604	10584	13315	12853	13043	12916	11592	14084	13833	13579	9910	9157	11185	11652	10557	9279
Positive	POS_C	ERCC_00002.1	3365	3526	4287	3856	2922	2805	2867	2755	3641	3539	3534	3025	3800	4376	3309	2993	2828	2007	2801	3118	2688	2882	3201	2936	3860	2723	3730	3335	3449	2376	3394	3592	3074	3862	3717	3835	3645	3182	3912	4028	3738	2887	2596	3278	3240	3001	2593
Positive	POS_D	ERCC_00092.1	874	935	1090	1035	754	759	712	705	975	960	999	803	1051	1200	887	747	770	572	782	812	753	776	855	771	986	802	956	836	884	570	836	953	789	953	940	912	932	798	996	1055	1011	729	634	855	836	795	725
Positive	POS_E	ERCC_00035.1	146	213	244	200	153	137	137	145	207	185	167	161	233	277	179	182	160	126	178	187	143	165	207	191	204	183	221	178	200	131	174	206	208	185	183	220	223	189	233	205	214	143	147	157	191	170	175
Positive	POS_F	ERCC_00034.1	64	85	117	80	70	62	64	60	88	73	104	101	105	112	75	72	55	49	83	83	64	75	76	62	91	44	82	78	61	47	67	87	56	83	87	89	97	96	104	91	81	52	58	74	97	80	65
Endogenous	HKG1	Yehu_HKG1.1	3239	3356	1620	3334	2249	1549	5507	3480	2950	4482	6879	6493	3532	3668	3550	8225	4163	3333	4053	5999	9939	7081	6620	5549	5951	2998	6168	5531	13921	3153	6569	5835	5029	6797	5413	3647	5432	4149	5933	10487	8619	6533	4975	4485	4316	5758	6852
Endogenous	HKG2	Yehu_HKG2.1	2376	2873	2525	3235	2431	1818	4176	3460	3597	2818	3154	2799	2282	2258	1881	3931	2803	1917	2171	2966	5491	2490	2191	1726	3362	1657	2509	2065	3908	1216	2141	2484	1975	2342	1700	1549	2758	2055	3444	3857	3131	2266	1515	1525	1353	1197	1793
Endogenous	HKG3	Yehu_HKG3.1	2866	3120	3021	3757	2781	1699	8708	6637	6614	4270	5399	5184	3111	3306	2875	7644	3811	2853	5191	6619	10634	2647	2673	2256	3756	1747	3576	1516	3169	881	1668	1957	1490	2081	1619	1140	4713	3347	5777	4613	3582	2592	1124	1215	1015	1167	1436
Endogenous	HKG4	Yehu_HKG4.1	7729	8455	7033	10269	7357	5483	16870	13258	11906	11767	14083	12537	9315	9797	9797	17032	11313	8376	10267	14295	26104	12176	10440	9871	13184	7088	11489	8447	17155	4920	8084	7964	6714	10326	7606	5293	12718	9697	16640	13642	10985	8071	6151	6451	5306	6385	8090
Endogenous	HKG5	Yehu_HKG5.1	1689	2053	1539	1811	1163	989	3118	2211	2036	2224	2912	2711	1610	1643	1916	4568	2113	1903	2588	3178	6014	1376	1220	1198	1482	788	1487	1307	2482	673	1193	1253	1040	1287	1013	669	1905	1455	2494	1969	1463	1097	820	842	687	775	948
Messages
Endogenous	NEP14	Yehu_NEP14.1	17	18	10	8	7	7	26	12	19	49	79	153	31	31	77	91	57	84	52	90	158	1989	1456	1305	846	569	719	580	1275	268	1839	1804	1160	916	606	424	925	693	557	4170	2788	2228	811	676	741	17	53
Endogenous	NEP16	Yehu_NEP16.1	1140	797	1024	1454	907	486	170	135	138	2649	4728	4713	1822	1829	3618	2455	2308	2764	2810	3447	7137	420	385	400	173	137	110	842	1635	490	465	453	363	480	360	151	324	173	277	366	580	301	288	255	258	475	535
Endogenous	NEP3	Yehu_NEP3.1	4	22	14	3	9	22	360	269	230	20161	30347	28869	23693	21694	50702	66322	23961	31450	51893	58337	106757	12791	13404	10917	6107	5504	7775	3663	5835	2059	5185	6445	3990	5059	3907	2654	18836	13759	24187	10766	9057	6307	2909	3527	3140	5499	4706
Endogenous	NEP3_Like	Yehu_NEP3L.1	36	31	15	20	23	37	6522	3102	3397	31657	58614	53074	26535	23406	54708	51346	33094	40205	50722	60830	116866	12557	11659	9482	4387	3655	5247	2933	5103	1653	4837	5779	3788	3258	2292	1616	9933	7071	9259	9664	8623	5863	2704	2940	2704	6253	5088
Endogenous	NEP4	Yehu_NEP4.1	36	46	99	31	22	65	12551	7962	9596	54272	75282	69224	37537	35809	57657	43366	50772	44873	43973	49900	104161	16423	14237	12040	5795	4353	6399	3216	5357	1854	5640	6942	4226	3055	2095	1593	13630	10024	14088	10623	9034	6300	3381	3619	3203	5466	4338
Endogenous	NEP6	Yehu_NEP6.1	1	20	9	4	5	15	116	54	63	5272	13362	13162	4576	4582	13253	7693	7972	10367	4542	7060	13971	9347	6116	7102	1992	1737	1688	1558	3436	878	3370	2396	2277	2663	1822	836	350	242	248	2210	2733	1705	1096	989	1097	833	1333
Endogenous	NEP8	Yehu_NEP8.1	12	13	16	15	9	10	12	8	8	24	32	25	65	38	204	431	33	79	123	241	345	1217	1345	963	363	365	668	256	435	129	304	296	204	293	170	154	342	189	274	1330	976	702	220	230	181	27	97
Endogenous	NR2	Yehu_NR2.1	71	65	28	37	44	37	4206	2334	2726	4647	7410	6911	2974	2907	4496	3974	4313	3714	3443	4162	7656	1797	1603	1309	1532	1113	1746	1396	2733	841	752	1435	887	608	582	554	6255	4491	7073	1043	798	596	304	327	276	441	372
Endogenous	Ncol1	Yehu_Ncol1.1	12	24	12	3	5	30	1079	496	465	13291	28090	30990	12861	11469	40730	26726	18297	26828	27284	43247	83067	10944	8824	7995	4066	3502	4489	2488	3830	1497	3403	4994	2943	3089	2135	1356	11928	8462	10678	10989	9026	6525	2325	2416	2329	3830	3151
Endogenous	Ncol3	Yehu_Ncol3.1	9	19	28	13	11	48	38310	19867	22772	77043	114698	107417	47513	47330	66310	64712	62810	57254	46879	61754	120752	26761	20995	18367	29957	21301	29685	8544	12032	6373	9892	21608	10335	9620	9898	8374	118619	89320	143025	11948	8108	6431	3069	3667	2813	5208	3577
Endogenous	Ncol4	Yehu_Ncol4.1	23	21	28	31	28	35	1720	580	536	15691	35742	37749	9563	8561	28175	16376	17921	23997	17111	26596	51948	5718	4414	4096	1982	1639	2249	1352	2312	820	2249	2984	1962	1359	1036	652	5510	3912	4416	5016	3972	2915	1216	1224	1229	1803	1617
Endogenous	Nematolysin_1b	Yehu_Nematsn1b.1	5	31	9	10	6	13	902	527	612	801	1303	2349	2237	2023	3432	5208	1950	2792	7900	11004	19945	18965	15144	14006	29247	18126	31061	12404	29052	6310	13158	6644	6596	12428	10709	6729	2171	1921	2024	5108	6541	3832	11972	13016	9745	1229	2152
Endogenous	Nv1	Yehu_Nv1.1	198	66	59	216	155	46	7631	5557	4054	3493	5388	4267	408	812	602	1713	8633	2865	883	2201	2481	351925	358388	497311	154318	53222	74416	262616	615676	178647	130518	318705	295548	83632	70781	48868	9070	8257	6708	62184	101630	53972	3455	6555	37313	69725	418257
Endogenous	NvePTx1	Yehu_NvePTx1.1	124311	114502	58588	64689	53857	47674	88259	50159	63731	85378	157807	126285	34684	36575	25513	2864	69668	38499	7490	3831	18978	77	78	78	42	16	267	33	75	14	23831	16971	15759	20314	12907	5705	35	23	36	708	390	367	10736	9890	10530	19	57
[truncated: 1 more columns]

## Sheet: Normalized data
File Name			20150909_GEX-Yehu-1-9-9-15_01_01.RCC	20150909_GEX-Yehu-1-9-9-15_01_02.RCC	20150909_GEX-Yehu-1-9-9-15_01_03.RCC	20150909_GEX-Yehu-1-9-9-15_01_04.RCC	20150909_GEX-Yehu-1-9-9-15_01_05.RCC	20150909_GEX-Yehu-1-9-9-15_01_06.RCC	20150909_GEX-Yehu-1-9-9-15_01_07.RCC	20150909_GEX-Yehu-1-9-9-15_01_08.RCC	20150909_GEX-Yehu-1-9-9-15_01_09.RCC	20150909_GEX-Yehu-1-9-9-15_01_10.RCC	20150909_GEX-Yehu-1-9-9-15_01_11.RCC	20150909_GEX-Yehu-1-9-9-15_01_12.RCC	20150909_GEX-Yehu-2-9-9-15_01_01.RCC	20150909_GEX-Yehu-2-9-9-15_01_02.RCC	20150909_GEX-Yehu-2-9-9-15_01_03.RCC	20150909_GEX-Yehu-2-9-9-15_01_04.RCC	20150909_GEX-Yehu-2-9-9-15_01_05.RCC	20150909_GEX-Yehu-2-9-9-15_01_06.RCC	20150909_GEX-Yehu-2-9-9-15_01_07.RCC	20150909_GEX-Yehu-2-9-9-15_01_08.RCC	20150909_GEX-Yehu-2-9-9-15_01_09.RCC	20150909_GEX-Yehu-2-9-9-15_01_10.RCC	20150909_GEX-Yehu-2-9-9-15_01_11.RCC	20150909_GEX-Yehu-2-9-9-15_01_12.RCC	20150910_GEX-Yehu-3-10-9-15_01_01.RCC	20150910_GEX-Yehu-3-10-9-15_01_02.RCC	20150910_GEX-Yehu-3-10-9-15_01_03.RCC	20150910_GEX-Yehu-3-10-9-15_01_04.RCC	20150910_GEX-Yehu-3-10-9-15_01_05.RCC	20150910_GEX-Yehu-3-10-9-15_01_06.RCC	20150910_GEX-Yehu-3-10-9-15_01_07.RCC	20150910_GEX-Yehu-3-10-9-15_01_08.RCC	20150910_GEX-Yehu-3-10-9-15_01_09.RCC	20150910_GEX-Yehu-3-10-9-15_01_10.RCC	20150910_GEX-Yehu-3-10-9-15_01_11.RCC	20150910_GEX-Yehu-3-10-9-15_01_12.RCC	20150910_GEX-Yehu-4-10-9-15_01_01.RCC	20150910_GEX-Yehu-4-10-9-15_01_02.RCC	20150910_GEX-Yehu-4-10-9-15_01_03.RCC	20150910_GEX-Yehu-4-10-9-15_01_04.RCC	20150910_GEX-Yehu-4-10-9-15_01_05.RCC	20150910_GEX-Yehu-4-10-9-15_01_06.RCC	20150910_GEX-Yehu-4-10-9-15_01_07.RCC	20150910_GEX-Yehu-4-10-9-15_01_08.RCC	20150910_GEX-Yehu-4-10-9-15_01_09.RCC	20150910_GEX-Yehu-4-10-9-15_01_10.RCC	20150910_GEX-Yehu-4-10-9-15_01_11.RCC
Description			Unfert eggs	Unfert eggs	Unfert eggs	Blastula	Blastula	Blastula	Gastrula	Gastrula	Gastrula	2 days	2 days	2 days	4 days	4 days	4 days	6 days	6 days	6 days	10 days	10 days	10 days	2 month	2 month	2 month	4 month	4 month	4 month	Adult male	Adult male	Adult male	Adult female	Adult female	Adult female	Starved female	Starved female	Starved female	Female tentecles	Female tentecles	Female tentecles	Female pharynx	Female pharynx	Female pharynx	Female mesentary	Female mesentary	Female mesentary	Female physa	Female physa
Sample ID			1	1	1	1	1	1	1	1	1	1	1	1	1	1	1	1	1	1	1	1	1	1	1	1	1	1	1	1	1	1	1	1	1	1	1	1	1	1	1	1	1	1	1	1	1	1	1
Owner
Sample Date			2015-09-09	2015-09-09	2015-09-09	2015-09-09	2015-09-09	2015-09-09	2015-09-09	2015-09-09	2015-09-09	2015-09-09	2015-09-09	2015-09-09	2015-09-09	2015-09-09	2015-09-09	2015-09-09	2015-09-09	2015-09-09	2015-09-09	2015-09-09	2015-09-09	2015-09-09	2015-09-09	2015-09-09	2015-10-09	2015-10-09	2015-10-09	2015-10-09	2015-10-09	2015-10-09	2015-10-09	2015-10-09	2015-10-09	2015-10-09	2015-10-09	2015-10-09	2015-10-09	2015-10-09	2015-10-09	2015-10-09	2015-10-09	2015-10-09	2015-10-09	2015-10-09	2015-10-09	2015-10-09	2015-10-09
File Version			1.7	1.7	1.7	1.7	1.7	1.7	1.7	1.7	1.7	1.7	1.7	1.7	1.7	1.7	1.7	1.7	1.7	1.7	1.7	1.7	1.7	1.7	1.7	1.7	1.7	1.7	1.7	1.7	1.7	1.7	1.7	1.7	1.7	1.7	1.7	1.7	1.7	1.7	1.7	1.7	1.7	1.7	1.7	1.7	1.7	1.7	1.7
Gene RLF			YEHU_C3848	YEHU_C3848	YEHU_C3848	YEHU_C3848	YEHU_C3848	YEHU_C3848	YEHU_C3848	YEHU_C3848	YEHU_C3848	YEHU_C3848	YEHU_C3848	YEHU_C3848	YEHU_C3848	YEHU_C3848	YEHU_C3848	YEHU_C3848	YEHU_C3848	YEHU_C3848	YEHU_C3848	YEHU_C3848	YEHU_C3848	YEHU_C3848	YEHU_C3848	YEHU_C3848	YEHU_C3848	YEHU_C3848	YEHU_C3848	YEHU_C3848	YEHU_C3848	YEHU_C3848	YEHU_C3848	YEHU_C3848	YEHU_C3848	YEHU_C3848	YEHU_C3848	YEHU_C3848	YEHU_C3848	YEHU_C3848	YEHU_C3848	YEHU_C3848	YEHU_C3848	YEHU_C3848	YEHU_C3848	YEHU_C3848	YEHU_C3848	YEHU_C3848	YEHU_C3848
Comments
Lane ID			1	2	3	4	5	6	7	8	9	10	11	12	1	2	3	4	5	6	7	8	9	10	11	12	1	2	3	4	5	6	7	8	9	10	11	12	1	2	3	4	5	6	7	8	9	10	11
FOV Count			555	555	555	555	555	555	555	555	555	555	555	555	555	555	555	555	555	555	555	555	555	555	555	555	555	555	555	555	555	555	555	555	555	555	555	555	555	555	555	555	555	555	555	555	555	555	555
FOV Counted			547	544	545	550	547	550	546	548	547	531	553	552	534	538	529	528	525	506	533	528	528	532	511	522	551	554	555	545	550	554	548	553	554	548	543	544	548	548	539	546	543	541	540	540	544	542	545
Scanner ID			1410C0218	1410C0218	1410C0218	1410C0218	1410C0218	1410C0218	1410C0218	1410C0218	1410C0218	1410C0218	1410C0218	1410C0218	1410C0218	1410C0218	1410C0218	1410C0218	1410C0218	1410C0218	1410C0218	1410C0218	1410C0218	1410C0218	1410C0218	1410C0218	1410C0218	1410C0218	1410C0218	1410C0218	1410C0218	1410C0218	1410C0218	1410C0218	1410C0218	1410C0218	1410C0218	1410C0218	1410C0218	1410C0218	1410C0218	1410C0218	1410C0218	1410C0218	1410C0218	1410C0218	1410C0218	1410C0218	1410C0218
Stage Position			1	1	1	1	1	1	1	1	1	1	1	1	2	2	2	2	2	2	2	2	2	2	2	2	1	1	1	1	1	1	1	1	1	1	1	1	2	2	2	2	2	2	2	2	2	2	2
Binding Density			0.28	0.29	0.26	0.28	0.24	0.23	0.36	0.29	0.31	0.42	0.57	0.53	0.38	0.4	0.52	0.51	0.49	0.48	0.42	0.49	0.76	0.54	0.57	0.62	0.32	0.25	0.29	0.37	0.64	0.29	0.29	0.4	0.36	0.28	0.26	0.23	0.34	0.31	0.38	0.33	0.33	0.28	0.26	0.27	0.28	0.29	0.47
Negative	NEG_A	ERCC_00096.1	4.61	6.92	9.98	1.41	5.28	1.12	11.02	9.47	4.01	27.99	33.16	52.91	34.17	31.57	31.58	50.45	31.85	30.08	43.19	34.75	73.05	30.22	19.73	6.55	16.07	9.23	12.43	12.85	8.61	1.89	13.56	13.05	6.37	12.61	8.05	8.45	38.91	24.86	45.05	22.18	18.35	11.58	8.37	10.68	10.69	13.94	2.66
Negative	NEG_B	ERCC_00041.1	1	1	1	1	1	1	1	3.47	1	1	1	1	1	1	1	1	1	1	1	1	1	44.22	53.73	62.55	9.07	5.23	1.43	23.85	68.61	15.89	5.56	28.05	35.37	9.61	10.05	7.45	1	1	1	7.18	16.35	8.58	3.37	1.68	5.69	15.94	38.66
Negative	NEG_C	ERCC_00019.1	1.61	1	1	3.41	5.28	4.12	1	2.47	1	1	1	1	1	1	1	1	1	1	1	1	1	1	1	1	1	1	1	1	1	1	1	1	1	1	1	1	1	1	1	1	1	1	1	1	1	1	1
Negative	NEG_D	ERCC_00076.1	2.61	1	1	1	1	1	1.02	1	1	4.99	2.16	1	1	1	2.58	2.45	1	1	1	1	10.05	1	1	1	1	1	1	1	1	1	1	1.05	1	3.61	1	1	2.91	1	1	1	4.35	1	1	1	1	1	1
Negative	NEG_E	ERCC_00098.1	5.61	10.92	16.98	12.41	5.28	14.12	3.02	6.47	14.01	9.99	14.16	24.91	13.17	4.57	28.58	33.45	16.85	5.08	22.19	20.75	29.05	14.22	8.73	11.55	17.07	7.23	26.43	10.85	8.61	1.89	6.56	10.05	11.37	17.61	7.05	8.45	30.91	24.86	36.05	13.18	12.35	6.58	7.37	11.68	8.69	12.94	3.66
Negative	NEG_F	ERCC_00126.1	1	5.92	7.98	6.41	6.28	8.12	3.02	2.47	9.01	1	1	1	1	3.57	1	1.45	1	1	1	1	1	29.22	37.73	31.55	18.07	4.23	13.43	26.85	40.61	16.89	20.56	18.05	18.37	12.61	9.05	5.45	4.91	15.86	6.05	9.18	9.35	3.58	11.37	8.68	10.69	9.94	20.66
Negative	NEG_G	ERCC_00144.1	1	1	1	1	1	1	1	1	1	1	1	1	1	1	1	1	1	1	1	1	1	1	1	1	1	1	1	1	1	1	1	1	1	1	1	1	1	1	1	1	1	1	1	1	1	1	1
Negative	NEG_H	ERCC_00154.1	1	1	1	1	1	1	1	1	1	1	1	1	1	1	1	1	1	1	1	1	1	1	1	1	1	1	1	1	1	1	1	1	1	1	1	1	1	1	1	1	1	1	1	1	1	1	1
Positive	POS_A	ERCC_00117.1	46856.6	54197.9	63176	57284.4	43529.3	41359.1	42693	40527.5	55104	52824	52642.2	44712.9	61671.2	70448.6	52786.6	45575.4	42975.8	32934.1	43589.2	49367.8	41867.1	42873.2	49129.7	44871.6	57677.1	47721.2	55334.4	48590.8	48677.6	33778.9	45974.6	53985.1	45217.4	55472.6	54721.1	55547.4	56352.9	48826.9	60919.1	59887.2	58249.3	43403.6	39057.4	48651.7	49898.7	46207.9	40191.7
Positive	POS_B	ERCC_00112.1	11724.6	12677.9	14359	13677.4	9918.28	9718.12	10022	9647.47	13019	12434	12199.2	10584.9	13710.2	15762.6	11795.6	10031.5	9646.85	7481.08	9913.19	11429.8	9810.05	10051.2	11286.7	10196.5	13249.1	11243.2	13020.4	11318.9	11581.6	7745.89	11003.6	12596	10578.4	13308.6	12847	13036.5	12907.9	11585.9	14073	13826.2	13572.4	9905.58	9151.38	11179.7	11646.7	10551.9	9272.66
Positive	POS_C	ERCC_00002.1	3358.61	3518.92	4280.98	3849.41	2916.28	2801.12	2858.02	2745.47	3629.01	3525.99	3515.16	3003.91	3788.17	4363.57	3292.58	2980.45	2815.85	1996.08	2791.19	3102.75	2664.05	2867.22	3185.73	2924.55	3853.07	2719.23	3721.43	3327.85	3439.61	2369.89	3385.56	3584.05	3068.37	3855.61	3711.05	3828.45	3636.91	3175.86	3901.05	4021.18	3731.35	2882.58	2590.37	3272.68	3234.69	2995.94	2586.66
Positive	POS_D	ERCC_00092.1	867.61	927.92	1083.98	1028.41	748.28	755.12	703.02	695.47	963.01	946.99	980.16	781.91	1039.17	1187.57	870.58	734.45	757.85	561.08	772.19	796.75	729.05	761.22	839.73	759.55	979.07	798.23	947.43	828.85	874.61	563.89	827.56	945.05	783.37	946.61	934.05	905.45	923.91	791.86	985.05	1048.18	1004.35	724.58	628.37	849.68	830.69	789.94	718.66
Positive	POS_E	ERCC_00035.1	139.61	205.92	237.98	193.41	147.28	133.12	128.02	135.47	195.01	171.99	148.16	139.91	221.17	264.57	162.58	169.45	147.85	115.08	168.19	171.75	119.05	150.22	191.73	179.55	197.07	179.23	212.43	170.85	190.61	124.89	165.56	198.05	202.37	178.61	177.05	213.45	214.91	182.86	222.05	198.18	207.35	138.58	141.37	151.68	185.69	164.94	168.66
Positive	POS_F	ERCC_00034.1	57.61	77.92	110.98	73.41	64.28	58.12	55.02	50.47	76.01	59.99	85.16	79.91	93.17	99.57	58.58	59.45	42.85	38.08	73.19	67.75	40.05	60.22	60.73	50.55	84.07	40.23	73.43	70.85	51.61	40.89	58.56	79.05	50.37	76.61	81.05	82.45	88.91	89.86	93.05	84.18	74.35	47.58	52.37	68.68	91.69	74.94	58.66
Endogenous	HKG1	Yehu_HKG1.1	3991.78	3670.96	2323.94	3388.63	3247.9	3087.64	3302.74	2818.12	2545.49	4020.46	4833.13	4949.18	4128.66	4153.92	4186.88	4375.3	3951.85	4101.67	3745.9	4122.37	3873.14	7165.57	7347.49	7021.65	5297.67	5279.75	5998.96	7409.78	8986.73	7460	8513.29	7226.62	7617.85	7703.94	8030.63	7481.83	4689.3	4783.64	4149.21	7303.32	7589.11	7795.34	8998.28	8020.78	8948.85	10564.3	9841.18
Endogenous	HKG2	Yehu_HKG2.1	2926.1	3141.51	3627.04	3287.81	3511.4	3625.18	2503.19	2801.88	3106.05	2523.47	2208.79	2124.31	2662.59	2551.7	2209.31	2087.61	2657.05	2353.38	2002.28	2032.85	2135.61	2510.02	2420.41	2174.06	2990.22	2915.15	2435.29	2760.43	2518.45	2868.16	2767.31	3070.76	2986.52	2649.75	2516.03	3170.03	2377.46	2365.75	2405.32	2683.07	2753.14	2700.4	2733.1	2720.96	2797.76	2188.79	2568.46
Endogenous	HKG3	Yehu_HKG3.1	3531.18	3412.26	4341.22	3819.41	4018.15	3387.38	5225.62	5381.69	5719.97	3829.74	3790.44	3948.16	3634.89	3742.57	3387.09	4065.77	3616.72	3509.03	4800.22	4549.5	4144.63	2669.23	2956.62	2846.1	3341.37	3073.85	3474.49	2024	2041.07	2074.01	2153.52	2417.18	2251.03	2353.65	2395.73	2329.46	4067.68	3857.59	4039.91	3209.91	3150.56	3089.66	2025.09	2165.91	2096.09	2133.7	2055.24
Endogenous	HKG4	Yehu_HKG4.1	9536.24	9260.28	10118	10451.2	10643.4	10949	10128.6	10758.1	10305	10574.3	9908.51	9571.12	10911.3	11118.5	11588.9	9067.36	10759.1	10328.1	9502.98	9837.71	10187.7	12332.2	11597.1	12502	11744.1	12491.7	11181.3	11321.4	11075.9	11648.9	10479.2	9866.97	10173.1	11707.6	11287.7	10864.7	10988.5	11189.8	11650.9	9501.94	9674.01	9631.77	11127.7	11540.9	11004.1	11715.6	11620.9
Endogenous	HKG5	Yehu_HKG5.1	2077.76	2242.66	2207.31	1837.61	1675.55	1968.58	1867.63	1787.65	1753.6	1989.08	2038.29	2057.02	1874.43	1852.86	2250.78	2426.98	2000.13	2336.09	2388.62	2178.9	2339.91	1380.36	1340.22	1504.55	1314.66	1382.83	1439.91	1743.64	1597.27	1580.93	1537.14	1544.09	1568.61	1452.85	1495.68	1361.46	1639.99	1672.95	1739.72	1367.38	1283.32	1304.57	1474.63	1498.06	1415.17	1413.86	1353.71
Messages
Endogenous	NEP14	Yehu_NEP14.1	13.1	11.97	5.73	1.44	1.85	6.23	10.22	2	6.07	32.38	42.38	100.87	22.48	21.11	71.78	41.8	42.7	90.23	39.09	51.5	52.36	2001.98	1602.76	1640.23	747.83	996.67	691.92	768.43	817.57	620.83	2375.42	2227.44	1750.59	1031.95	891.2	857.93	792.72	793.09	382.58	2901.19	2450.89	2655.03	1458.33	1200.84	1527.27	21.92	67.07
Endogenous	NEP16	Yehu_NEP16.1	1399.83	865.88	1465.77	1474.04	1304.9	963.42	96.73	101.88	109.17	2371.43	3317.71	3587.98	2123.07	2064.22	4267.46	1301.25	2185.78	3399.14	2594.29	2364.23	2778.59	410.92	411.31	492.69	148.01	234.92	98.79	1119.88	1050.12	1147.11	592.45	551.95	541.95	537.31	525.84	296.87	273.12	192.66	186.41	250.3	505.23	354.12	511.31	447.05	524.58	862.96	759.99
Endogenous	NEP3	Yehu_NEP3.1	1.23	16.36	11.49	1.02	4.75	36.2	210.86	210.69	188.88	18125.8	21366.9	22060.5	27774.6	24637.3	60056.6	35327.3	22800.7	38816.8	48068.2	40179.4	41693.4	12955.9	14894.4	13828.3	5436.71	9698.61	7564.1	4904.02	3763.27	4866.57	6717.35	7983.13	6042.23	5732.18	5793.9	5441.02	16277.9	15880	16938.6	7497.75	7975.08	7525.49	5257.28	6305.5	6507.51	10088.7	6756.13
Endogenous	NEP3_Like	Yehu_NEP3L.1	36.56	26.22	12.93	13.66	25.01	66.18	3912.46	2511.17	2932.77	28468.1	41281.6	40570.4	31107.9	26582.7	64803.3	27348.6	31495.8	49626.3	46983.3	41896.9	45642.3	12718.6	12953.2	12008.7	3903.75	6438.25	5101.96	3924.78	3290.41	3904.11	6265.77	7157.17	5735.9	3688.95	3395.28	3307.73	8580.68	8157.58	6479.52	6729.79	7592.64	6995.34	4886.07	5254.49	5602.39	11473.2	7305.29
Endogenous	NEP4	Yehu_NEP4.1	36.56	42.67	133.88	24.86	23.57	122.13	7534.17	6457.63	8303.57	48813.3	53024.6	52920.6	44011.7	40676.6	68297.5	23097.2	48326.3	55389.8	40730.6	34367	40679.4	16638.9	15821.1	15252.3	5158.64	7669.04	6223.95	4304.41	3454.49	4380.6	7307.78	8599.5	6400.12	3458.65	3102.69	3260.46	11777	11567.3	9862.89	7398.09	7954.81	7517.13	6111.95	6470.23	6638.3	10028.1	6227.1
Endogenous	NEP6	Yehu_NEP6.1	1.23	14.17	4.29	1.02	1.45	22.21	64.29	36.11	44.19	4731.17	9400.55	10049.1	5353.12	5192.53	15683.8	4091.87	7578.23	12786.3	4198.94	4853.32	5448.18	9463.44	6786.81	8990.86	1769.2	3056.22	1635.68	2080.34	2213.55	2066.9	4362.12	2961.62	3444.5	3013.92	2697.22	1704.68	295.6	272.34	166.09	1535.33	2402.43	2030.55	1974.39	1761.26	2266.31	1520.36	1907.17
Endogenous	NEP8	Yehu_NEP8.1	6.92	6.49	14.37	8.56	4.75	12.22	1.81	1	1	9.89	9.27	2.99	62.36	29.06	222.26	222.94	19.85	84.06	104.87	155.52	125.41	1219.12	1479.27	1206.57	317.35	636.95	642.25	333.81	274.94	291.32	383.53	357.24	300.83	325.16	243.65	303.03	288.69	211.14	184.3	922.08	854.18	832.93	388.18	402.29	364.73	40.29	130.32
Endogenous	NR2	Yehu_NR2.1	79.78	63.49	31.64	30.97	55.42	66.18	2521.21	1887.53	2351.41	4168.9	5207.23	5268.83	3474.2	3289.18	5307.79	2110.52	4094.66	4572.07	3180.75	2856.81	2981.33	1807.28	1766.29	1645.3	1359.23	1955.91	1692.17	1863.03	1759.42	1979.19	964.88	1769.81	1336.59	682.53	855.56	1125.11	5400.83	5178.53	4947.93	722.08	697.33	706.36	540.28	575.97	561.95	800.52	525.66
Endogenous	Ncol1	Yehu_Ncol1.1	6.92	18.55	8.61	1.02	1.45	52.19	642.78	395.02	392.48	11945.4	19776.8	23682.4	15070.2	13018.4	48240.9	14232	17408.2	33110.2	25268.7	29783.5	32439.3	11082.9	9799.35	10123.2	3617.66	6168.46	4363.71	3327.85	2468.06	3534.3	4404.94	6183.62	4454.47	3497.22	3162.1	2773.38	10305.5	9763.73	7473.72	7653.15	7947.76	7785.79	4199.8	4316.28	4823.91	7023.83	4520.69
Endogenous	Ncol3	Yehu_Ncol3.1	3.22	13.07	31.64	6.53	7.64	88.16	23008	16124.8	19719.2	69298.9	80794	82127.4	55712.1	53768.2	78550.3	34469.6	59787.1	70676.2	43422.9	42533.5	47160.3	27122.3	23339.1	23275	26693.1	37553.6	28903.3	11451.5	7766.46	15093.3	12825.4	26788	15664.3	10906.6	14691.8	17196.8	102546	103128	100201	8321.45	7138.83	7673.55	5547	6556.17	5828.67	9554.29	5133.1
Endogenous	Ncol4	Yehu_Ncol4.1	20.51	15.26	31.64	24.86	32.25	62.18	1027.83	463.23	454	14104.5	25167.8	28851.2	11202.2	9713.97	33364.7	8717.86	17050.2	29614.8	15843.7	18312.2	20283.2	5783.41	4893.41	5179.23	1760.29	2883.41	2182.06	1804	1487.46	1929.4	2907.46	3690.85	2966.81	1534.54	1529.84	1326.52	4756.73	4509.98	3086.34	3490.75	3494.22	3475.33	2191.68	2182.03	2540.34	3301.6	2315.45
Endogenous	Nematolysin_1b	Yehu_Nematsn1b.1	1.23	26.22	4.29	3.47	1	18.22	536.45	420.2	519.84	708.9	904.72	1780.19	2609.81	2284.67	4047.07	2767.95	1844.95	3433.71	7310.02	7570.45	7781.82	19216.7	16830.1	17745.2	26060.3	31955.1	30243.5	16629.3	18761.2	14944	17063.5	8229.93	9994.18	14092.3	15896.3	13816	1869.97	2211.03	1410.42	3554.86	5758	4570.26	21668.1	23295.4	20219.3	2247.55	3084.55
Endogenous	Nv1	Yehu_Nv1.1	236.6	64.59	76.28	213.26	216.13	84.16	4578.65	4504.7	3501.99	3130.72	3782.69	3246.92	464.65	908.58	693.84	905.94	8207.54	3523.84	808.99	1505.82	959.8	356858	398675	630579	137530	93840.3	72469	352268	397713	423485	169355	395243	448185	94873.2	105116	100420	7834.57	9527.02	4692.2	43329.4	89549.5	64439.1	6245.95	11727.1	77449.5	128029	601269
Endogenous	NvePTx1	Yehu_NvePTx1.1	153497	125505	84351.3	65872.5	77967.8	95260.1	53013	40722.8	55206.1	76797.4	111165	96556.1	40665.5	41547	30210.5	1519.15	66316.3	47520	6930.17	2628.77	7404.08	63.1	69.79	84.39	31.26	21.56	251.7	34.68	42.38	18.7	30913.3	21037.3	23889.7	23039	19160.8	11711.4	23.27	19.46	17.55	488.63	337.8	432.93	19430	17698.3	21848.9	25.6	72.82
[truncated: 1 more columns]

## Sheet: Entropy list
transcript (JGI)	h2	h7	h12	h24	h120	h240	temporal expression specificity (entropy)		Data source: Helm et al,BMC Genomics 2013
jgi|Nemve1|169772|estExt_gwp.C_1330015 (NG1)	88.668	80.4919	92.3331	88.3861	82.395	77.1087	0.00108697
jgi|Nemve1|188407|estExt_GenewiseH_1.C_1210120	145.83	128.843	131.381	140.614	144.491	122.711	0.00111352		Genes used for normalization (NGs) in nCOunter are highlighted in yellow.
jgi|Nemve1|224635|fgenesh1_pg.scaffold_5292000001	11.2038	12.8418	11.0073	10.5486	11.4659	10.9418	0.00112527
jgi|Nemve1|248604|estExt_fgenesh1_pg.C_7330006	4.37542	4.07016	4.78244	4.27367	3.86665	4.4263	0.00124505
jgi|Nemve1|209221|fgenesh1_pg.scaffold_102000068	38.0611	41.4656	35.7041	33.3471	41.3783	37.6246	0.00164045
jgi|Nemve1|238634|estExt_fgenesh1_pg.C_70080 (NG2)	296.283	346.391	318.892	292.354	272.625	283.974	0.00179196
jgi|Nemve1|39792|gw.37.172.1	3.71962	4.37602	4.01135	4.44896	4.88656	4.30309	0.00200381
jgi|Nemve1|244093|estExt_fgenesh1_pg.C_1080063	69.6238	58.2838	64.9991	53.4057	66.2661	60.1843	0.00214183
jgi|Nemve1|160186|estExt_gwp.C_120334	139.557	121.372	115.593	150.905	137.09	134.553	0.00216538
jgi|Nemve1|179187|estExt_GenewiseH_1.C_110129	54.8276	49.08	59.3919	46.6006	46.7133	51.503	0.00218851
jgi|Nemve1|179119|estExt_GenewiseH_1.C_100415	63.0466	57.924	55.1657	48.5327	54.903	49.3865	0.00225603
jgi|Nemve1|244885|estExt_fgenesh1_pg.C_1380016	153.708	163.008	149.633	192.579	149.947	157.157	0.00227527
jgi|Nemve1|173595|estExt_gwp.C_2590049 (NG3)	269.695	292.37	287.25	282.756	329.882	347.751	0.00231034
jgi|Nemve1|245229|estExt_fgenesh1_pg.C_1510002	75.4237	91.9227	90.2641	77.9553	97.5096	82.2328	0.00237406
jgi|Nemve1|190042|estExt_GenewiseH_1.C_1580016 (NG4)	186.202	224.7	215.534	174.854	193.71	221.819	0.00244233
jgi|Nemve1|32208|gw.55.92.1	2.63315	3.3026	2.54389	3.12408	2.94556	2.72241	0.00245914
jgi|Nemve1|174876|estExt_gwp.C_3380042 (NG5)	95.0881	99.1633	82.967	85.9972	94.1476	110.553	0.00249222
jgi|Nemve1|108065|e_gw.88.255.1	11.7017	14.6526	14.8561	15.5684	15.8736	14.1438	0.00257282
jgi|Nemve1|160874|estExt_gwp.C_160260	35.0529	43.0463	35.9702	46.3878	42.1945	41.2773	0.0026882
jgi|Nemve1|179620|estExt_GenewiseH_1.C_130251	17.361	22.9397	21.4669	18.7445	18.8784	18.2536	0.0026976
jgi|Nemve1|90881|e_gw.25.8.1	26.3321	31.4522	29.0489	32.7061	34.6915	35.2139	0.00275973
jgi|Nemve1|29999|gw.27.20.1	16.7249	19.1323	14.8243	14.9511	17.1684	14.5709	0.00276091
jgi|Nemve1|245141|estExt_fgenesh1_pg.C_1470034	94.941	96.7031	100.791	105.302	115.452	83.0998	0.00277763
jgi|Nemve1|238404|estExt_fgenesh1_pg.C_50185	30.3944	32.1555	28.5764	23.7474	27.2129	25.7358	0.00281171
jgi|Nemve1|158852|estExt_gwp.C_50377	10.9079	10.283	8.5786	10.5102	8.35135	10.2261	0.00283147
jgi|Nemve1|209130|fgenesh1_pg.scaffold_101000057	13.1211	11.0235	9.4615	10.6219	11.9161	11.693	0.00284063
jgi|Nemve1|248812|estExt_fgenesh1_pg.C_30870001	2.31131	2.43972	2.63233	1.9903	1.9903	2.31131	0.00286873
jgi|Nemve1|80560|e_gw.3.412.1	21.2884	21.2437	26.8225	26.6886	22.0917	25.305	0.00288243
jgi|Nemve1|96942|e_gw.44.112.1	7.42016	9.51526	8.11853	9.51526	8.11853	7.50746	0.00288809
jgi|Nemve1|237598|estExt_fgenesh1_kg.C_4190002	129.228	102.212	97.0225	96.4629	110.2	108.877	0.00290334
jgi|Nemve1|241819|estExt_fgenesh1_pg.C_520028	19.6462	17.3348	14.8951	17.7201	20.0314	16.1792	0.00293205
jgi|Nemve1|185991|estExt_GenewiseH_1.C_780074	73.7513	66.8556	70.9274	53.1299	68.4318	72.1095	0.00300446
jgi|Nemve1|226211|fgenesh1_kg.scaffold_5000012	24.8587	27.4473	29.1878	25.0373	33.6508	27.9828	0.0030246
jgi|Nemve1|29773|gw.69.137.1	2.16723	3.02098	2.82396	2.56127	2.69261	2.88963	0.00302839
jgi|Nemve1|101701|e_gw.61.76.1	7.94521	10.3682	8.79045	8.45235	9.86108	7.83251	0.00311155
jgi|Nemve1|122914|e_gw.194.11.1	9.30377	9.17273	9.7624	10.8762	12.3832	10.09	0.00311299
jgi|Nemve1|501|gw.378.4.1	10.8107	13.2349	11.4004	12.3177	12.1211	9.4348	0.00312435
jgi|Nemve1|195880|estExt_GenewiseH_1.C_20830004	87.7517	78.4479	77.4612	68.2278	91.6283	70.6948	0.00313914
jgi|Nemve1|177378|estExt_GenewiseH_1.C_20577	344.539	378.745	405.657	298.737	379.109	416.597	0.003249
jgi|Nemve1|60007|gw.17.266.1	74.7324	77.6216	56.6913	76.7869	79.355	68.4405	0.00338202
jgi|Nemve1|185829|estExt_GenewiseH_1.C_750179	50.0379	53.6443	55.5601	55.053	62.9419	43.5014	0.00341545
jgi|Nemve1|206682|fgenesh1_pg.scaffold_72000050	14.3488	17.2971	13.8246	15.6592	18.8041	14.6108	0.00343443
jgi|Nemve1|178696|estExt_GenewiseH_1.C_70535	152.875	144.873	144.648	140.591	145.268	106.669	0.00343928
jgi|Nemve1|190378|estExt_GenewiseH_1.C_1700036	44.3464	45.5685	42.4259	55.6075	55.7821	44.2591	0.00361363
jgi|Nemve1|210064|fgenesh1_pg.scaffold_116000020	30.0964	28.8277	34.5368	38.4839	37.2152	29.744	0.00364049
jgi|Nemve1|167347|estExt_gwp.C_860205	50.2665	60.7981	58.3051	57.5928	61.4086	43.9578	0.00370363
jgi|Nemve1|242428|estExt_fgenesh1_pg.C_630049	199.751	146.632	163.334	189.865	154.188	155.324	0.00373463
jgi|Nemve1|241237|estExt_fgenesh1_pg.C_420052	8.458	8.17606	8.73993	6.13205	8.81041	8.24655	0.00374153
jgi|Nemve1|104847|e_gw.74.81.1	32.7529	25.7209	29.4586	23.5036	28.445	24.3271	0.00377173
jgi|Nemve1|218618|fgenesh1_pg.scaffold_356000016	12.1231	11.9117	9.58573	10.361	10.1496	8.66945	0.0038004
jgi|Nemve1|231956|fgsh_est.C_scaffold_11000016	4.4521	4.53939	4.10291	5.76154	5.15046	4.3648	0.0038062
jgi|Nemve1|179528|estExt_GenewiseH_1.C_130042	17.057	18.4666	19.3829	20.0877	19.5944	14.0262	0.00381022
jgi|Nemve1|236423|estExt_fgenesh1_kg.C_90005	82.8527	78.4038	62.4313	63.2335	78.4767	64.1817	0.0038925
jgi|Nemve1|196354|fgenesh1_pg.scaffold_1000285	42.0364	44.6284	38.0919	49.8689	42.5999	34.0912	0.00391518
jgi|Nemve1|233079|fgsh_est.C_scaffold_130000003	9.48759	11.7033	7.95367	10.3966	9.5444	10.7374	0.0039251
jgi|Nemve1|216752|fgenesh1_pg.scaffold_271000007	18.123	18.123	13.9189	20.225	20.225	18.7479	0.00395085
jgi|Nemve1|99837|e_gw.54.196.1	5.25821	3.92782	4.49799	4.43463	5.63832	4.56134	0.003961
jgi|Nemve1|248636|estExt_fgenesh1_pg.C_8480002	52.5181	48.6018	50.6563	55.9209	53.738	38.0082	0.00396788
jgi|Nemve1|248557|estExt_fgenesh1_pg.C_6660002	7.45316	8.03335	9.19372	8.03335	10.4434	9.72928	0.00399238
jgi|Nemve1|13839|gw.63.8.1	3.34149	3.53805	3.07942	3.21045	4.3898	3.80013	0.00409085
jgi|Nemve1|130856|e_gw.286.21.1	2.82396	3.15233	2.75829	2.36425	3.15233	3.4807	0.00409758
jgi|Nemve1|235176|estExt_fgenesh1_pm.C_1010011	71.5877	69.497	62.9718	49.0344	61.3247	57.7136	0.00414888
jgi|Nemve1|240423|estExt_fgenesh1_pg.C_290030	43.5228	53.5324	52.0753	39.0248	49.3511	40.2285	0.00419567
jgi|Nemve1|105887|e_gw.79.61.1	23.386	23.9662	18.566	18.3428	19.771	17.4948	0.00422563
jgi|Nemve1|219445|fgenesh1_pg.scaffold_411000002	7.09998	6.53649	5.91665	6.19839	8.33965	5.973	0.00428238
jgi|Nemve1|247874|estExt_fgenesh1_pg.C_3690006	104.668	95.9983	93.7428	79.2937	98.6766	120.315	0.00432992
jgi|Nemve1|245796|estExt_fgenesh1_pg.C_1770011	51.6193	62.9833	69.853	55.7283	74.3472	60.1583	0.00433289
jgi|Nemve1|182399|estExt_GenewiseH_1.C_370173	44.0649	51.2213	50.207	38.261	38.8245	38.5427	0.00433365
jgi|Nemve1|223236|fgenesh1_pg.scaffold_2458000001	14.4302	17.3276	12.2714	13.6917	17.4413	14.6575	0.00434262
jgi|Nemve1|159283|estExt_gwp.C_70082	23.4005	21.145	18.3257	19.8058	18.6781	15.5768	0.00436297
jgi|Nemve1|206397|fgenesh1_pg.scaffold_69000038	1.7105	1.90056	1.77385	1.45709	1.96391	1.39374	0.00438626
jgi|Nemve1|175837|estExt_gwp.C_4720015	182.233	176.598	191.53	246.527	184.205	172.484	0.00443835
jgi|Nemve1|239535|estExt_fgenesh1_pg.C_160049	404.786	293.281	390.337	426.565	325.14	374.337	0.00445537
jgi|Nemve1|80159|e_gw.2.82.1	29.0785	26.9246	23.1234	31.4859	34.21	32.4995	0.00451341
jgi|Nemve1|166826|estExt_gwp.C_790037	67.0263	95.408	84.9549	87.8057	89.7063	70.0672	0.00452076
jgi|Nemve1|105193|e_gw.76.14.1	125.373	119.862	86.3487	96.2316	103.01	100.476	0.00452897
jgi|Nemve1|240864|estExt_fgenesh1_pg.C_350097	5.85163	6.47656	5.85163	7.1583	8.40816	6.59018	0.00461211
jgi|Nemve1|246109|estExt_fgenesh1_pg.C_1970018	164.426	160.369	148.367	157.777	121.094	118.953	0.00461488
jgi|Nemve1|116697|e_gw.140.24.1	60.758	55.1711	46.005	61.631	44.7828	47.5763	0.00475231
jgi|Nemve1|210849|fgenesh1_pg.scaffold_128000033	29.1432	22.3595	30.7945	32.9814	24.9926	25.9299	0.00478219
jgi|Nemve1|193483|estExt_GenewiseH_1.C_2960041	10.0157	9.95148	9.75887	12.1344	10.5293	7.70437	0.00479423
jgi|Nemve1|106638|e_gw.83.189.1	1.9842	1.62807	1.88245	2.13684	1.72982	1.42456	0.00479986
jgi|Nemve1|219848|fgenesh1_pg.scaffold_447000002	5.24156	5.11052	4.84844	4.65188	6.81403	4.97948	0.0048077
jgi|Nemve1|247227|estExt_fgenesh1_pg.C_2800020	114.066	172.015	142.557	127.193	131.517	127.803	0.00482134
jgi|Nemve1|88429|e_gw.18.24.1	24.2339	31.6425	23.6537	33.2491	31.2408	27.0456	0.00483583
jgi|Nemve1|180478|estExt_GenewiseH_1.C_190189	7.22408	6.23898	6.10764	4.92551	5.58225	5.05686	0.00489415
jgi|Nemve1|166966|estExt_gwp.C_800235	66.6768	68.2388	73.7729	95.5968	82.6989	88.0098	0.00490345
jgi|Nemve1|217527|fgenesh1_pg.scaffold_301000013	9.50032	10.221	8.84513	11.6625	8.71409	7.66578	0.00493876
jgi|Nemve1|242391|estExt_fgenesh1_pg.C_620096	10.9599	9.94625	12.7337	14.6976	11.7201	13.8741	0.00494294
jgi|Nemve1|226982|fgenesh1_kg.scaffold_100000002	9.20353	11.0783	11.8169	8.74903	11.3624	8.40816	0.00502745
jgi|Nemve1|110149|e_gw.98.120.1	31.3311	32.1016	28.2494	21.8291	24.0762	27.1579	0.00502977
jgi|Nemve1|237388|estExt_fgenesh1_kg.C_2160001	147.136	171.099	191.145	135.486	134.722	139.963	0.00503699
jgi|Nemve1|210463|fgenesh1_pg.scaffold_122000017	22.2702	28.9201	19.5032	19.9941	24.1893	22.2256	0.00505598
jgi|Nemve1|247499|estExt_fgenesh1_pg.C_3080005	36.017	33.6205	28.3343	44.4045	34.3959	33.691	0.00507698
jgi|Nemve1|136839|e_gw.384.23.1	4.1732	4.0448	5.00784	3.33856	4.43001	3.53117	0.00511174
jgi|Nemve1|143071|e_gw.737.6.1	5.67424	7.85664	8.6423	6.89638	6.80909	8.11853	0.00514333
jgi|Nemve1|247045|estExt_fgenesh1_pg.C_2650008	17.2982	13.3807	11.6508	14.9578	17.2982	14.9578	0.00517579
jgi|Nemve1|164541|estExt_gwp.C_510141	12.9603	13.1293	10.0865	14.4253	10.1428	11.1008	0.0051784
jgi|Nemve1|245654|estExt_fgenesh1_pg.C_1710020	20.485	25.8852	24.5017	18.3874	21.7347	17.8965	0.00520925
jgi|Nemve1|91512|e_gw.27.156.1	10.0313	7.52345	7.83693	8.56838	7.83693	6.37404	0.00525363
jgi|Nemve1|244969|estExt_fgenesh1_pg.C_1400042	42.958	43.3956	32.6014	52.8769	45.146	43.0309	0.00531493
jgi|Nemve1|232813|fgsh_est.C_scaffold_85000001	79.2937	76.122	58.0078	56.3162	79.5052	70.2014	0.00531605
jgi|Nemve1|247308|estExt_fgenesh1_pg.C_2890005	12.9048	14.1889	11.7492	8.86003	12.5838	12.4554	0.00533499
jgi|Nemve1|244107|estExt_fgenesh1_pg.C_1090039	186.217	204.261	156.121	205.177	146.958	152.385	0.00536219
jgi|Nemve1|234825|estExt_fgenesh1_pm.C_630022	13.3298	17.6035	18.4684	15.4666	18.3157	13.1772	0.00538009
jgi|Nemve1|131384|e_gw.294.77.1	4.87944	5.13625	6.42031	7.19075	5.26466	5.52147	0.00541322
jgi|Nemve1|81874|e_gw.5.99.1	18.7079	25.4134	19.6095	19.046	16.8484	17.4118	0.00545859
jgi|Nemve1|157973|estExt_gwp.C_20274	64.0693	58.8536	52.0167	40.8098	50.8185	49.3383	0.00546963
jgi|Nemve1|234845|estExt_fgenesh1_pm.C_660002	105.973	93.574	98.9711	111.151	90.0002	70.454	0.00550589
jgi|Nemve1|216910|fgenesh1_pg.scaffold_277000015	8.56505	9.12854	8.17061	6.64918	9.12854	10.7063	0.00550921
jgi|Nemve1|159193|estExt_gwp.C_60454	216.098	267.038	278.139	335.277	263.826	233.116	0.00551096
jgi|Nemve1|187853|estExt_GenewiseH_1.C_1090148	20.1473	19.028	13.7368	18.1122	22.1315	18.0105	0.00551372
jgi|Nemve1|208040|fgenesh1_pg.scaffold_88000005	6.792	9.50881	9.50881	9.50881	11.0762	9.92678	0.00553381
jgi|Nemve1|35024|gw.22.94.1	7.40075	8.10558	10.2906	9.02186	10.8544	7.89413	0.00556439
jgi|Nemve1|240412|estExt_fgenesh1_pg.C_280116	14.002	15.2559	12.1211	9.50881	12.7481	12.5391	0.00556875
jgi|Nemve1|202273|fgenesh1_pg.scaffold_33000117	1.7807	2.23859	2.18771	2.13684	2.69648	2.69648	0.00559625
jgi|Nemve1|238849|estExt_fgenesh1_pg.C_90037	58.5756	50.6317	36.4024	43.9972	49.6714	47.1398	0.00563629
jgi|Nemve1|104395|e_gw.72.20.1	3.83816	2.94556	3.21334	3.39186	3.92741	2.58852	0.00568194
jgi|Nemve1|228088|fgenesh1_pm.scaffold_6000019	4.19519	5.4002	5.4002	6.78372	5.62334	6.1589	0.00572865
jgi|Nemve1|104066|e_gw.71.113.1	20.6872	19.0453	18.1259	18.8483	26.9261	23.3798	0.00575539
jgi|Nemve1|181611|estExt_GenewiseH_1.C_300271	131.938	172.262	171.145	132.266	172.262	195.707	0.00575639
jgi|Nemve1|248693|estExt_fgenesh1_pg.C_13870002	4.43133	4.94264	3.69277	4.7722	5.16988	5.96525	0.00578136
jgi|Nemve1|210708|fgenesh1_pg.scaffold_126000034	9.56584	7.79682	7.60026	9.69688	11.4659	8.45201	0.00580361
jgi|Nemve1|122014|e_gw.185.18.1	3.16871	3.07945	3.25797	2.54389	4.10593	2.99019	0.00582807
jgi|Nemve1|248701|estExt_fgenesh1_pg.C_14230002	66.005	107.504	83.8738	82.4151	81.9046	79.3519	0.00586401
jgi|Nemve1|238498|estExt_fgenesh1_pg.C_60069	39.0478	41.3032	45.4617	43.4177	32.4928	30.2373	0.00589644
jgi|Nemve1|231906|fgsh_est.C_scaffold_8000012	8.67921	7.79229	6.46189	5.57497	7.28547	6.33519	0.00590406
jgi|Nemve1|170935|estExt_gwp.C_1610074	90.7832	111.585	113.254	84.1703	77.6858	84.8123	0.00591217
jgi|Nemve1|239577|estExt_fgenesh1_pg.C_160141	17.1408	14.9736	13.1347	13.4631	14.1855	10.4421	0.00598816
jgi|Nemve1|163393|estExt_gwp.C_390277	244.06	274.199	235.149	186.796	237.836	303.486	0.00601185
jgi|Nemve1|213408|fgenesh1_pg.scaffold_175000038	6.1925	4.88582	5.39713	7.32874	5.62438	7.1583	0.0060217
jgi|Nemve1|241841|estExt_fgenesh1_pg.C_520073	17.7821	16.8163	13.0099	21.2477	19.2592	19.2024	0.00605548
jgi|Nemve1|89647|e_gw.22.217.1	8.03857	7.88594	8.90348	10.1754	8.24208	6.15612	0.00606199
jgi|Nemve1|161597|estExt_gwp.C_220323	13.9182	15.665	15.496	18.4825	21.6944	16.0595	0.00607596
jgi|Nemve1|167304|estExt_gwp.C_850174	224.278	313.792	323.589	307.237	252.471	231.044	0.00613177
jgi|Nemve1|91543|e_gw.27.73.1	31.4738	32.5532	25.3381	22.2135	29.8831	34.6553	0.00613895
jgi|Nemve1|167545|estExt_gwp.C_890091	9.63047	6.99814	7.83278	5.97089	7.57597	8.53901	0.00614531
jgi|Nemve1|107023|e_gw.84.40.1	5.69823	5.5456	6.8684	7.88594	6.00349	5.0877	0.00619517
jgi|Nemve1|232621|fgsh_est.C_scaffold_64000002	25.5403	16.128	20.4017	18.214	19.2315	17.7561	0.00622209
jgi|Nemve1|212566|fgenesh1_pg.scaffold_158000017	81.6128	110.786	119.976	84.3114	99.044	117.496	0.00623406
jgi|Nemve1|106465|e_gw.82.37.1	6.42379	8.7341	8.8468	6.31109	6.70553	8.6214	0.00624265
jgi|Nemve1|122744|e_gw.192.21.1	5.30708	6.09331	7.92786	8.25545	6.48643	6.68299	0.00627565
jgi|Nemve1|111050|e_gw.103.159.1	20.1145	18.6075	17.8213	14.8074	15.004	12.9729	0.0062767
jgi|Nemve1|87917|e_gw.17.28.1	32.2356	27.5182	26.3388	24.8319	38.5254	29.1562	0.00628197
jgi|Nemve1|207834|fgenesh1_pg.scaffold_85000011	20.6734	16.115	14.1247	14.5741	20.3524	16.436	0.00629962
jgi|Nemve1|81131|e_gw.4.463.1	26.6443	44.557	40.0627	40.1269	37.6872	36.66	0.00632877
jgi|Nemve1|228390|fgenesh1_pm.scaffold_16000013	28.9634	24.2301	27.0475	37.9229	28.1182	25.5261	0.00633413
jgi|Nemve1|246608|estExt_fgenesh1_pg.C_2290024	8.61586	8.61586	7.09541	7.15877	6.08178	5.82838	0.00635035
jgi|Nemve1|236029|estExt_fgenesh1_pm.C_3530001	14.1438	14.5508	13.0245	15.2122	20.5543	15.0596	0.00635987
jgi|Nemve1|98787|e_gw.51.136.1	4.0613	4.28445	3.12408	5.04316	4.73075	3.79353	0.00637566
jgi|Nemve1|181047|estExt_GenewiseH_1.C_240291	52.5738	49.6282	43.3801	34.9897	44.1834	35.5253	0.00638341
jgi|Nemve1|185329|estExt_GenewiseH_1.C_690140	12.9426	14.46	14.8171	17.2717	10.5326	12.7195	0.00639706
jgi|Nemve1|181539|estExt_GenewiseH_1.C_290173	142.44	137.845	137.918	176.645	132.885	104.587	0.00639711
jgi|Nemve1|166934|estExt_gwp.C_800083	29.3315	29.5933	29.5933	24.0064	39.3705	33.8708	0.0064161
jgi|Nemve1|243523|estExt_fgenesh1_pg.C_910028	7.67631	9.55076	9.50613	10.2202	6.42668	9.23835	0.00643337
jgi|Nemve1|247627|estExt_fgenesh1_pg.C_3250021	7.6122	8.24655	7.54171	11.4888	9.16283	8.10558	0.00644545
jgi|Nemve1|238560|estExt_fgenesh1_pg.C_60167	4.73075	4.28445	4.15056	3.52575	5.53408	5.35557	0.00647653
jgi|Nemve1|114921|e_gw.128.6.1	7.47553	11.5934	10.8965	10.7698	11.9735	12.2269	0.00648786
jgi|Nemve1|201288|fgenesh1_pg.scaffold_27000051	1.9316	1.64755	1.76117	1.59073	1.30667	1.24986	0.00648789
jgi|Nemve1|124761|e_gw.213.67.1	14.0033	10.5025	14.7326	13.8574	15.8996	10.7213	0.00650054
jgi|Nemve1|244464|estExt_fgenesh1_pg.C_1220038	79.8045	76.1449	106.834	101.12	70.9444	79.9971	0.00653746
jgi|Nemve1|247826|estExt_fgenesh1_pg.C_3560010	28.4738	23.5199	25.9745	22.8504	17.1824	21.6008	0.00654523
jgi|Nemve1|160479|estExt_gwp.C_130460	39.4707	56.7391	46.0961	55.5408	40.5279	40.246	0.00657663
jgi|Nemve1|246296|estExt_fgenesh1_pg.C_2100010	56.7	65.8226	54.6727	42.8259	52.202	42.6358	0.00658453
jgi|Nemve1|245470|estExt_fgenesh1_pg.C_1610032	21.0812	23.3798	16.1557	17.3378	18.9796	14.9736	0.00658534
jgi|Nemve1|50259|gw.73.168.1	28.5171	37.1233	25.3809	36.7586	39.2383	31.1427	0.00658583
jgi|Nemve1|122926|e_gw.194.27.1	5.14528	5.4977	5.35673	6.20253	6.55495	7.96461	0.00659416
jgi|Nemve1|190285|estExt_GenewiseH_1.C_1670082	57.1943	60.2935	44.1213	42.8816	65.0268	50.3197	0.00663166
jgi|Nemve1|50047|gw.357.74.1	16.9868	13.294	13.0099	10.3966	15.9641	14.4302	0.0066372
jgi|Nemve1|154782|e_gw.7736.12.1	21.4669	17.361	14.3261	18.8784	13.8798	15.8435	0.00665388
jgi|Nemve1|135342|e_gw.355.7.1	11.34	15.5846	12.8604	11.0866	16.7883	12.9871	0.00665643
jgi|Nemve1|238864|estExt_fgenesh1_pg.C_90066	11.8468	10.9599	11.0232	9.43943	15.5212	11.9735	0.00666502
jgi|Nemve1|202288|fgenesh1_pg.scaffold_33000132	33.1332	34.0912	40.3459	49.5871	48.1784	38.6554	0.00669854
jgi|Nemve1|159004|estExt_gwp.C_60036	30.6784	21.2477	30.9057	36.246	31.2465	33.1782	0.00671472
jgi|Nemve1|236559|estExt_fgenesh1_kg.C_250007	62.1692	73.639	79.3963	86.1353	58.8666	57.3045	0.00673823
jgi|Nemve1|194069|estExt_GenewiseH_1.C_3380029	7.88082	6.6987	7.61813	7.81515	10.3107	6.50168	0.00673967
jgi|Nemve1|206717|fgenesh1_pg.scaffold_73000012	122.152	113.165	115.882	74.1896	121.002	108.463	0.00678504
jgi|Nemve1|99062|e_gw.52.215.1	78.9962	95.715	80.4591	120.375	96.4465	79.9367	0.00678941
jgi|Nemve1|119279|e_gw.160.71.1	65.1258	60.7545	40.9887	46.9438	52.8988	48.7176	0.00679156
jgi|Nemve1|178205|estExt_GenewiseH_1.C_50588	34.5984	47.2107	36.3028	30.9625	47.3243	40.2228	0.00681759
jgi|Nemve1|238274|estExt_fgenesh1_pg.C_40232	13.2997	15.308	17.4502	11.0682	14.3708	17.6734	0.00685692
jgi|Nemve1|244471|estExt_fgenesh1_pg.C_1230007	104.057	116.889	95.2399	152.506	118.548	103.97	0.00686303
jgi|Nemve1|232984|fgsh_est.C_scaffold_111000005	17.0947	17.3999	17.7561	15.5175	16.7894	10.7859	0.00687293
jgi|Nemve1|35830|gw.5.212.1	3.57375	3.79255	4.44896	3.20908	5.17829	3.86549	0.00691264
jgi|Nemve1|113330|e_gw.117.8.1	0.86491	1.06842	1.06842	1.01754	1.17017	0.712278	0.00692837
jgi|Nemve1|245571|estExt_fgenesh1_pg.C_1670033	6.06964	9.50613	7.76557	7.31927	7.49779	9.64002	0.0069421
jgi|Nemve1|243140|estExt_fgenesh1_pg.C_800025	8.81041	9.44476	12.9689	12.687	12.4051	9.58573	0.00694833
jgi|Nemve1|80692|e_gw.3.325.1	11.0866	12.9198	10.2136	8.99149	9.07878	8.03123	0.00696466
jgi|Nemve1|238163|estExt_fgenesh1_pg.C_40048	12.4487	16.1833	14.3488	14.5453	20.311	17.5592	0.00696782
jgi|Nemve1|248568|estExt_fgenesh1_pg.C_6830008	13.3673	13.1772	11.7201	13.6207	17.0417	18.3087	0.0069872
jgi|Nemve1|243597|estExt_fgenesh1_pg.C_920093	20.7861	24.3599	20.7132	22.6095	24.5787	32.3826	0.00699752
jgi|Nemve1|243885|estExt_fgenesh1_pg.C_1010025	44.283	52.0753	54.0392	46.7537	46.627	69.7505	0.00700399
jgi|Nemve1|5623|gw.2145.1.1	0.786234	0.982792	0.720714	0.720714	0.982792	0.655195	0.00700894
jgi|Nemve1|238226|estExt_fgenesh1_pg.C_40144	30.5382	25.2186	25.8097	26.4664	38.9444	32.6397	0.00702878
jgi|Nemve1|174147|estExt_gwp.C_2890028	2.18771	2.49297	2.69648	1.72982	2.39122	2.89999	0.00704017
jgi|Nemve1|246748|estExt_fgenesh1_pg.C_2390006	361.099	287.058	290.941	360.385	222.658	325.083	0.00704862
jgi|Nemve1|238321|estExt_fgenesh1_pg.C_50049	37.8211	32.7529	24.7072	24.3905	33.7032	29.7754	0.00705229
jgi|Nemve1|211075|fgenesh1_pg.scaffold_132000011	10.5935	9.56626	7.70437	11.2355	9.63047	7.12655	0.00705679
jgi|Nemve1|226738|fgenesh1_kg.scaffold_58000007	4.62062	3.32459	3.21189	3.49364	4.33887	3.04285	0.00707044
jgi|Nemve1|89613|e_gw.22.45.1	17.0751	24.0365	22.329	19.0453	17.8632	15.0392	0.00707881
jgi|Nemve1|110116|e_gw.98.208.1	2.72697	3.46553	3.40871	2.3861	3.92002	3.23828	0.00709813
jgi|Nemve1|217391|fgenesh1_pg.scaffold_295000012	12.478	11.9526	9.12862	10.7705	9.25996	14.2511	0.00712326
jgi|Nemve1|191273|estExt_GenewiseH_1.C_1990124	60.2883	73.0946	54.5747	44.5266	69.2199	66.7243	0.00715296
jgi|Nemve1|199190|fgenesh1_pg.scaffold_13000197	4.79417	3.94041	2.95531	3.218	3.41502	3.54637	0.0071691
jgi|Nemve1|174250|estExt_gwp.C_2950003	18.5547	31.3311	27.0295	28.121	29.7902	24.7824	0.00718126
jgi|Nemve1|245366|estExt_fgenesh1_pg.C_1570024	49.1819	39.4527	44.8529	65.1147	52.0829	56.8136	0.00718673
jgi|Nemve1|243473|estExt_fgenesh1_pg.C_890053	19.1298	22.6912	17.2473	24.2683	28.3385	21.4192	0.00718809
jgi|Nemve1|130809|e_gw.286.1.1	232.351	209.366	178.741	299.829	211.1	224.647	0.00719229
jgi|Nemve1|98373|e_gw.49.162.1	41.3086	33.4278	26.7291	27.0575	33.8219	38.419	0.00720542
jgi|Nemve1|166761|estExt_gwp.C_780064	30.0128	40.7832	32.9681	36.9742	48.4014	43.6072	0.00724736
jgi|Nemve1|237706|estExt_fgenesh1_pg.C_10034	10.263	8.55251	9.50279	10.5798	10.263	6.39854	0.007253
jgi|Nemve1|239186|estExt_fgenesh1_pg.C_120182	12.9238	14.0008	12.607	16.5982	18.9422	12.4803	0.00725345
jgi|Nemve1|228721|fgenesh1_pm.scaffold_32000010	19.7705	19.316	16.7027	24.6564	19.4297	14.6007	0.00726246
jgi|Nemve1|173973|estExt_gwp.C_2780051	8.73162	10.0157	7.76858	11.7492	7.51176	8.1538	0.00726321
jgi|Nemve1|228853|fgenesh1_pm.scaffold_38000019	2.49972	2.72697	2.72697	2.04523	3.52234	2.89741	0.00728621
jgi|Nemve1|106806|e_gw.83.109.1	13.9757	14.6575	9.43078	14.6007	15.1688	16.305	0.00728822
jgi|Nemve1|178888|estExt_GenewiseH_1.C_90067	51.503	54.6022	43.8959	34.88	39.2753	38.4864	0.00729018
jgi|Nemve1|212544|fgenesh1_pg.scaffold_157000063	3.71904	4.28253	4.39522	5.8603	5.6349	5.35316	0.00732669
jgi|Nemve1|238950|estExt_fgenesh1_pg.C_100060	60.4196	66.5929	43.6072	56.7419	74.2767	67.775	0.00733819
jgi|Nemve1|41453|gw.1924.2.1	2.09061	2.59743	2.78748	1.90056	2.40737	1.77385	0.00737835
jgi|Nemve1|20143|gw.141.6.1	155.242	168.596	100.639	128.419	156.087	134.731	0.00737981
jgi|Nemve1|243875|estExt_fgenesh1_pg.C_1010003	3.61204	3.61204	2.62694	2.69261	4.13743	3.15233	0.00742143
jgi|Nemve1|95089|e_gw.38.85.1	57.6553	51.5938	34.8892	43.9111	40.8098	42.431	0.00743145
jgi|Nemve1|235323|estExt_fgenesh1_pm.C_1270008	55.7943	57.4718	43.7602	38.0714	52.3664	39.2383	0.00743981
jgi|Nemve1|205359|fgenesh1_pg.scaffold_58000097	28.3699	26.4699	20.5076	21.4904	28.3699	33.0218	0.00745195
jgi|Nemve1|99150|e_gw.52.181.1	3.13615	4.15722	2.84442	3.86549	2.84442	2.77148	0.0074754
jgi|Nemve1|222583|fgenesh1_pg.scaffold_1743000002	4.58636	6.42091	5.83123	7.4037	7.33818	7.4037	0.00748008
jgi|Nemve1|237756|estExt_fgenesh1_pg.C_10125	42.8235	45.3274	26.9011	44.1717	37.5588	42.1172	0.00748328
jgi|Nemve1|101727|e_gw.61.42.1	61.4831	58.9304	46.7505	36.3939	50.3243	52.2935	0.00752113
jgi|Nemve1|239069|estExt_fgenesh1_pg.C_110134	19.2423	23.9052	23.2484	15.4333	26.2037	21.6723	0.00753666
jgi|Nemve1|238943|estExt_fgenesh1_pg.C_100045	45.132	42.2513	37.6246	36.577	54.9092	55.2584	0.00754017
jgi|Nemve1|83542|e_gw.7.438.1	3.57915	3.40871	3.29509	3.74959	2.21566	2.89741	0.00754869
jgi|Nemve1|191988|estExt_GenewiseH_1.C_2230082	0.112698	0.112698	0.112698	0.112698	0.169047	0.112698	0.0075491
jgi|Nemve1|166681|estExt_gwp.C_770030	177.099	218.77	232.791	145.65	184.896	159.147	0.00756841
jgi|Nemve1|182641|estExt_GenewiseH_1.C_390296	73.0588	63.5973	93.9455	99.1226	73.639	68.819	0.0075758
jgi|Nemve1|224096|fgenesh1_pg.scaffold_3889000001	4.58636	5.63467	6.22435	7.66578	7.27266	6.02779	0.00758386
jgi|Nemve1|138209|e_gw.425.2.1	15.1049	15.3676	12.2809	18.1259	13.069	10.9675	0.00759061
jgi|Nemve1|138459|e_gw.432.23.1	22.9071	29.2506	26.7132	18.3961	20.7221	20.0173	0.00760486
jgi|Nemve1|165271|estExt_gwp.C_580171	74.7828	84.439	75.9105	91.4169	113.196	110.236	0.00761955
jgi|Nemve1|207820|fgenesh1_pg.scaffold_84000076	80.3269	54.8398	75.1508	59.033	88.5168	77.313	0.00763173
jgi|Nemve1|194815|estExt_GenewiseH_1.C_4220017	52.0665	51.6721	51.7847	37.9792	65.3649	61.4768	0.00763204
jgi|Nemve1|125584|e_gw.221.60.1	6.02935	4.39522	4.50792	5.80395	6.87458	6.48014	0.00771596
jgi|Nemve1|169407|estExt_gwp.C_1260137	8.10558	13.7442	10.502	10.361	11.4888	9.23331	0.00771685
jgi|Nemve1|141896|e_gw.616.1.1	47.1152	36.321	30.851	30.0487	34.7894	30.1216	0.00772119
jgi|Nemve1|88457|e_gw.18.96.1	4.16983	4.39522	3.54999	5.12776	5.91665	5.29681	0.00773826
jgi|Nemve1|124153|e_gw.207.11.1	9.92102	10.7859	7.78419	6.51226	9.66664	8.14033	0.00773924
jgi|Nemve1|247251|estExt_fgenesh1_pg.C_2840003	28.6346	34.4771	39.5491	29.8544	22.7921	32.23	0.00774021
jgi|Nemve1|190669|estExt_GenewiseH_1.C_1770023	37.5981	46.2981	37.5981	41.2104	33.1718	26.7613	0.00775889
jgi|Nemve1|80454|e_gw.3.195.1	18.7642	18.5952	16.9047	15.2706	22.6523	24.8499	0.00776838
jgi|Nemve1|181204|estExt_GenewiseH_1.C_260104	45.5836	54.0439	43.1768	53.0228	69.0682	63.5982	0.00776942
jgi|Nemve1|231884|fgsh_est.C_scaffold_7000015	16.5859	18.3157	14.7035	12.1596	12.9736	11.5491	0.00783357
jgi|Nemve1|237062|estExt_fgenesh1_kg.C_1010004	17.7618	25.374	25.4445	31.1536	21.9908	23.33	0.00784458
jgi|Nemve1|124563|e_gw.212.22.1	4.7722	5.51075	5.05626	5.79481	3.8064	3.69277	0.00785048
jgi|Nemve1|205753|fgenesh1_pg.scaffold_62000072	152.872	160.187	124.032	150.051	196.341	204.283	0.00787664
jgi|Nemve1|234402|estExt_fgenesh1_pm.C_270004	23.8836	32.1658	33.6424	34.5413	27.7999	21.9575	0.00788624
jgi|Nemve1|208916|fgenesh1_pg.scaffold_98000080	20.311	27.1251	16.9695	23.587	17.2316	22.7353	0.00789904
jgi|Nemve1|212662|fgenesh1_pg.scaffold_160000027	47.0397	36.3732	34.1417	53.3771	45.3884	35.436	0.00790269
jgi|Nemve1|84068|e_gw.9.57.1	6.28531	6.5472	5.32506	5.15046	4.53939	4.01562	0.00792278
jgi|Nemve1|124231|e_gw.208.47.1	35.227	30.9239	27.0584	24.3599	40.4782	35.0082	0.00792988
jgi|Nemve1|90986|e_gw.26.202.1	34.21	49.5412	31.8027	30.2822	34.5901	36.8708	0.00794004
jgi|Nemve1|241495|estExt_fgenesh1_pg.C_460079	50.1841	37.1447	51.1709	66.3248	56.6686	56.1047	0.00794755
jgi|Nemve1|199932|fgenesh1_pg.scaffold_18000056	4.05713	4.73332	4.62062	3.66269	4.11348	2.7611	0.0079545
jgi|Nemve1|12640|gw.169.10.1	21.3564	17.8323	12.0526	16.775	16.8455	19.5239	0.00797282
jgi|Nemve1|234167|estExt_fgenesh1_pm.C_120023	59.8942	62.7839	50.1089	63.3093	79.9903	48.3357	0.00799075
jgi|Nemve1|246362|estExt_fgenesh1_pg.C_2130031	4.0613	3.52575	2.99019	4.77538	3.12408	4.32908	0.00800309
jgi|Nemve1|109727|e_gw.96.22.1	26.5801	21.5722	18.4263	25.0392	22.0217	15.9224	0.00803896
jgi|Nemve1|173802|estExt_gwp.C_2700032	56.1313	63.3769	40.5926	47.4017	43.9972	40.7672	0.00804001
jgi|Nemve1|114254|e_gw.124.47.1	17.9411	25.1712	15.4419	17.0039	22.6719	19.0569	0.00804435
jgi|Nemve1|238183|estExt_fgenesh1_pg.C_40083	130.72	126.958	91.8488	94.8791	99.1633	83.1759	0.00804699
jgi|Nemve1|86795|e_gw.14.196.1	15.7783	13.0615	12.1211	18.8086	15.7783	11.7031	0.00808222
jgi|Nemve1|164749|estExt_gwp.C_530090	138.452	152.141	127.69	118.599	198.327	156.321	0.00808606
jgi|Nemve1|244771|estExt_fgenesh1_pg.C_1330028	17.6592	17.1368	24.4512	27.377	21.212	19.6446	0.00809779
jgi|Nemve1|226179|fgenesh1_kg.scaffold_4000005	9.654	8.86592	7.74947	11.0331	12.0182	12.7407	0.00810047
jgi|Nemve1|227384|fgenesh1_kg.scaffold_230000006	138.064	137.48	133.542	177.812	148.493	98.1688	0.00810247
jgi|Nemve1|185504|estExt_GenewiseH_1.C_710167	7.14162	11.4659	8.38649	7.99338	8.51753	7.01058	0.00810446
jgi|Nemve1|182709|estExt_GenewiseH_1.C_400169	37.6338	45.8753	46.6776	41.2805	60.0974	58.347	0.00811791
jgi|Nemve1|20238|gw.88.39.1	22.1456	21.2283	17.6247	13.6936	23.456	18.673	0.00812005
jgi|Nemve1|163339|estExt_gwp.C_390058	47.6209	48.9946	28.5929	41.9227	48.7402	42.635	0.00812068
jgi|Nemve1|91476|e_gw.27.215.1	4.87944	6.29191	7.89698	6.54872	8.218	7.76858	0.00812873
jgi|Nemve1|227549|fgenesh1_kg.scaffold_351000002	47.6485	44.4093	52.9776	62.4864	73.4581	54.0226	0.00816822
jgi|Nemve1|93818|e_gw.34.169.1	8.86003	9.37365	11.7492	11.1713	8.73162	13.8679	0.00817886
jgi|Nemve1|14714|gw.191.26.1	4.20408	4.54495	5.45394	3.29509	3.8064	3.52234	0.00818761
jgi|Nemve1|20815|gw.50.10.1	38.3816	43.1569	46.281	49.7621	62.6601	59.3575	0.00821522
jgi|Nemve1|184920|estExt_GenewiseH_1.C_630098	84.0119	115.882	116.091	136.572	99.3723	87.0422	0.00822608
jgi|Nemve1|181063|estExt_GenewiseH_1.C_250015	42.5521	46.5289	47.7788	39.0866	61.7545	60.7319	0.00823651
jgi|Nemve1|208460|fgenesh1_pg.scaffold_92000076	27.9112	29.8158	31.1292	21.8693	22.2633	35.398	0.00823964
jgi|Nemve1|58243|gw.97.138.1	9.48759	16.021	12.8395	11.9873	11.5896	10.2261	0.00824787
jgi|Nemve1|122262|e_gw.188.10.1	16.4454	22.0145	17.2971	22.7353	17.8868	13.6281	0.0083055
jgi|Nemve1|239551|estExt_fgenesh1_pg.C_160095	9.94208	9.60121	8.1241	6.41975	6.47656	9.14672	0.0083228
jgi|Nemve1|168575|estExt_gwp.C_1090021	77.4291	81.5665	73.3573	114.338	104.684	77.7574	0.00833558
jgi|Nemve1|241933|estExt_fgenesh1_pg.C_530123	14.5047	14.7278	13.8798	9.05983	16.4237	14.8617	0.00834752
jgi|Nemve1|205028|fgenesh1_pg.scaffold_55000135	2.46692	2.74885	3.24223	4.08803	2.81933	3.59465	0.00834781
jgi|Nemve1|170199|estExt_gwp.C_1420062	151.348	164.018	176.625	148.053	235.226	148.687	0.00835555
jgi|Nemve1|167432|estExt_gwp.C_880058	10.1125	12.3282	14.3166	11.1919	15.9641	10.1693	0.00836075
jgi|Nemve1|90306|e_gw.23.280.1	25.2141	21.9198	16.7249	15.9013	20.1459	24.6439	0.00837844
jgi|Nemve1|90754|e_gw.25.171.1	14.4199	19.0176	15.9873	19.5401	24.1377	22.0479	0.00837879
jgi|Nemve1|110646|e_gw.101.122.1	2.36425	1.9702	1.83886	3.08665	2.62694	2.56127	0.00843349
jgi|Nemve1|124776|e_gw.213.5.1	22.2785	35.2475	26.1307	26.5159	28.442	20.7376	0.00844711
jgi|Nemve1|248424|estExt_fgenesh1_pg.C_5580001	25.6222	34.5416	36.3596	36.0756	24.6564	25.2245	0.0084543
jgi|Nemve1|243947|estExt_fgenesh1_pg.C_1020070	3.86549	3.71962	5.03243	5.03243	3.13615	3.64669	0.00848616
jgi|Nemve1|223619|fgenesh1_pg.scaffold_3071000001	1.38574	1.31281	1.38574	2.11508	1.45867	1.38574	0.00850308
jgi|Nemve1|198929|fgenesh1_pg.scaffold_12000152	0.63435	0.63435	0.4229	0.63435	0.563866	0.4229	0.00851971
jgi|Nemve1|236978|estExt_fgenesh1_kg.C_830005	90.6134	73.2508	79.8027	58.3778	103.324	88.7789	0.0085445
jgi|Nemve1|223042|fgenesh1_pg.scaffold_2198000003	23.8938	21.9203	16.2112	21.7793	28.8277	26.5722	0.00856296
jgi|Nemve1|242549|estExt_fgenesh1_pg.C_660062	1476.58	2012.52	1865.5	1613.47	1496.02	2380.86	0.00856383
jgi|Nemve1|178940|estExt_GenewiseH_1.C_90405	263.519	277.737	223.028	158.688	236.198	204.683	0.00856632
jgi|Nemve1|87356|e_gw.15.257.1	7.33026	7.75316	5.28625	9.3038	8.8809	8.66945	0.00856652
jgi|Nemve1|194411|estExt_GenewiseH_1.C_3730015	29.0152	43.5228	37.1242	49.858	36.7441	33.4498	0.00858242
jgi|Nemve1|218131|fgenesh1_pg.scaffold_332000007	5.64987	5.26466	4.75103	3.27436	3.98059	4.36581	0.00860052
jgi|Nemve1|244691|estExt_fgenesh1_pg.C_1310024	51.6194	64.163	39.5354	43.2788	42.2281	41.7683	0.00861215
jgi|Nemve1|122785|e_gw.193.27.1	78.5889	83.5932	59.7698	107.417	91.9807	95.1525	0.00863265
jgi|Nemve1|215604|fgenesh1_pg.scaffold_232000018	12.607	13.9374	9.75619	15.1411	16.5982	11.2133	0.00863364
jgi|Nemve1|181605|estExt_GenewiseH_1.C_300265	131.974	134.064	122.152	75.13	119.957	117.867	0.00863662
jgi|Nemve1|231988|fgsh_est.C_scaffold_13000013	176.543	225.538	168.403	269.394	241.971	260.389	0.00865299
jgi|Nemve1|248445|estExt_fgenesh1_pg.C_5670009	5.32886	6.86973	7.76858	4.87944	6.80553	5.07205	0.00865724
jgi|Nemve1|129977|e_gw.271.1.1	48.6543	47.6406	53.7224	33.8299	36.9975	55.1162	0.00866965
jgi|Nemve1|166745|estExt_gwp.C_780004	21.7344	24.5557	28.4219	27.795	35.7364	21.9434	0.00867805
jgi|Nemve1|155018|e_gw.8019.1.1	2.16214	1.63799	1.37591	1.76903	2.3587	1.76903	0.00867864
jgi|Nemve1|190712|estExt_GenewiseH_1.C_1770142	5.70019	6.87954	3.73461	5.83123	6.28987	5.70019	0.00869276
jgi|Nemve1|137230|e_gw.393.29.1	12.9426	13.7013	15.4865	9.10446	12.4963	16.2006	0.00870424
jgi|Nemve1|167835|estExt_gwp.C_930138	12.3258	18.5981	14.3679	15.6078	21.3696	17.5041	0.00872423
jgi|Nemve1|93121|e_gw.32.58.1	17.2124	9.62725	13.0551	12.7634	15.4619	12.8363	0.00873884
jgi|Nemve1|167541|estExt_gwp.C_890087	11.7935	16.9695	12.1211	10.4176	14.3488	10.6142	0.00876613
jgi|Nemve1|168454|estExt_gwp.C_1050022	45.9947	34.7253	37.5427	44.6843	55.9536	55.6916	0.0087783
jgi|Nemve1|119994|e_gw.166.31.1	16.6368	17.7561	15.314	13.5333	14.4491	9.87014	0.00878555
jgi|Nemve1|118094|e_gw.151.51.1	15.0235	11.6208	12.2628	16.6928	15.0877	9.82308	0.00881539
jgi|Nemve1|170340|estExt_gwp.C_1450053	43.9356	50.6999	55.9538	52.6045	39.5354	32.7054	0.00882312
jgi|Nemve1|178259|estExt_GenewiseH_1.C_60065	86.931	107.861	89.3065	57.3976	82.3084	85.9038	0.00883945
jgi|Nemve1|237381|estExt_fgenesh1_kg.C_2110002	18.6343	28.8036	24.77	32.1555	29.0309	22.2135	0.00886373
jgi|Nemve1|159188|estExt_gwp.C_60449	15.6701	19.842	15.1614	23.4543	24.1157	18.2649	0.00887353
jgi|Nemve1|224032|fgenesh1_pg.scaffold_3759000001	18.96	19.6648	18.5371	18.5371	14.6605	11.4888	0.00888178
jgi|Nemve1|232793|fgsh_est.C_scaffold_82000012	5.77828	9.63047	6.93394	6.1635	8.53901	7.31915	0.00890069
jgi|Nemve1|174878|estExt_gwp.C_3390001	9.52266	13.5944	11.2958	10.4421	9.32564	7.61813	0.00892032
jgi|Nemve1|110998|e_gw.103.56.1	6.83004	5.64792	3.94041	5.25388	6.56735	4.92551	0.00892809
jgi|Nemve1|206870|fgenesh1_pg.scaffold_74000066	19.6446	16.1963	15.4649	12.4346	18.5996	21.9434	0.00893051
jgi|Nemve1|85975|e_gw.12.352.1	21.8071	17.9753	16.0031	14.9888	16.6793	12.0023	0.0089513
jgi|Nemve1|188563|estExt_GenewiseH_1.C_1240166	18.4684	27.5754	27.3718	17.1456	21.1648	21.7754	0.00898902
jgi|Nemve1|159600|estExt_gwp.C_80425	146.533	212.862	138.107	159.203	222.302	179.033	0.00902592
jgi|Nemve1|93714|e_gw.33.317.1	13.1658	11.7376	12.6302	13.6567	9.68465	7.98872	0.00903098
jgi|Nemve1|178208|estExt_GenewiseH_1.C_50593	15.8736	22.9455	21.0631	19.5368	28.2368	25.1333	0.00903898
jgi|Nemve1|31227|gw.8.46.1	13.9757	12.6691	14.203	10.1693	15.2824	18.5775	0.00905449
jgi|Nemve1|239013|estExt_fgenesh1_pg.C_110025	26.4043	36.5599	37.4771	34.1356	48.6154	40.6876	0.00906011
jgi|Nemve1|215897|fgenesh1_pg.scaffold_242000019	22.6042	19.1317	13.1694	15.5281	19.5248	15.3316	0.00906177
jgi|Nemve1|201177|fgenesh1_pg.scaffold_26000106	4.64149	6.33742	5.26631	3.61501	4.10593	4.59686	0.0090722
jgi|Nemve1|120559|e_gw.171.10.1	28.4628	21.4749	20.3955	26.1335	28.2923	34.8257	0.00907511
jgi|Nemve1|242737|estExt_fgenesh1_pg.C_710009	288.563	318.428	336.066	218.352	211.703	238.469	0.00907665
jgi|Nemve1|172382|estExt_gwp.C_2110043	6.98786	9.9989	7.44236	6.76062	7.1583	5.51075	0.0091171
jgi|Nemve1|223246|fgenesh1_pg.scaffold_2476000001	0.126704	0.190056	0.126704	0.190056	0.190056	0.190056	0.00916237
jgi|Nemve1|237913|estExt_fgenesh1_pg.C_20149	16.9421	20.1473	15.8228	14.3473	12.2105	12.1087	0.00923678
jgi|Nemve1|186249|estExt_GenewiseH_1.C_810044	31.6011	29.4187	30.9901	42.8623	35.0057	23.3953	0.00924092
jgi|Nemve1|243609|estExt_fgenesh1_pg.C_930011	74.1546	71.0086	60.2225	90.719	101.441	96.7541	0.00924322
jgi|Nemve1|232373|fgsh_est.C_scaffold_42000008	87.1089	67.0897	83.1177	86.1586	53.3423	61.1346	0.00925751
jgi|Nemve1|230851|fgenesh1_pm.scaffold_274000003	12.5391	14.211	15.0469	11.3897	9.71779	9.09084	0.00926424
jgi|Nemve1|220648|fgenesh1_pg.scaffold_552000001	8.4258	9.50279	7.28547	6.01843	6.20849	5.95508	0.00928589
jgi|Nemve1|213814|fgenesh1_pg.scaffold_185000010	4.91114	5.22462	6.68751	3.65723	6.16505	5.4336	0.00932802
jgi|Nemve1|33659|gw.32.106.1	34.5943	25.4216	23.3905	25.8802	27.0595	18.673	0.00933187
jgi|Nemve1|196427|fgenesh1_pg.scaffold_2000049	5.35673	6.3435	6.20253	8.31703	7.47123	9.16283	0.00933778
jgi|Nemve1|237807|estExt_fgenesh1_pg.C_10267	12.3466	15.696	8.47188	12.872	14.6452	12.3466	0.00934971
jgi|Nemve1|132347|e_gw.308.19.1	15.7537	12.0341	11.9611	8.67911	14.8055	13.4927	0.00935038
jgi|Nemve1|173335|estExt_gwp.C_2450090	11.34	14.6976	12.1002	7.72893	10.7698	11.4033	0.00936708
jgi|Nemve1|222195|fgenesh1_pg.scaffold_1451000002	0.802271	0.58347	0.875205	0.58347	0.729337	0.948138	0.00939552
jgi|Nemve1|228848|fgenesh1_pm.scaffold_38000014	99.1672	100.506	87.2065	100.551	70.6042	61.0981	0.00942735
jgi|Nemve1|238581|estExt_fgenesh1_pg.C_60206	195.9	175.479	146.378	231.565	254.976	233.534	0.00943938
jgi|Nemve1|202773|fgenesh1_pg.scaffold_38000003	203.447	248.274	188.609	135.631	220.897	233.749	0.00944593
jgi|Nemve1|176370|estExt_gwp.C_7280005	24.1174	26.315	20.7928	16.4539	23.2158	15.9468	0.00945861
jgi|Nemve1|242429|estExt_fgenesh1_pg.C_630051	2.08596	2.28947	1.27193	1.57719	1.93333	1.83157	0.00949985
jgi|Nemve1|100096|e_gw.55.222.1	10.221	13.7591	9.23825	14.5453	12.0556	9.10721	0.00950854
jgi|Nemve1|126362|e_gw.231.17.1	18.0304	14.0137	20.485	22.7612	24.1447	24.591	0.00952475
jgi|Nemve1|200569|fgenesh1_pg.scaffold_22000091	14.3488	13.3005	8.51753	10.5486	13.5625	9.95896	0.00952551
jgi|Nemve1|180983|estExt_GenewiseH_1.C_240117	18.4952	19.1221	21.7344	15.6739	13.375	13.166	0.00953464
jgi|Nemve1|196291|fgenesh1_pg.scaffold_1000222	10.1263	13.0944	9.16608	7.42016	8.20582	9.16608	0.00954741
jgi|Nemve1|204900|fgenesh1_pg.scaffold_55000007	132.015	78.025	83.2408	110.447	104.668	121.161	0.00954773
jgi|Nemve1|181446|estExt_GenewiseH_1.C_280093	21.1908	31.9851	32.5532	32.326	36.9845	24.1451	0.00955507
jgi|Nemve1|212816|fgenesh1_pg.scaffold_163000033	5.97629	7.22408	4.85984	4.2031	4.85984	4.72849	0.00957683
jgi|Nemve1|239938|estExt_fgenesh1_pg.C_220045	424.521	416.909	372.363	395.834	307.237	243.097	0.00961282
jgi|Nemve1|119101|e_gw.158.75.1	6.06156	5.63866	5.28625	6.62543	8.458	4.86335	0.00961782
jgi|Nemve1|245329|estExt_fgenesh1_pg.C_1550041	8.99597	9.05932	5.32156	7.60223	6.7153	9.05932	0.00962031
jgi|Nemve1|196477|fgenesh1_pg.scaffold_2000099	13.2104	11.9608	12.4071	7.63168	12.4963	9.23835	0.00962054
jgi|Nemve1|236489|estExt_fgenesh1_kg.C_150005	3.7649	6.71577	6.56314	5.13858	6.207	5.29121	0.00966141
jgi|Nemve1|81327|e_gw.4.123.1	6.28987	6.15883	5.43812	5.11052	5.17604	3.40701	0.00966186
jgi|Nemve1|242628|estExt_fgenesh1_pg.C_670098	49.4968	68.0909	62.7658	85.7247	80.4869	57.7027	0.00967654
jgi|Nemve1|222136|fgenesh1_pg.scaffold_1409000001	9.95174	19.2051	14.3165	15.626	14.4911	14.4911	0.0097045
jgi|Nemve1|183697|estExt_GenewiseH_1.C_500237	23.5215	23.8491	23.3249	21.818	36.0357	22.3421	0.00970829
jgi|Nemve1|242102|estExt_fgenesh1_pg.C_570023	48.0665	46.2901	38.4532	62.173	65.4122	45.4542	0.009713
jgi|Nemve1|112689|e_gw.113.114.1	8.66742	9.18105	6.1635	8.66742	10.7219	6.61292	0.00971533
jgi|Nemve1|111040|e_gw.103.119.1	439.282	575.742	385.876	615.654	474.949	377.704	0.00972679
jgi|Nemve1|237299|estExt_fgenesh1_kg.C_1680002	52.3507	45.7677	45.1407	71.2638	71.1593	59.3517	0.00974949
jgi|Nemve1|215851|fgenesh1_pg.scaffold_241000013	30.0535	30.8489	21.759	32.2692	21.9862	20.4523	0.00977156
jgi|Nemve1|238170|estExt_fgenesh1_pg.C_40059	14.6605	12.7575	12.1231	16.3521	21.145	15.9292	0.00978642
jgi|Nemve1|213102|fgenesh1_pg.scaffold_169000023	21.7931	22.0465	17.4218	12.7337	18.0553	15.2678	0.00979403
jgi|Nemve1|247601|estExt_fgenesh1_pg.C_3210002	49.3865	54.4433	47.9417	34.8726	66.5929	48.7297	0.00979836
jgi|Nemve1|3239|gw.414.6.1	7.82365	5.70915	4.93383	5.14528	4.51093	5.14528	0.00980819
jgi|Nemve1|83464|e_gw.7.144.1	5.56818	6.3435	5.77963	5.0748	4.08803	3.66513	0.00981266
jgi|Nemve1|137737|e_gw.410.23.1	13.3563	16.7608	22.5224	13.4436	19.467	17.7211	0.00981297
jgi|Nemve1|50744|gw.334.27.1	72.1001	47.8313	50.7847	62.9833	55.0221	40.3196	0.00981566
jgi|Nemve1|86723|e_gw.14.187.1	5.32156	5.0048	3.61106	6.77865	5.76502	6.14514	0.00982595
jgi|Nemve1|188431|estExt_GenewiseH_1.C_1220074	25.6006	23.3018	18.5996	17.2412	29.5713	20.167	0.00988384
jgi|Nemve1|160099|estExt_gwp.C_120094	15.0552	21.8158	22.4407	13.9189	16.9299	15.2256	0.00990257
jgi|Nemve1|26812|gw.44.57.1	17.1979	13.3213	13.5328	8.81041	13.3213	12.546	0.00992594
jgi|Nemve1|182833|estExt_GenewiseH_1.C_420080	16.2816	12.828	11.2773	9.3038	10.361	10.5725	0.0099393
jgi|Nemve1|70385|gw.2.582.1	9.07219	7.21267	6.19839	5.40951	9.24124	7.94521	0.00995368
jgi|Nemve1|189274|estExt_GenewiseH_1.C_1390052	51.3625	50.9131	56.884	50.3352	81.1527	70.1098	0.00997406
jgi|Nemve1|202556|fgenesh1_pg.scaffold_36000033	3.49364	5.01506	4.62062	4.56427	5.01506	2.93015	0.00998573
jgi|Nemve1|236839|estExt_fgenesh1_kg.C_590005	38.7457	55.7325	50.9603	35.5074	50.8467	61.7545	0.0100021
jgi|Nemve1|234177|estExt_fgenesh1_pm.C_130007	54.7099	44.5973	50.9603	73.7987	48.9719	42.5521	0.0100037
jgi|Nemve1|244032|estExt_fgenesh1_pg.C_1050038	30.3783	29.1801	46.1666	45.8846	34.3959	32.4928	0.0100071
jgi|Nemve1|92892|e_gw.31.166.1	13.5674	10.0863	8.30113	7.54242	10.6219	9.86317	0.0100083
jgi|Nemve1|191580|estExt_GenewiseH_1.C_2110029	77.5285	128.728	139.96	118.517	136.021	144.19	0.0100274
jgi|Nemve1|190290|estExt_GenewiseH_1.C_1670087	31.3592	33.5132	30.0288	18.182	27.4314	24.3271	0.010061
jgi|Nemve1|82504|e_gw.6.19.1	27.9768	24.9629	19.5248	30.9252	35.315	33.6115	0.0100721
jgi|Nemve1|33075|gw.18.64.1	23.4065	27.7242	17.7253	23.7474	18.1798	16.3618	0.0100965
jgi|Nemve1|201958|fgenesh1_pg.scaffold_31000118	5.5222	4.84602	2.9865	4.22618	4.62062	5.40951	0.0101026
jgi|Nemve1|217410|fgenesh1_pg.scaffold_296000016	11.0912	9.00523	9.46313	15.0596	13.3807	10.0228	0.0101071
jgi|Nemve1|10242|gw.223.3.1	13.069	15.1706	9.06294	9.654	14.6452	13.4631	0.0101488
jgi|Nemve1|229180|fgenesh1_pm.scaffold_58000014	60.4621	40.697	34.2789	54.0439	56.9612	47.6987	0.0101516
jgi|Nemve1|234206|estExt_fgenesh1_pm.C_140004	9.87014	9.10699	10.5824	14.1947	15.2631	11.0912	0.0101669
jgi|Nemve1|90669|e_gw.24.29.1	34.1467	26.9246	31.3592	28.3183	42.1924	44.5997	0.0101955
jgi|Nemve1|160631|estExt_gwp.C_140318	52.9681	40.9657	42.2054	55.222	36.8523	31.8935	0.010201
jgi|Nemve1|236760|estExt_fgenesh1_kg.C_480006	227.624	204.507	207.134	152.034	172.196	128.457	0.0102027
jgi|Nemve1|111097|e_gw.104.42.1	38.2356	49.5841	26.8872	43.9972	49.2349	41.8148	0.0102095
jgi|Nemve1|17368|gw.327.30.1	15.1702	17.7958	18.5981	19.6921	15.6078	10.5025	0.0102456
jgi|Nemve1|163128|estExt_gwp.C_370065	22.6251	29.3211	26.6427	36.8628	40.3165	30.5193	0.0102496
jgi|Nemve1|222183|fgenesh1_pg.scaffold_1447000001	2.66078	2.97754	2.47072	1.5838	2.15396	2.15396	0.0102714
jgi|Nemve1|240625|estExt_fgenesh1_pg.C_320054	45.0447	87.8198	75.6856	67.3052	73.5032	65.9958	0.0102785
jgi|Nemve1|196991|fgenesh1_pg.scaffold_4000071	9.86766	9.37428	9.86766	15.5768	13.0394	13.3213	0.0102822
jgi|Nemve1|89566|e_gw.21.52.1	4.59482	3.50082	4.74069	5.54296	4.23016	3.06322	0.0102981
jgi|Nemve1|213489|fgenesh1_pg.scaffold_177000021	66.2577	64.5117	42.164	82.6693	72.8049	69.8368	0.0103004
jgi|Nemve1|242872|estExt_fgenesh1_pg.C_740042	7.09998	8.79045	5.29681	9.74838	9.24124	7.71982	0.0103075
jgi|Nemve1|243406|estExt_fgenesh1_pg.C_880046	7.49917	7.95367	4.37452	6.36293	5.68119	5.738	0.0103089
jgi|Nemve1|243524|estExt_fgenesh1_pg.C_910030	71.0717	60.7887	73.5146	102.261	78.3436	57.7209	0.0103109
jgi|Nemve1|82150|e_gw.5.568.1	15.5063	11.9822	10.1496	8.95138	14.9425	13.1804	0.0103417
jgi|Nemve1|177334|estExt_GenewiseH_1.C_20501	74.6919	74.9453	76.2757	76.2757	74.882	120.495	0.0103496
jgi|Nemve1|202389|fgenesh1_pg.scaffold_34000091	0.898844	1.15566	1.09145	0.642031	0.83464	1.09145	0.0103526
jgi|Nemve1|246363|estExt_fgenesh1_pg.C_2130032	83.2294	127.429	127.372	132.258	103.284	82.6613	0.0103842
jgi|Nemve1|14584|gw.240.12.1	6.70553	5.91665	4.62062	5.80395	8.45235	7.60712	0.0103922
jgi|Nemve1|241970|estExt_fgenesh1_pg.C_540055	23.6153	35.8409	28.4219	39.7071	36.5723	42.6329	0.0104049
jgi|Nemve1|141906|e_gw.616.43.1	25.9457	27.4527	29.8114	25.1595	22.1456	15.5936	0.0104479
jgi|Nemve1|99547|e_gw.53.232.1	33.3486	29.9967	27.1561	18.5207	21.1908	26.872	0.0104921
jgi|Nemve1|127874|e_gw.243.71.1	114.659	121.408	87.5995	93.7584	71.2852	76.9854	0.010493
jgi|Nemve1|17185|gw.335.18.1	2.47072	2.66078	1.7105	2.66078	3.1676	2.02726	0.0105381
jgi|Nemve1|238043|estExt_fgenesh1_pg.C_30071	3.27597	3.47253	2.09662	3.47253	3.27597	2.29318	0.0105459
jgi|Nemve1|33613|gw.32.105.1	12.9093	9.62725	8.09564	7.43924	8.24151	8.16858	0.0105524
jgi|Nemve1|158170|estExt_gwp.C_30046	93.4281	82.4151	60.2433	99.9192	116.84	99.044	0.0105776
jgi|Nemve1|228652|fgenesh1_pm.scaffold_29000004	5.42721	4.86335	4.08803	2.9603	4.93383	3.73562	0.010602
jgi|Nemve1|50131|gw.135.113.1	38.7667	30.4073	42.3194	46.1856	38.6622	25.2872	0.0106095
jgi|Nemve1|85496|e_gw.11.188.1	2.67778	3.21334	3.34723	3.61501	2.45463	2.00834	0.0106133
jgi|Nemve1|203470|fgenesh1_pg.scaffold_43000053	217.59	172.84	134.053	187.713	171.202	120.294	0.0106238
jgi|Nemve1|240728|estExt_fgenesh1_pg.C_330073	45.2632	47.4461	36.5316	60.8003	66.0008	47.1251	0.0106468
jgi|Nemve1|120884|e_gw.175.104.1	4.37452	7.89685	5.28351	6.47656	6.30612	7.55598	0.0106603
jgi|Nemve1|241346|estExt_fgenesh1_pg.C_440017	14.8761	13.4111	9.91743	8.396	11.7769	14.2	0.0106703
jgi|Nemve1|204316|fgenesh1_pg.scaffold_49000125	24.8339	22.1732	20.7794	15.9647	16.5982	14.3175	0.0106716
jgi|Nemve1|87891|e_gw.17.73.1	7.15877	6.84201	7.98234	7.15877	5.76502	4.18123	0.0106811
jgi|Nemve1|124585|e_gw.212.46.1	29.757	21.0049	19.4004	29.3194	28.0795	34.4247	0.0106837
jgi|Nemve1|222412|fgenesh1_pg.scaffold_1602000002	6.58302	8.35939	6.37404	4.49317	5.5381	7.52345	0.0106911
jgi|Nemve1|238804|estExt_fgenesh1_pg.C_80203	71.2655	97.1393	76.4659	74.3472	66.1292	49.4364	0.0107096
jgi|Nemve1|104083|e_gw.71.100.1	66.4454	82.2173	65.1226	99.7699	94.9874	110.556	0.0107216
jgi|Nemve1|209785|fgenesh1_pg.scaffold_111000044	18.594	29.0696	25.9269	22.0859	33.8708	30.6409	0.0107303
jgi|Nemve1|242763|estExt_fgenesh1_pg.C_710070	20.2527	38.5848	27.2363	33.9581	33.8708	29.1569	0.0107403
jgi|Nemve1|105659|e_gw.78.97.1	99.9192	88.8333	80.3	68.5577	125.665	108.452	0.010744
jgi|Nemve1|121424|e_gw.179.22.1	11.2852	10.9717	7.31447	6.68751	9.6133	8.04591	0.0107442
jgi|Nemve1|226311|fgenesh1_kg.scaffold_11000013	2.97754	2.47072	2.59743	4.05452	3.1676	2.28067	0.0107455
jgi|Nemve1|234148|estExt_fgenesh1_pm.C_120001	40.1562	36.9262	45.6558	50.8063	65.7339	56.2186	0.0107846
jgi|Nemve1|244512|estExt_fgenesh1_pg.C_1240041	29.0696	46.005	32.1249	52.1157	42.164	43.3861	0.0107916
jgi|Nemve1|99968|e_gw.55.94.1	53.7224	41.4955	32.3095	42.2557	60.5011	46.6904	0.0107937
jgi|Nemve1|202774|fgenesh1_pg.scaffold_38000004	4.53147	3.54637	4.72849	2.69261	4.40012	3.218	0.0108604
jgi|Nemve1|245652|estExt_fgenesh1_pg.C_1710017	14.9736	25.547	28.3053	27.5829	28.3053	24.5619	0.0108693
jgi|Nemve1|248008|estExt_fgenesh1_pg.C_3900015	18.0834	23.1939	18.411	31.3838	26.4043	26.6009	0.0108734
jgi|Nemve1|195684|estExt_GenewiseH_1.C_11330006	29.9019	30.3928	27.4919	28.6969	46.4595	38.9171	0.0108777
jgi|Nemve1|204462|fgenesh1_pg.scaffold_51000044	5.47003	8.75205	4.74069	6.63697	6.56404	5.68883	0.0108882
jgi|Nemve1|240335|estExt_fgenesh1_pg.C_270103	39.8943	40.5053	48.2747	46.2669	32.9979	26.1888	0.0108973
jgi|Nemve1|87118|e_gw.15.56.1	5.83123	6.09331	9.4348	9.17273	9.63136	8.71409	0.0109084
jgi|Nemve1|167409|estExt_gwp.C_870132	237.672	306.695	194.197	188.877	179.814	191.964	0.0109103
jgi|Nemve1|99661|e_gw.53.58.1	9.59539	7.94409	7.23001	7.05149	6.24816	4.99853	0.0109143
jgi|Nemve1|104172|e_gw.72.97.1	14.9276	15.2768	12.2214	18.594	22.4351	19.6416	0.0109251
jgi|Nemve1|140376|e_gw.519.18.1	16.4226	18.819	11.3478	14.6605	12.6165	10.9249	0.0109464
jgi|Nemve1|202958|fgenesh1_pg.scaffold_39000041	0.0892594	0.0892594	0.0892594	0.0892594	0.133889	0.133889	0.0109502
jgi|Nemve1|25207|gw.149.52.1	8.52848	7.40075	5.99108	10.0791	10.9249	10.0791	0.0109779
jgi|Nemve1|80092|e_gw.2.81.1	92.3193	68.0607	57.2664	97.8869	100.103	75.1621	0.0109874
jgi|Nemve1|181966|estExt_GenewiseH_1.C_330038	37.8014	34.1864	38.8278	41.0593	58.6881	53.3325	0.0110087
jgi|Nemve1|89527|e_gw.21.123.1	6.24931	7.1583	9.48759	4.94264	6.41975	6.47656	0.0110119
jgi|Nemve1|127262|e_gw.236.35.1	34.6535	49.4778	35.7305	59.9943	47.7673	39.0881	0.0110187
jgi|Nemve1|83602|e_gw.8.289.1	10.912	12.6579	7.68205	10.039	14.4911	9.77715	0.0110255
jgi|Nemve1|246324|estExt_fgenesh1_pg.C_2110028	76.9064	89.4455	92.0578	49.1114	71.0548	66.6661	0.0110278
jgi|Nemve1|220553|fgenesh1_pg.scaffold_538000006	10.8368	10.7859	9.51401	5.59647	9.56488	9.36137	0.0110376
jgi|Nemve1|248552|estExt_fgenesh1_pg.C_6580003	5.4336	6.8965	7.31447	10.4492	8.67287	7.83693	0.0110764
jgi|Nemve1|232789|fgsh_est.C_scaffold_82000008	5.76176	4.88656	6.85577	7.94978	5.25123	4.52189	0.0110946
jgi|Nemve1|164913|estExt_gwp.C_540212	42.5719	42.5719	27.3475	33.973	33.832	24.7396	0.0111317
jgi|Nemve1|180796|estExt_GenewiseH_1.C_220194	27.4401	34.2008	27.7242	17.5549	25.7358	22.3271	0.0111323
jgi|Nemve1|243247|estExt_fgenesh1_pg.C_830039	51.2341	45.0064	26.7727	34.6697	43.5297	38.3935	0.01114
jgi|Nemve1|238777|estExt_fgenesh1_pg.C_80108	38.0724	41.6036	40.3838	47.6387	31.5879	24.9108	0.0111565
jgi|Nemve1|103213|e_gw.67.215.1	127.342	107.213	88.031	157.61	122.966	92.9176	0.0111721
jgi|Nemve1|242089|estExt_fgenesh1_pg.C_560091	14.5138	19.9838	14.4409	14.7326	17.0665	10.0649	0.0111978
jgi|Nemve1|127236|e_gw.236.36.1	6.42379	9.01584	5.8603	9.41029	6.02935	6.25474	0.0111997
jgi|Nemve1|204286|fgenesh1_pg.scaffold_49000095	25.9379	37.0037	21.286	26.0788	20.5106	25.5854	0.0112039
jgi|Nemve1|228171|fgenesh1_pm.scaffold_8000042	85.4374	61.8504	81.8993	117.149	75.8715	74.3646	0.0112403
jgi|Nemve1|216000|fgenesh1_pg.scaffold_245000036	366.302	250.78	256.841	196.507	219.062	265.017	0.0112597
jgi|Nemve1|241359|estExt_fgenesh1_pg.C_440050	76.5586	93.3194	100.478	52.203	81.7963	70.7971	0.0112851
jgi|Nemve1|167786|estExt_gwp.C_920211	101.068	93.8533	95.2168	76.0711	66.5836	57.0392	0.0112963
jgi|Nemve1|30351|gw.13.15.1	28.0332	32.1034	18.8754	28.0332	23.1491	18.7736	0.0112973
jgi|Nemve1|238636|estExt_fgenesh1_pg.C_70083	92.9982	91.5353	67.6066	97.5959	117.658	65.9347	0.0113072
jgi|Nemve1|247377|estExt_fgenesh1_pg.C_2960021	37.9307	36.2589	40.1251	24.4512	31.2432	23.6153	0.0113151
jgi|Nemve1|81748|e_gw.4.615.1	31.6681	38.7118	38.3173	36.8523	24.7936	22.8777	0.0113208
jgi|Nemve1|94211|e_gw.35.47.1	38.3613	62.5788	42.3297	66.2928	63.9016	56.7788	0.0113296
jgi|Nemve1|126194|e_gw.229.78.1	3.48112	3.92741	2.67778	4.19519	4.59686	5.17705	0.0113429
jgi|Nemve1|238305|estExt_fgenesh1_pg.C_50011	135.187	154.852	179.098	240.137	175.151	228.789	0.0113727
jgi|Nemve1|199227|fgenesh1_pg.scaffold_13000234	15.5523	10.65	12.5658	14.9325	12.5095	8.28331	0.0113815
jgi|Nemve1|168568|estExt_gwp.C_1080157	67.8156	49.2159	37.8262	42.1104	61.8595	50.1563	0.0113978
jgi|Nemve1|90548|e_gw.24.261.1	20.1582	14.0967	14.1671	15.9997	21.7089	23.4709	0.0114204
jgi|Nemve1|9801|gw.16082.3.1	0.676188	0.56349	0.56349	0.619839	0.394443	0.394443	0.0114221
jgi|Nemve1|122949|e_gw.195.33.1	4.92551	2.62694	4.99119	3.67772	4.26878	4.4658	0.0114375
jgi|Nemve1|121733|e_gw.182.87.1	5.54296	5.03243	4.15722	4.01135	6.19937	7.07457	0.0114493
jgi|Nemve1|245154|estExt_fgenesh1_pg.C_1480002	10.8511	14.7711	11.2488	14.487	18.9184	17.4981	0.0114574
jgi|Nemve1|196591|fgenesh1_pg.scaffold_2000213	4.55223	6.29279	9.19372	7.14075	7.09612	6.56057	0.0114589
jgi|Nemve1|245617|estExt_fgenesh1_pg.C_1690040	11.2698	9.18489	10.1992	14.4817	12.3968	7.66347	0.0114668
jgi|Nemve1|64073|gw.32.293.1	8.39471	11.7017	10.0228	15.0596	14.6526	10.9386	0.011469
jgi|Nemve1|242754|estExt_fgenesh1_pg.C_710048	7.79682	11.3349	12.1211	15.7247	13.6281	12.9729	0.0114821
jgi|Nemve1|99774|e_gw.54.20.1	8.35939	7.31447	5.5381	7.41896	10.9717	8.35939	0.0114833
jgi|Nemve1|80875|e_gw.3.408.1	24.2992	17.0751	14.5795	15.696	24.5619	19.8991	0.011491
jgi|Nemve1|171781|estExt_gwp.C_1880051	1.96558	1.90006	2.6863	3.0139	2.81734	1.83455	0.0114937
jgi|Nemve1|247106|estExt_fgenesh1_pg.C_2690025	10.2107	10.9401	12.3258	7.65804	15.1702	12.4717	0.0115031
jgi|Nemve1|240395|estExt_fgenesh1_pg.C_280078	129.239	116.913	109.036	150.025	113.193	73.9548	0.0115179
jgi|Nemve1|217624|fgenesh1_pg.scaffold_305000004	26.2017	22.5894	13.7877	21.2157	27.2192	24.0648	0.0115823
jgi|Nemve1|166550|estExt_gwp.C_750035	11.5585	13.9885	7.94649	13.2004	10.9675	15.5646	0.011584
jgi|Nemve1|193830|estExt_GenewiseH_1.C_3140076	30.1701	26.4052	22.9455	17.9596	21.4192	16.7894	0.0115884
jgi|Nemve1|82156|e_gw.5.77.1	101.962	66.1704	63.5515	102.835	100.914	74.9	0.0115914
jgi|Nemve1|175935|estExt_gwp.C_4990026	29.3624	34.378	21.8389	21.6299	25.7051	19.0176	0.0116018
jgi|Nemve1|55712|gw.211.83.1	2.47975	1.53161	2.47975	1.75041	2.69855	1.89628	0.0116053
jgi|Nemve1|244685|estExt_fgenesh1_pg.C_1300038	91.2243	103.795	107.374	108.858	155.911	152.07	0.0116298
jgi|Nemve1|83186|e_gw.7.385.1	14.2598	19.8274	16.6459	15.3392	22.952	24.77	0.0116697
jgi|Nemve1|96788|e_gw.44.51.1	3.85219	4.87944	2.88914	5.00784	5.64987	4.75103	0.0116769
jgi|Nemve1|164471|estExt_gwp.C_500247	41.2037	42.3386	38.4102	52.0284	62.8531	64.1626	0.0116976
jgi|Nemve1|106275|e_gw.80.23.1	15.2634	19.9941	16.6023	16.513	27.4473	18.6106	0.0117057
jgi|Nemve1|240237|estExt_fgenesh1_pg.C_260079	114.163	131.434	99.5689	71.0951	78.8607	100.997	0.0117078
jgi|Nemve1|48709|gw.12488.2.1	9.05611	10.9894	7.27542	12.7701	12.6684	13.3298	0.01171
jgi|Nemve1|222202|fgenesh1_pg.scaffold_1455000001	7.57597	12.2628	9.37365	10.2725	8.08959	6.61292	0.011739
jgi|Nemve1|104042|e_gw.71.195.1	95.1526	72.6303	63.5515	84.6771	56.3932	54.56	0.0118412
jgi|Nemve1|228429|fgenesh1_pm.scaffold_17000023	41.6049	30.139	28.3044	21.5559	25.1595	30.7286	0.0118651
jgi|Nemve1|246756|estExt_fgenesh1_pg.C_2390019	17.1301	27.611	29.3578	17.0738	23.5539	24.7372	0.0118689
jgi|Nemve1|197055|fgenesh1_pg.scaffold_4000135	5.16988	7.6128	7.1583	10.3966	8.86266	7.6128	0.0118718
jgi|Nemve1|117787|e_gw.149.136.1	18.0553	15.2678	12.607	17.5485	12.9871	9.69284	0.0118831
jgi|Nemve1|44064|gw.348.38.1	13.8246	15.7902	15.5281	12.4487	15.2005	8.12441	0.0119185
jgi|Nemve1|244413|estExt_fgenesh1_pg.C_1210003	17.2721	17.7318	13.6601	16.6811	25.8754	21.8036	0.0119208
jgi|Nemve1|242991|estExt_fgenesh1_pg.C_760086	17.6592	24.7647	27.795	22.1524	33.2286	31.4522	0.0119209
jgi|Nemve1|116745|e_gw.141.4.1	115.554	88.3759	62.2749	119.355	101.173	85.9685	0.0119463
jgi|Nemve1|160179|estExt_gwp.C_120310	40.8974	38.5219	28.8914	38.0724	57.9112	41.6678	0.0119642
jgi|Nemve1|20592|gw.88.43.1	3.60357	5.11052	3.80013	2.6863	4.06221	4.97948	0.0120095
jgi|Nemve1|167407|estExt_gwp.C_870096	36.5723	45.5587	71.3683	48.6935	53.1866	59.1427	0.0120315
jgi|Nemve1|243613|estExt_fgenesh1_pg.C_930024	2.18498	2.74885	2.46692	2.1145	3.52417	3.52417	0.0120381
jgi|Nemve1|122519|e_gw.191.65.1	0.937224	1.33889	0.803335	1.07111	1.38352	1.42815	0.0120386
jgi|Nemve1|170431|estExt_gwp.C_1480001	15.1895	16.7608	18.5068	22.0859	24.6175	27.3236	0.0120462
jgi|Nemve1|171933|estExt_gwp.C_1940073	49.846	39.3705	38.8467	48.7112	36.4897	25.5777	0.0120858
jgi|Nemve1|186234|estExt_GenewiseH_1.C_800284	25.9381	34.4771	25.6812	24.2046	43.0161	30.5607	0.0120902
jgi|Nemve1|243590|estExt_fgenesh1_pg.C_920066	30.6623	31.866	24.3271	17.0417	32.7529	25.4675	0.0121284
jgi|Nemve1|172167|estExt_gwp.C_2050008	16.2181	22.1098	24.7072	14.1908	16.4081	15.2678	0.0121406
jgi|Nemve1|174677|estExt_gwp.C_3180056	16.0918	25.9141	13.793	20.4805	19.7491	16.0918	0.0121592
jgi|Nemve1|28213|gw.156.95.1	15.7783	10.7627	9.71779	10.1358	10.3447	8.2549	0.0121617
jgi|Nemve1|163220|estExt_gwp.C_380093	62.2775	55.172	53.9181	56.0079	93.2072	75.4435	0.0121718
jgi|Nemve1|130825|e_gw.286.9.1	21.6384	16.1407	19.7353	30.3078	27.8409	26.0083	0.0122103
jgi|Nemve1|215187|fgenesh1_pg.scaffold_220000023	4.15056	5.98038	3.43649	5.08779	6.56057	5.04316	0.0122335
jgi|Nemve1|159311|estExt_gwp.C_70118	77.9513	114.106	111.598	141.901	98.2228	80.0412	0.0122375
jgi|Nemve1|212694|fgenesh1_pg.scaffold_161000010	223.255	211.591	264.615	384.357	327.219	274.307	0.0122442
jgi|Nemve1|229200|fgenesh1_pm.scaffold_59000018	4.6519	5.99108	4.79286	3.73562	4.93383	3.03078	0.0122488
jgi|Nemve1|20223|gw.180.36.1	102.194	120.166	65.2032	68.965	93.8342	92.6847	0.0122609
jgi|Nemve1|243769|estExt_fgenesh1_pg.C_980027	51.3903	54.2641	50.3197	70.8871	53.2498	33.584	0.0122763
jgi|Nemve1|232854|fgsh_est.C_scaffold_90000001	41.44	50.5029	43.2132	30.0128	32.6397	28.371	0.0123121
jgi|Nemve1|164652|estExt_gwp.C_520182	28.6988	23.3699	15.473	27.9926	30.6891	22.7921	0.0123279
jgi|Nemve1|168581|estExt_gwp.C_1090036	17.5841	26.2869	29.7234	36.9534	29.3664	27.001	0.0123311
jgi|Nemve1|197387|fgenesh1_pg.scaffold_5000193	1.97353	1.2687	1.2687	1.48015	1.97353	2.1145	0.012343
jgi|Nemve1|210239|fgenesh1_pg.scaffold_119000001	9.7267	8.458	6.55495	5.21576	9.7267	7.89413	0.0123463
jgi|Nemve1|120618|e_gw.172.36.1	4.24458	5.06815	3.54771	7.03206	5.32156	5.19486	0.0123492
jgi|Nemve1|237766|estExt_fgenesh1_pg.C_10138	176.383	174.92	150.051	102.925	213.791	179.831	0.0123509
jgi|Nemve1|240152|estExt_fgenesh1_pg.C_250079	80.1616	66.4699	81.6955	126.691	94.7054	78.6845	0.0123663
jgi|Nemve1|29018|gw.132.84.1	2.88914	4.43001	3.46697	5.07205	5.13625	3.46697	0.0124011
jgi|Nemve1|231729|fgsh_est.C_scaffold_2000015	36.5145	31.2606	19.8334	23.9708	35.7264	33.7562	0.0124367
jgi|Nemve1|242789|estExt_fgenesh1_pg.C_720035	9.91899	7.07457	10.7213	5.6159	8.09564	7.51217	0.0124399
jgi|Nemve1|242013|estExt_fgenesh1_pg.C_550049	13.5333	10.7859	15.2122	20.2999	12.7701	12.1087	0.0124466
jgi|Nemve1|178345|estExt_GenewiseH_1.C_60248	49.9333	43.2988	72.9795	74.2889	47.5763	53.687	0.0124523
jgi|Nemve1|164098|estExt_gwp.C_460303	15.7616	24.1022	30.6038	31.9173	25.8754	25.1529	0.0124635
jgi|Nemve1|28225|gw.205.66.1	17.7318	27.1232	25.744	16.9438	19.6364	15.696	0.01247
jgi|Nemve1|182461|estExt_GenewiseH_1.C_380109	7.72893	9.24938	8.93262	8.93262	6.84201	4.75139	0.0124727
jgi|Nemve1|242443|estExt_fgenesh1_pg.C_630074	6.31109	7.77616	9.52298	4.84602	8.67775	8.22696	0.0124762
jgi|Nemve1|202723|fgenesh1_pg.scaffold_37000098	0.814033	1.52631	0.966664	0.915787	1.22105	1.17017	0.0124814
jgi|Nemve1|214518|fgenesh1_pg.scaffold_202000022	96.3791	103.979	66.2402	92.6445	68.7299	58.9675	0.0124821
jgi|Nemve1|91173|e_gw.26.132.1	14.5867	20.2026	13.6386	25.5268	18.5252	20.859	0.0124968
jgi|Nemve1|82503|e_gw.6.151.1	3.13615	2.84442	1.75041	1.89628	2.91735	2.69855	0.0125063
jgi|Nemve1|193205|estExt_GenewiseH_1.C_2800055	47.4459	62.6038	71.0561	91.1727	88.8061	79.6775	0.0125325
jgi|Nemve1|168440|estExt_gwp.C_1040159	32.1753	29.9777	23.2721	42.2618	36.3451	23.9483	0.0125464
jgi|Nemve1|236766|estExt_fgenesh1_kg.C_480012	529.544	410.75	519.545	779.857	486.48	466.255	0.0125554
jgi|Nemve1|172695|estExt_gwp.C_2210008	218.589	206.106	151.109	110.866	187.075	193.011	0.0125825
jgi|Nemve1|128801|e_gw.255.62.1	48.842	49.2998	47.2648	44.7209	28.6946	30.5262	0.0125932
jgi|Nemve1|114223|e_gw.124.52.1	13.8037	11.7492	10.4651	7.51176	10.6577	7.76858	0.0126102
jgi|Nemve1|218550|fgenesh1_pg.scaffold_353000017	2.53571	2.8738	1.74682	3.26824	3.54999	2.6484	0.0126151
jgi|Nemve1|245375|estExt_fgenesh1_pg.C_1570033	35.7347	31.8147	34.0303	33.8599	41.3023	19.316	0.0126805
jgi|Nemve1|186704|estExt_GenewiseH_1.C_880277	33.7666	40.5452	37.441	23.5036	49.4145	36.5541	0.0126846
jgi|Nemve1|238287|estExt_fgenesh1_pg.C_40251	6.87954	11.0073	8.58305	5.89675	9.30377	6.81403	0.0127087
jgi|Nemve1|184426|estExt_GenewiseH_1.C_570174	123.398	130.268	124.361	71.6507	152.611	135.918	0.0127116
jgi|Nemve1|172704|estExt_gwp.C_2210017	31.3919	32.1143	33.8875	25.2843	49.9775	32.7054	0.0127138
jgi|Nemve1|246192|estExt_fgenesh1_pg.C_2020031	144.117	124.863	127.051	213.404	139.23	194.733	0.0127158
jgi|Nemve1|207102|fgenesh1_pg.scaffold_76000086	21.5154	31.6532	22.3177	27.1313	23.2659	15.4619	0.0127308
jgi|Nemve1|248001|estExt_fgenesh1_pg.C_3890003	25.0892	30.851	22.4636	22.7553	38.6549	35.5917	0.0127468
jgi|Nemve1|20073|gw.193.26.1	104.373	117.607	85.5684	161.964	148.14	144.667	0.0127498
jgi|Nemve1|223715|fgenesh1_pg.scaffold_3219000002	1.22105	1.52631	1.01754	0.763155	1.3228	1.37368	0.0127545
jgi|Nemve1|238632|estExt_fgenesh1_pg.C_70067	44.7569	62.7301	74.0075	58.2897	44.0521	41.8671	0.0127621
jgi|Nemve1|191780|estExt_GenewiseH_1.C_2170106	34.587	24.7647	23.4063	36.3633	39.0802	23.8243	0.0127627
jgi|Nemve1|237413|estExt_fgenesh1_kg.C_2290002	24.2463	19.3124	20.0877	33.4796	28.1228	32.8452	0.0127875
jgi|Nemve1|238787|estExt_fgenesh1_pg.C_80160	14.3168	11.2302	9.25996	15.0392	17.2721	17.1408	0.0127937
jgi|Nemve1|201307|fgenesh1_pg.scaffold_27000070	4.47718	5.13858	3.96841	2.84911	3.91753	2.84911	0.0127951
jgi|Nemve1|101127|e_gw.59.140.1	17.0665	24.0681	28.0066	31.1427	31.945	34.06	0.0128014
jgi|Nemve1|143309|e_gw.777.2.1	11.6977	9.42797	6.19802	8.20582	7.15827	7.15827	0.0128415
jgi|Nemve1|34681|gw.9.121.1	4.4521	5.15046	4.19021	7.07098	3.66643	4.80128	0.0128451
jgi|Nemve1|239928|estExt_fgenesh1_pg.C_220024	2.7611	3.43729	4.90236	5.07141	3.88808	3.32459	0.012846
jgi|Nemve1|189570|estExt_GenewiseH_1.C_1450077	37.7992	37.1008	21.5621	38.5848	33.1725	24.4429	0.0128495
jgi|Nemve1|35599|gw.12.191.1	11.7031	8.56838	5.5381	9.92678	8.35939	8.67287	0.0128521
jgi|Nemve1|225670|fgenesh1_pg.scaffold_10309000001	15.3654	11.1364	10.4315	18.7486	16.916	12.546	0.0128551
jgi|Nemve1|190388|estExt_GenewiseH_1.C_1700071	69.2785	61.546	39.7071	56.2169	82.34	69.9054	0.0128575
jgi|Nemve1|18593|gw.390.35.1	2.79347	4.19021	2.44429	4.53939	3.31725	3.92832	0.0128602
jgi|Nemve1|178046|estExt_GenewiseH_1.C_50287	18.3229	22.6574	24.1022	13.3317	26.6634	24.3649	0.0128662
jgi|Nemve1|170833|estExt_gwp.C_1580031	42.4953	40.1092	40.2796	29.9967	61.016	48.8014	0.0128735
jgi|Nemve1|81177|e_gw.4.609.1	4.78244	5.29121	4.01929	3.61227	3.51052	2.69648	0.0128774
jgi|Nemve1|160127|estExt_gwp.C_120132	22.3706	20.3983	16.623	14.0309	15.5523	11.7769	0.0128842
jgi|Nemve1|167719|estExt_gwp.C_920046	123.142	182.144	149.722	183.878	126.48	100.221	0.0128936
jgi|Nemve1|246561|estExt_fgenesh1_pg.C_2260032	15.665	17.7499	20.3983	10.3682	20.8491	15.8904	0.0128946
jgi|Nemve1|208153|fgenesh1_pg.scaffold_89000015	17.7253	20.3955	15.396	19.3729	12.4986	11.1351	0.0128999
jgi|Nemve1|111102|e_gw.104.268.1	26.0186	26.6456	25.9141	20.4805	18.2862	14.3155	0.0129465
jgi|Nemve1|247897|estExt_fgenesh1_pg.C_3740001	5.79481	5.79481	5.96525	3.40871	7.44236	6.07887	0.012951
jgi|Nemve1|197450|fgenesh1_pg.scaffold_5000256	5.25821	7.79229	6.65195	4.24458	4.81475	4.81475	0.0129754
jgi|Nemve1|168881|estExt_gwp.C_1160032	71.0589	88.3435	55.8694	44.1718	74.3762	76.2967	0.0129847
jgi|Nemve1|166299|estExt_gwp.C_710198	35.4806	39.4973	33.6954	25.1712	49.8514	46.3256	0.0129895
jgi|Nemve1|220979|fgenesh1_pg.scaffold_617000001	10.8247	10.1263	7.42016	6.5472	7.24557	6.19802	0.0130037
jgi|Nemve1|146277|e_gw.1630.4.1	5.49472	8.03857	8.39471	5.0877	9.25962	8.34383	0.013009
jgi|Nemve1|175253|estExt_gwp.C_3760026	71.2335	67.9163	76.7332	118.723	110.342	86.8595	0.0130119
jgi|Nemve1|83019|e_gw.6.346.1	36.5723	40.2296	33.6465	24.5557	51.6192	38.4532	0.0130159
jgi|Nemve1|238788|estExt_fgenesh1_pg.C_80161	11.1128	15.7989	8.74742	8.30113	11.5145	10.7558	0.0130284
jgi|Nemve1|90876|e_gw.25.151.1	20.3697	33.4796	23.6119	16.7045	22.3432	25.9379	0.013033
jgi|Nemve1|100445|e_gw.57.113.1	9.8829	12.4803	8.99597	9.18603	8.2991	5.89173	0.0130396
jgi|Nemve1|248537|estExt_fgenesh1_pg.C_6350001	68.126	76.5783	90.1584	125.602	118.389	94.2719	0.0130436
jgi|Nemve1|248149|estExt_fgenesh1_pg.C_4300003	228.675	194.525	134.893	120.511	168.978	196.561	0.0130646
jgi|Nemve1|245328|estExt_fgenesh1_pg.C_1550040	72.2394	97.7655	93.2576	68.5768	66.3228	50.7141	0.0130673
jgi|Nemve1|180659|estExt_GenewiseH_1.C_210104	45.4377	47.9904	45.0001	33.4766	35.5917	24.7975	0.0130715
jgi|Nemve1|238857|estExt_fgenesh1_pg.C_90050	28.1787	33.0077	17.9526	25.679	24.9404	18.2366	0.0130749
jgi|Nemve1|137206|e_gw.393.3.1	68.8258	124.517	84.7188	127.013	125.108	103.633	0.0131067
jgi|Nemve1|172456|estExt_gwp.C_2130078	52.5852	48.8656	39.603	41.3534	38.5819	25.308	0.0131246
jgi|Nemve1|16838|gw.183.42.1	0.340871	0.397683	0.454495	0.227248	0.340871	0.28406	0.0131318
jgi|Nemve1|238117|estExt_fgenesh1_pg.C_30209	49.6998	54.0387	56.18	55.1093	42.7126	28.0618	0.0131351
jgi|Nemve1|98739|e_gw.50.284.1	6.61292	5.20045	4.75103	4.23741	3.65958	3.59537	0.0131382
jgi|Nemve1|176889|estExt_GenewiseH_1.C_10022	48.4844	53.857	30.7942	48.5499	63.7504	60.671	0.0131476
jgi|Nemve1|220533|fgenesh1_pg.scaffold_535000007	1.83322	3.75373	3.14266	3.57914	2.79347	2.79347	0.0131509
jgi|Nemve1|89877|e_gw.22.210.1	0.626954	0.940431	0.522462	0.626954	0.731447	0.940431	0.0131753
jgi|Nemve1|96651|e_gw.43.119.1	0.655195	0.655195	0.393117	0.589675	0.458636	0.393117	0.0132088
jgi|Nemve1|160554|estExt_gwp.C_140177	46.3655	65.5422	70.8617	52.1448	82.4859	85.7696	0.0132232
jgi|Nemve1|240003|estExt_fgenesh1_pg.C_230020	59.044	60.8178	34.21	66.963	48.0207	67.8499	0.0132396
jgi|Nemve1|207809|fgenesh1_pg.scaffold_84000065	1.69047	2.70475	1.91587	1.57777	2.7611	1.97222	0.0132884
jgi|Nemve1|167625|estExt_gwp.C_910013	78.5141	82.15	78.6845	132.542	101.352	72.9465	0.0132908
jgi|Nemve1|50030|gw.118.88.1	69.4003	61.5437	35.4422	44.7828	54.4727	45.6558	0.0132968
jgi|Nemve1|203127|fgenesh1_pg.scaffold_40000095	33.1241	47.6485	40.543	50.8878	66.6661	55.6944	0.0133244
jgi|Nemve1|221945|fgenesh1_pg.scaffold_1149000001	7.21511	4.09046	4.09046	5.11307	5.11307	4.03365	0.0133259
jgi|Nemve1|167736|estExt_gwp.C_920069	28.4753	28.8982	17.9732	32.4223	24.8101	18.3257	0.0133272
jgi|Nemve1|137669|e_gw.408.18.1	11.8896	12.6222	12.8476	17.6372	14.4253	8.28331	0.0133358
jgi|Nemve1|243738|estExt_fgenesh1_pg.C_970043	10.7219	19.6462	20.1598	12.5196	16.115	16.436	0.0133529
jgi|Nemve1|146411|e_gw.1674.2.1	0.802271	0.510536	0.729337	0.802271	0.875205	1.09401	0.0133563
jgi|Nemve1|21219|gw.109.31.1	30.0785	32.6397	27.0575	18.914	19.6364	20.1618	0.0133635
jgi|Nemve1|93721|e_gw.33.64.1	185.445	188.431	171.808	152.649	266.475	270.194	0.0134013
jgi|Nemve1|158054|estExt_gwp.C_20454	42.0412	55.8764	42.2197	40.0775	36.1501	26.153	0.0134059
jgi|Nemve1|161775|estExt_gwp.C_240220	171.408	285.877	243.714	211.469	161.228	165.366	0.0134105
jgi|Nemve1|93827|e_gw.34.45.1	8.81041	10.9954	8.66945	8.95138	9.51525	5.00431	0.0134106
jgi|Nemve1|104332|e_gw.72.91.1	1.21986	0.963047	0.642031	1.15566	1.21986	0.83464	0.0134303
jgi|Nemve1|167428|estExt_gwp.C_880054	36.641	59.4468	44.0942	36.5071	64.4453	46.9505	0.013464
jgi|Nemve1|246640|estExt_fgenesh1_pg.C_2300026	9.86317	16.8254	12.4071	18.1643	18.1197	12.7195	0.0134684
jgi|Nemve1|20064|gw.83.4.1	33.8299	33.4498	22.9334	31.866	27.5581	17.6118	0.0134697
jgi|Nemve1|236362|estExt_fgenesh1_kg.C_50019	21.0586	37.3662	34.7981	26.7727	33.9634	22.0217	0.0134717
jgi|Nemve1|209013|fgenesh1_pg.scaffold_100000019	151.198	146.383	90.9758	100.349	155.179	100.414	0.0134836
jgi|Nemve1|242257|estExt_fgenesh1_pg.C_600014	4.6519	4.36997	5.85011	3.10127	3.3832	3.59465	0.0134958
jgi|Nemve1|96298|e_gw.42.58.1	13.7485	11.1351	11.5896	17.8389	13.4644	8.69222	0.0134964
jgi|Nemve1|231995|fgsh_est.C_scaffold_13000020	9.18965	15.4619	11.2318	11.7423	12.6175	7.65804	0.0135005
jgi|Nemve1|201826|fgenesh1_pg.scaffold_30000177	12.6704	17.2317	18.3721	13.3039	12.5437	9.31273	0.0135011
jgi|Nemve1|239961|estExt_fgenesh1_pg.C_220093	41.1787	48.3375	46.7537	71.2709	69.1169	44.6631	0.0135012
jgi|Nemve1|191317|estExt_GenewiseH_1.C_2010031	1.36349	2.55654	1.76117	1.64755	1.81798	2.44291	0.0135038
jgi|Nemve1|110469|e_gw.100.124.1	11.7835	11.4667	12.9238	6.90536	9.81955	14.5076	0.0135322
jgi|Nemve1|98446|e_gw.49.51.1	43.3327	52.1386	31.866	25.8476	43.9662	39.3415	0.0135464
jgi|Nemve1|94829|e_gw.37.73.1	28.1093	25.1412	14.9276	29.1569	22.0859	30.5536	0.0135509
jgi|Nemve1|246278|estExt_fgenesh1_pg.C_2090006	15.112	18.8047	19.1456	9.26034	17.2708	17.8957	0.0135675
jgi|Nemve1|1760|gw.418.9.1	1.24986	1.87479	0.965802	1.76117	1.76117	1.4203	0.0135681
jgi|Nemve1|165941|estExt_gwp.C_660185	85.7701	91.386	85.7701	83.2174	137.48	133.031	0.0135711
jgi|Nemve1|164341|estExt_gwp.C_490049	12.7641	15.7097	16.4237	8.12261	13.6567	11.1574	0.0135754
jgi|Nemve1|242155|estExt_fgenesh1_pg.C_580013	86.7962	62.4261	57.5419	40.6507	65.9875	57.6437	0.0135994
jgi|Nemve1|174565|estExt_gwp.C_3130001	26.049	19.6894	23.4543	24.5736	21.8771	12.3631	0.0136055
jgi|Nemve1|124290|e_gw.209.10.1	59.6289	58.0782	37.8495	37.6381	58.7831	68.1574	0.0136061
jgi|Nemve1|172491|estExt_gwp.C_2140089	58.0782	49.6202	53.8492	29.8144	36.017	45.2503	0.0136126
jgi|Nemve1|183153|estExt_GenewiseH_1.C_440230	58.1487	74.5009	90.0777	49.4793	58.9945	50.5365	0.0136171
jgi|Nemve1|240518|estExt_fgenesh1_pg.C_300161	510.507	432.29	378.952	433.512	657.95	678.464	0.013621
jgi|Nemve1|60575|gw.17.270.1	23.6153	32.3926	20.8985	15.2559	22.0479	25.2872	0.0136437
jgi|Nemve1|79604|e_gw.1.682.1	45.1177	40.2579	29.159	35.0696	53.1955	29.2904	0.0136497
jgi|Nemve1|220298|fgenesh1_pg.scaffold_498000013	1.60508	2.82494	2.50392	2.76073	1.73348	1.92609	0.0136531
jgi|Nemve1|243700|estExt_fgenesh1_pg.C_960008	44.9165	48.2742	27.6848	29.7754	40.7986	29.4586	0.013675
jgi|Nemve1|224718|fgenesh1_pg.scaffold_5613000001	3.47253	5.30708	4.3898	2.48974	3.93117	3.86565	0.0136768
jgi|Nemve1|210242|fgenesh1_pg.scaffold_119000004	56.5304	55.6944	50.0519	27.168	55.5899	50.0519	0.0136983
jgi|Nemve1|244990|estExt_fgenesh1_pg.C_1410035	38.8467	47.7509	31.7757	25.9269	30.2044	26.7999	0.0137002
jgi|Nemve1|135928|e_gw.365.30.1	7.94142	7.83693	7.52345	7.00099	8.88185	4.0752	0.0137046
jgi|Nemve1|171944|estExt_gwp.C_1950059	8.03335	10.6219	12.9872	9.50613	14.7724	14.8171	0.0137155
jgi|Nemve1|241731|estExt_fgenesh1_pg.C_500072	103.303	92.5809	77.4932	47.9597	77.0437	76.3375	0.0137534
jgi|Nemve1|242646|estExt_fgenesh1_pg.C_680066	1.7105	1.7105	2.02726	2.09061	3.1676	2.40737	0.0137892
jgi|Nemve1|161336|estExt_gwp.C_200156	176.592	174.084	168.546	293.728	249.423	180.981	0.0138157
jgi|Nemve1|166819|estExt_gwp.C_790027	66.0893	73.1103	76.3155	76.0612	55.5068	38.1578	0.0138167
jgi|Nemve1|162155|estExt_gwp.C_270336	113.318	132.387	119.61	88.8571	83.0788	68.8257	0.0138217
jgi|Nemve1|18790|gw.519.13.1	7.85564	6.14514	4.56134	6.52525	4.18123	4.8781	0.0138242
jgi|Nemve1|239446|estExt_fgenesh1_pg.C_150025	12.7764	17.0138	7.83278	13.8037	14.1889	11.6208	0.0138327
jgi|Nemve1|236584|estExt_fgenesh1_kg.C_260018	11.1713	12.9048	10.2083	10.4009	18.8757	13.6753	0.0138412
jgi|Nemve1|232428|fgsh_est.C_scaffold_46000007	17.8073	23.4752	26.8225	19.9495	34.2756	20.8867	0.013855
jgi|Nemve1|161920|estExt_gwp.C_260003	104.158	108.099	106.785	142.38	88.5935	66.6586	0.0138558
jgi|Nemve1|103923|e_gw.70.126.1	7.02706	6.83004	5.51657	7.6838	4.40012	4.26878	0.0138611
jgi|Nemve1|135304|e_gw.354.15.1	0.803335	0.669446	0.580186	0.446297	0.490927	0.446297	0.0138643
jgi|Nemve1|235524|estExt_fgenesh1_pm.C_1650001	31.2669	39.6775	23.6909	47.9597	41.8604	32.0374	0.0138691
jgi|Nemve1|238741|estExt_fgenesh1_pg.C_80047	86.423	121.341	117.937	170.402	167.608	143.689	0.0138797
jgi|Nemve1|247576|estExt_fgenesh1_pg.C_3170028	67.8372	127.775	84.2609	74.4424	94.1687	73.5944	0.0138938
jgi|Nemve1|241226|estExt_fgenesh1_pg.C_420034	25.8642	27.3293	15.7214	16.792	28.5126	24.9063	0.0138943
jgi|Nemve1|181975|estExt_GenewiseH_1.C_330050	64.1051	58.6103	57.2367	47.9262	39.735	33.0192	0.0138948
jgi|Nemve1|243828|estExt_fgenesh1_pg.C_990062	8.35939	15.1514	10.0313	8.35939	9.82228	8.77736	0.0139007
jgi|Nemve1|173814|estExt_gwp.C_2700096	35.3323	44.3953	39.7981	50.7656	69.4169	44.5266	0.013942
jgi|Nemve1|166591|estExt_gwp.C_750145	3.86321	3.18147	3.29509	5.79481	5.05626	3.8064	0.013947
jgi|Nemve1|236374|estExt_fgenesh1_kg.C_60006	35.8787	43.9972	32.736	22.2605	43.0369	44.8701	0.0139661
jgi|Nemve1|116591|e_gw.139.109.1	7.73244	5.5381	6.16505	6.58302	7.00099	10.7627	0.0139718
jgi|Nemve1|177965|estExt_GenewiseH_1.C_40689	37.9905	43.6997	40.105	55.3294	41.4442	24.9511	0.0140064
jgi|Nemve1|167869|estExt_gwp.C_940111	25.7067	23.386	24.2786	14.3708	32.3119	24.948	0.0140102
jgi|Nemve1|236947|estExt_fgenesh1_kg.C_770008	29.7126	26.6448	20.3955	14.2598	21.2477	20.5659	0.0140817
jgi|Nemve1|164044|estExt_gwp.C_460094	26.3388	43.636	38.3944	29.8114	52.219	37.1495	0.0141022
jgi|Nemve1|200499|fgenesh1_pg.scaffold_22000021	4.28445	3.7489	4.0613	4.0613	2.58852	2.32074	0.0141056
jgi|Nemve1|229104|fgenesh1_pm.scaffold_53000019	18.1576	20.4273	16.1498	9.60256	19.9908	16.3244	0.0141434
jgi|Nemve1|161841|estExt_gwp.C_250064	16.6793	17.3555	16.792	15.7214	28.907	20.9618	0.0141506
jgi|Nemve1|240935|estExt_fgenesh1_pg.C_370042	16.8854	17.5917	11.364	9.82308	15.8582	11.1071	0.0141513
jgi|Nemve1|117625|e_gw.148.28.1	3.12465	2.44291	1.9316	3.46553	1.87479	2.55654	0.0141519
jgi|Nemve1|239871|estExt_fgenesh1_pg.C_210035	8.73162	10.8503	13.29	7.31915	14.3815	10.5293	0.014169
jgi|Nemve1|20024|gw.74.7.1	333.753	303.736	223.655	197.403	178.68	229.608	0.0141858
jgi|Nemve1|203263|fgenesh1_pg.scaffold_41000102	14.4491	12.1596	12.1087	8.08945	9.9719	7.63155	0.0141922
jgi|Nemve1|93294|e_gw.32.34.1	12.7481	16.5098	8.35939	10.9717	12.9571	9.29982	0.0141941
jgi|Nemve1|167588|estExt_gwp.C_890172	13.3443	16.6023	18.6998	9.28298	15.0402	11.4252	0.0142126
jgi|Nemve1|81870|e_gw.5.116.1	10.3398	7.10149	8.01048	6.07887	7.1583	4.99945	0.014226
jgi|Nemve1|96606|e_gw.43.215.1	5.24033	6.41051	4.98595	6.8684	9.71751	6.61401	0.0142315
jgi|Nemve1|229027|fgenesh1_pm.scaffold_48000013	69.8542	85.0155	67.0559	38.2595	65.8858	58.3051	0.0142315
jgi|Nemve1|115192|e_gw.130.156.1	1.90006	1.31039	1.24487	1.44143	2.29318	1.44143	0.0142325
jgi|Nemve1|176326|estExt_gwp.C_6880021	12.2214	20.0781	18.1576	13.7928	21.0383	12.1341	0.0142432
jgi|Nemve1|129440|e_gw.266.16.1	23.0928	21.212	22.0479	14.3155	19.7491	12.0166	0.0143068
jgi|Nemve1|239644|estExt_fgenesh1_pg.C_170115	18.2449	35.4422	38.6721	31.6011	39.0213	33.6963	0.0143143
jgi|Nemve1|232157|fgsh_est.C_scaffold_25000012	7.6128	10.2261	5.96525	12.2714	10.6806	10.3966	0.0143389
jgi|Nemve1|122684|e_gw.192.89.1	2.21566	2.3861	1.76117	1.19305	2.49972	1.98842	0.014342
jgi|Nemve1|108544|e_gw.91.3.1	16.021	24.5996	17.1004	15.2256	14.0894	12.3282	0.014358
jgi|Nemve1|246601|estExt_fgenesh1_pg.C_2290016	22.765	32.6824	28.6817	37.9229	37.8665	47.4459	0.01436
jgi|Nemve1|212027|fgenesh1_pg.scaffold_148000026	49.1981	52.7086	25.235	45.6367	52.4033	53.4718	0.0143823
jgi|Nemve1|137788|e_gw.411.24.1	0.450792	0.338094	0.281745	0.281745	0.507141	0.338094	0.014393
jgi|Nemve1|205759|fgenesh1_pg.scaffold_62000078	5.26631	5.62334	4.82001	7.58705	7.40853	3.97204	0.0144137
jgi|Nemve1|8255|gw.1560.4.1	7.68205	6.37261	3.92832	4.97587	5.15046	4.4521	0.0144215
jgi|Nemve1|130600|e_gw.282.9.1	51.5046	60.1469	50.1952	76.8205	51.2427	35.6168	0.0144353
jgi|Nemve1|90859|e_gw.25.18.1	41.09	40.9616	28.8914	58.4248	37.8156	32.7436	0.0144415
jgi|Nemve1|160387|estExt_gwp.C_130276	12.6436	12.3301	10.4492	14.4199	19.0176	19.3311	0.0144479
jgi|Nemve1|21386|gw.87.24.1	11.5515	7.32537	7.60712	13.6365	12.4531	10.2555	0.0144892
jgi|Nemve1|248421|estExt_fgenesh1_pg.C_5560004	31.9747	47.1261	36.6768	52.4552	61.8595	57.8888	0.0145085
jgi|Nemve1|85360|e_gw.11.401.1	5.69823	6.66489	6.61401	10.4807	6.15612	5.69823	0.0145175
jgi|Nemve1|142809|e_gw.705.1.1	130.333	103.271	85.4628	96.8986	69.4003	68.5274	0.0145224
jgi|Nemve1|246548|estExt_fgenesh1_pg.C_2240021	6.61292	11.7492	11.1071	14.5741	12.8406	10.1441	0.0145386
jgi|Nemve1|247138|estExt_fgenesh1_pg.C_2710024	27.3202	23.8395	26.8605	15.5646	22.9857	15.1706	0.0145505
jgi|Nemve1|204823|fgenesh1_pg.scaffold_54000020	86.3107	103.761	71.4728	71.1593	70.3234	47.753	0.0145534
jgi|Nemve1|241826|estExt_fgenesh1_pg.C_520042	39.4041	35.8577	39.4041	19.8991	26.1381	32.3114	0.0145668
jgi|Nemve1|203782|fgenesh1_pg.scaffold_45000081	163.74	156.634	167.71	214	288.817	236.989	0.0145676
jgi|Nemve1|210758|fgenesh1_pg.scaffold_127000015	7.00164	8.46031	10.7942	11.3047	6.4911	6.63697	0.0145696
jgi|Nemve1|88939|e_gw.19.56.1	8.66945	8.24655	7.47123	7.1893	9.65621	13.6738	0.0145701
jgi|Nemve1|26323|gw.109.75.1	13.6182	11.5231	11.2612	20.0781	12.6579	10.6501	0.0145752
jgi|Nemve1|212713|fgenesh1_pg.scaffold_161000029	70.3024	77.8142	58.8743	42.3099	42.6309	67.2207	0.0145933
jgi|Nemve1|141205|e_gw.566.2.1	33.808	45.9947	28.1734	50.1224	56.2157	49.7293	0.0146221
jgi|Nemve1|233799|fgsh_est.C_scaffold_588000001	5.17604	5.76571	4.84844	4.25877	8.51753	5.63467	0.0146235
jgi|Nemve1|200670|fgenesh1_pg.scaffold_23000035	33.1725	24.0064	21.9113	34.5692	42.3386	38.3229	0.0146291
jgi|Nemve1|178088|estExt_GenewiseH_1.C_50346	48.2821	59.1493	58.274	31.4344	69.7976	51.7829	0.0146924
jgi|Nemve1|135301|e_gw.354.2.1	34.2816	33.0994	23.9708	18.914	21.5409	21.4752	0.0147078
jgi|Nemve1|208335|fgenesh1_pg.scaffold_91000036	3.67441	3.86447	4.62469	2.02726	3.80111	4.05452	0.0147083
jgi|Nemve1|177548|estExt_GenewiseH_1.C_30409	99.0067	102.721	74.9419	56.0156	89.1874	118.9	0.0147262
jgi|Nemve1|222122|fgenesh1_pg.scaffold_1401000002	1.62112	1.90305	1.40967	2.04402	2.67837	2.60788	0.014732
jgi|Nemve1|82762|e_gw.6.72.1	5.83123	8.38649	12.5797	9.95896	11.2038	10.7452	0.0147512
jgi|Nemve1|119814|e_gw.164.15.1	17.718	20.6636	13.5228	21.0652	10.9789	14.2815	0.0147624
jgi|Nemve1|100694|e_gw.58.64.1	6.65195	9.81955	6.84201	8.86927	8.55251	4.68804	0.0147677
jgi|Nemve1|197216|fgenesh1_pg.scaffold_5000022	82.3726	83.9777	87.8941	66.8354	125.132	125.003	0.0147779
jgi|Nemve1|130466|e_gw.280.8.1	14.3166	13.4644	8.80585	7.95367	12.8963	14.9983	0.0147824
jgi|Nemve1|211859|fgenesh1_pg.scaffold_145000021	8.73993	6.06156	5.0748	6.48446	9.51525	9.23331	0.0147923
jgi|Nemve1|206034|fgenesh1_pg.scaffold_65000069	3.61106	4.24458	2.59743	3.61106	2.47072	2.28067	0.0148048
jgi|Nemve1|223674|fgenesh1_pg.scaffold_3158000001	7.49779	6.96223	7.45316	3.70427	5.13242	6.02501	0.014823
jgi|Nemve1|205821|fgenesh1_pg.scaffold_63000034	12.7452	11.6977	8.90419	10.6501	8.20582	6.19802	0.0148433
jgi|Nemve1|229539|fgenesh1_pm.scaffold_84000002	47.2306	30.8253	23.5108	28.4219	30.3028	27.2725	0.0148472
jgi|Nemve1|245399|estExt_fgenesh1_pg.C_1580010	154.765	219.02	143.461	121.289	150.827	227.626	0.0148529
jgi|Nemve1|164054|estExt_gwp.C_460179	12.7122	16.757	15.473	10.5293	13.5469	8.08959	0.0148542
jgi|Nemve1|98950|e_gw.51.142.1	8.14033	10.8368	7.17366	7.5298	13.1772	7.88594	0.0148688
jgi|Nemve1|172894|estExt_gwp.C_2290017	23.9478	17.3348	18.8757	12.5838	26.7085	20.9302	0.0148728
jgi|Nemve1|133899|e_gw.323.28.1	0.170436	0.227248	0.113624	0.227248	0.227248	0.170436	0.0149028
jgi|Nemve1|200090|fgenesh1_pg.scaffold_19000082	72.7921	96.1826	64.2746	63.0953	64.7332	43.3739	0.0149106
jgi|Nemve1|170210|estExt_gwp.C_1420088	16.4101	15.0243	14.8785	24.3599	25.8915	16.9936	0.0149447
jgi|Nemve1|10744|gw.111.10.1	62.382	82.131	49.6339	68.965	52.2462	40.1251	0.0149459
jgi|Nemve1|143435|e_gw.808.5.1	1.11574	1.60667	1.07111	1.16037	1.56204	0.803335	0.0149625
jgi|Nemve1|80996|e_gw.3.603.1	6.80553	14.3815	9.05264	10.2725	12.7764	10.7219	0.014978
jgi|Nemve1|237991|estExt_fgenesh1_pg.C_20285	10.5373	12.7349	17.5809	10.1992	8.8468	14.0309	0.0149805
jgi|Nemve1|119021|e_gw.158.21.1	4.00078	4.11348	2.9865	4.50792	6.42379	5.01506	0.0149805
jgi|Nemve1|110119|e_gw.98.154.1	2.64561	5.5456	3.86665	4.83332	4.07016	3.40876	0.0149844
jgi|Nemve1|199928|fgenesh1_pg.scaffold_18000052	11.4698	10.6219	7.89946	17.1824	12.6302	11.2913	0.0149904
jgi|Nemve1|241591|estExt_fgenesh1_pg.C_470123	23.8769	22.895	24.4571	12.3178	22.5826	16.0667	0.014999
jgi|Nemve1|10011|gw.156.1.1	122.371	128.535	73.8336	146.833	112.227	83.464	0.0150007
jgi|Nemve1|229404|fgenesh1_pm.scaffold_74000015	13.578	21.2477	18.1798	29.2013	23.6906	24.6564	0.0150155
jgi|Nemve1|222213|fgenesh1_pg.scaffold_1459000003	8.99727	5.84494	4.92551	6.56735	6.83004	4.4658	0.0150178
jgi|Nemve1|214431|fgenesh1_pg.scaffold_200000013	123.123	109.035	116.586	92.6941	85.9886	57.9268	0.0150264
jgi|Nemve1|90789|e_gw.25.236.1	2.34034	1.9842	1.67894	1.7807	2.54385	3.25613	0.0150343
jgi|Nemve1|167837|estExt_gwp.C_930145	65.6505	69.5162	54.2501	107.059	76.1991	58.4434	0.0150462
jgi|Nemve1|170236|estExt_gwp.C_1430009	19.1972	22.7353	22.1456	11.6625	24.0456	15.8557	0.0150596
jgi|Nemve1|186779|estExt_GenewiseH_1.C_890109	86.2062	112.434	96.133	53.3956	101.253	71.1593	0.0150635
jgi|Nemve1|245481|estExt_fgenesh1_pg.C_1620025	136.897	161.256	125.3	202.245	167.018	94.668	0.0150659
jgi|Nemve1|188586|estExt_GenewiseH_1.C_1260005	22.2015	25.9769	21.8634	16.5666	13.8619	14.538	0.015072
jgi|Nemve1|165971|estExt_gwp.C_670074	12.648	23.9478	23.1773	16.6928	26.0023	23.3057	0.0150739
jgi|Nemve1|36078|gw.6.177.1	8.2565	12.2732	13.4335	14.9956	17.6287	16.9147	0.015092
jgi|Nemve1|213347|fgenesh1_pg.scaffold_174000032	44.475	51.6643	65.2675	90.0777	62.9416	53.2854	0.0150929
jgi|Nemve1|241820|estExt_fgenesh1_pg.C_520030	30.4488	32.7747	30.3078	19.3829	25.9379	16.9865	0.0151162
jgi|Nemve1|107874|e_gw.88.252.1	4.22279	4.07016	2.74736	2.03508	3.25613	3.45964	0.0151268
jgi|Nemve1|236403|estExt_fgenesh1_kg.C_80003	116.18	91.9785	85.7292	80.6161	79.0254	50.9035	0.0151624
jgi|Nemve1|211151|fgenesh1_pg.scaffold_133000023	20.3955	18.5775	13.578	15.0552	10.283	12.2146	0.0151638
jgi|Nemve1|81576|e_gw.4.312.1	32.5632	32.039	25.8802	21.6214	21.949	16.3799	0.0151936
jgi|Nemve1|219436|fgenesh1_pg.scaffold_410000015	6.05437	7.93682	5.90174	10.2263	10.6333	7.02103	0.015194
jgi|Nemve1|246110|estExt_fgenesh1_pg.C_1970019	118.405	92.3037	89.0094	75.8322	68.23	57.0801	0.0151954
jgi|Nemve1|139771|e_gw.486.4.1	51.0564	55.5194	28.7415	46.7273	39.7204	31.821	0.0151968
jgi|Nemve1|234273|estExt_fgenesh1_pm.C_170020	99.4519	82.6064	84.439	146.394	98.1128	73.6551	0.0152101
jgi|Nemve1|239559|estExt_fgenesh1_pg.C_160105	59.1073	53.0889	52.9622	96.3583	85.0816	68.4834	0.0152395
jgi|Nemve1|162805|estExt_gwp.C_330257	77.9436	77.3331	49.8595	68.9384	106.028	97.4295	0.0152469
jgi|Nemve1|93026|e_gw.32.250.1	22.1524	37.6173	25.4961	35.7364	32.4971	45.3497	0.015249
jgi|Nemve1|90783|e_gw.25.7.1	411.489	417.227	278.492	590.617	379.106	339.167	0.0152762
jgi|Nemve1|119247|e_gw.160.105.1	19.9049	16.2452	20.8421	21.8239	12.8087	11.5591	0.0152799
jgi|Nemve1|103742|e_gw.69.191.1	9.11684	13.29	17.2064	15.473	10.2083	10.3367	0.015285
jgi|Nemve1|162513|estExt_gwp.C_310188	77.3527	99.4625	86.0319	84.5748	55.623	50.1114	0.015315
jgi|Nemve1|177781|estExt_GenewiseH_1.C_40190	165.198	169.522	132.179	83.2857	140.166	106.944	0.0153204
jgi|Nemve1|90458|e_gw.24.201.1	29.4705	34.2039	20.1166	21.0182	39.0499	30.0904	0.0153239
jgi|Nemve1|218196|fgenesh1_pg.scaffold_334000023	6.19937	8.82498	8.82498	12.6905	9.11672	6.78284	0.0153275
jgi|Nemve1|201621|fgenesh1_pg.scaffold_29000103	28.0275	19.9495	19.771	12.2285	23.3413	22.4487	0.0153538
jgi|Nemve1|20757|gw.112.20.1	20.7764	24.9667	17.8957	11.6977	15.8879	15.7133	0.0153563
jgi|Nemve1|222094|fgenesh1_pg.scaffold_1386000002	30.5771	28.0841	33.0701	18.6719	20.5034	18.7227	0.0153587
jgi|Nemve1|191874|estExt_GenewiseH_1.C_2190084	48.5376	108.439	101.505	82.2442	97.0109	86.0322	0.0153679
jgi|Nemve1|208835|fgenesh1_pg.scaffold_97000068	5.11052	3.73461	2.48974	5.24156	3.66909	3.99669	0.0153941
jgi|Nemve1|161307|estExt_gwp.C_200075	18.0553	13.684	11.53	16.028	12.417	8.4258	0.0154075
jgi|Nemve1|197073|fgenesh1_pg.scaffold_4000153	76.2966	65.3649	59.2792	43.6141	45.6991	40.0078	0.0154143
jgi|Nemve1|245041|estExt_fgenesh1_pg.C_1430004	41.9966	78.2805	86.3585	70.5596	63.8205	51.5473	0.0154155
jgi|Nemve1|170313|estExt_gwp.C_1450010	55.2584	60.6707	62.7658	60.1469	94.6289	97.1604	0.0154256
jgi|Nemve1|167466|estExt_gwp.C_880226	100.527	94.8354	104.189	65.1395	142.845	85.0307	0.0154365
jgi|Nemve1|38262|gw.10.199.1	1.26704	1.20369	1.64715	1.7105	1.14033	0.823575	0.0154994
jgi|Nemve1|177328|estExt_GenewiseH_1.C_20494	17.6936	34.711	23.9483	18.5952	29.1888	26.9348	0.0155025
jgi|Nemve1|115608|e_gw.133.158.1	33.808	43.898	25.094	36.8219	25.356	23.1939	0.0155045
jgi|Nemve1|243391|estExt_fgenesh1_pg.C_870058	238.318	193.186	171.013	101.351	187.512	182.536	0.0155167
jgi|Nemve1|30047|gw.13.4.1	48.467	57.333	34.4786	70.4677	52.6045	38.6817	0.0155319
jgi|Nemve1|222341|fgenesh1_pg.scaffold_1550000001	4.1797	4.1797	6.37404	7.00099	7.31447	7.52345	0.0155345
jgi|Nemve1|203118|fgenesh1_pg.scaffold_40000086	37.9738	39.2832	18.5068	27.3236	32.0376	27.7601	0.0155363
jgi|Nemve1|179634|estExt_GenewiseH_1.C_130277	27.2701	36.1736	17.3491	19.842	25.6929	24.2175	0.0155613
jgi|Nemve1|233863|estExt_fgenesh1_pm.C_10011	21.9789	26.3034	19.6385	36.3771	31.5946	19.9438	0.0155832
jgi|Nemve1|54443|gw.130.169.1	2.36425	2.56127	2.16723	3.15233	1.77318	1.51049	0.0155835
jgi|Nemve1|191787|estExt_GenewiseH_1.C_2170113	34.6099	52.5388	48.0073	63.5063	73.9484	46.7595	0.0155991
jgi|Nemve1|237547|estExt_fgenesh1_kg.C_3270001	745.674	892.928	1038.07	1329.87	826.047	653.486	0.0155992
jgi|Nemve1|199929|fgenesh1_pg.scaffold_18000053	8.40816	13.294	6.13569	9.60121	9.65802	7.84004	0.0156316
jgi|Nemve1|220391|fgenesh1_pg.scaffold_517000001	46.9171	60.3966	66.0392	78.3693	97.9094	87.6691	0.0156379
jgi|Nemve1|137650|e_gw.408.57.1	14.7711	13.9757	10.3966	8.29454	17.7821	13.7485	0.0156389
jgi|Nemve1|189883|estExt_GenewiseH_1.C_1530097	216.775	197.616	160.369	152.649	123.855	109.035	0.0156449
jgi|Nemve1|239220|estExt_fgenesh1_pg.C_130025	99.3628	212.412	185.803	158.787	199.998	141.947	0.0156487
jgi|Nemve1|241184|estExt_fgenesh1_pg.C_410048	92.0549	105.748	69.3851	78.5578	118.656	140.015	0.0156613
jgi|Nemve1|186733|estExt_GenewiseH_1.C_890022	151.94	132.284	127.108	79.2786	183.979	141.522	0.0156658
jgi|Nemve1|237330|estExt_fgenesh1_kg.C_1800002	32.61	37.0414	44.8246	50.2217	67.8902	49.8809	0.0156684
jgi|Nemve1|246114|estExt_fgenesh1_pg.C_1970028	14.3815	13.6111	15.6656	7.51176	17.5274	14.6383	0.0156736
jgi|Nemve1|112267|e_gw.110.96.1	15.308	17.0039	12.1839	13.746	11.0235	7.8102	0.0156827
jgi|Nemve1|20017|gw.167.28.1	50.6194	51.8125	38.064	23.6338	39.2002	40.3365	0.0156957
jgi|Nemve1|88316|e_gw.18.101.1	2.88077	3.92832	3.75373	5.41235	3.31725	2.70618	0.0156972
jgi|Nemve1|169387|estExt_gwp.C_1260070	1.66928	2.95334	1.9903	1.79769	1.9903	1.41247	0.0156982
jgi|Nemve1|164242|estExt_gwp.C_470251	24.7008	30.9252	22.6697	43.4394	40.8186	36.953	0.0156996
jgi|Nemve1|239915|estExt_fgenesh1_pg.C_210151	42.7129	42.8539	39.3297	22.6251	30.5898	26.3608	0.0157225
jgi|Nemve1|166662|estExt_gwp.C_770002	37.8844	42.3191	39.3415	30.0288	62.465	52.7088	0.01574
jgi|Nemve1|93174|e_gw.32.96.1	2.99019	3.12408	2.49926	4.86464	4.64149	3.61501	0.0157634
jgi|Nemve1|102575|e_gw.65.82.1	29.2247	37.4339	24.5619	17.7318	30.7352	36.6458	0.0157987
jgi|Nemve1|128230|e_gw.247.4.1	2.8738	4.05713	3.21189	4.33887	5.6349	5.29681	0.0158009
jgi|Nemve1|145251|e_gw.1384.5.1	4.10291	7.33286	6.4599	8.20582	6.28531	4.53939	0.015802
jgi|Nemve1|116645|e_gw.139.126.1	2.08596	2.39122	1.67894	1.17017	1.57719	2.34034	0.0158354
jgi|Nemve1|228516|fgenesh1_pm.scaffold_22000001	1.14942	2.19434	1.88086	1.14942	1.46289	1.67188	0.015857
jgi|Nemve1|216464|fgenesh1_pg.scaffold_261000030	18.0703	26.3634	25.1412	39.8943	25.5777	24.7921	0.0158633
jgi|Nemve1|245289|estExt_fgenesh1_pg.C_1530050	45.9245	55.4474	51.7847	25.9769	35.1054	46.657	0.01589
jgi|Nemve1|237239|estExt_fgenesh1_kg.C_1450005	432.907	350.132	367.857	413.136	264.175	582.208	0.0158942
jgi|Nemve1|210933|fgenesh1_pg.scaffold_129000059	3.61204	3.4807	3.28367	2.42992	2.03588	4.26878	0.0158949
jgi|Nemve1|239575|estExt_fgenesh1_pg.C_160135	28.8399	28.8399	34.587	24.2422	19.3311	16.9278	0.015919
jgi|Nemve1|128867|e_gw.257.43.1	14.9514	11.1589	14.7326	18.4522	14.4409	8.31444	0.0159218
jgi|Nemve1|208403|fgenesh1_pg.scaffold_92000019	5.07141	6.76188	3.38094	5.91665	3.71904	4.67697	0.0159229
jgi|Nemve1|182716|estExt_GenewiseH_1.C_400177	13.6936	15.5281	15.8557	19.2627	12.3177	8.51753	0.0159431
jgi|Nemve1|175455|estExt_gwp.C_3950005	153.292	177.997	171.973	143.951	263.459	254.031	0.0159601
jgi|Nemve1|239752|estExt_fgenesh1_pg.C_190079	102.976	155.318	124.78	75.7872	86.9517	98.7073	0.0159726
jgi|Nemve1|248658|estExt_fgenesh1_pg.C_9570002	6.14204	4.05713	3.60634	5.91665	7.43807	5.7476	0.016011
jgi|Nemve1|237922|estExt_fgenesh1_pg.C_20165	8.10904	10.8965	5.51162	6.7153	6.01843	6.39854	0.0160175
jgi|Nemve1|197093|fgenesh1_pg.scaffold_4000173	19.5543	14.753	13.0071	8.6423	17.3719	15.8006	0.0160225
jgi|Nemve1|172228|estExt_gwp.C_2060050	35.3826	42.2195	30.3078	25.6559	52.2281	46.66	0.0160383
jgi|Nemve1|228490|fgenesh1_pm.scaffold_20000021	11.4888	10.7839	8.73993	9.37428	5.9206	6.3435	0.016052
jgi|Nemve1|99499|e_gw.53.202.1	19.1967	19.9672	12.7122	11.9418	18.6189	11.1071	0.016076
jgi|Nemve1|113343|e_gw.117.105.1	114.414	70.0039	58.0937	67.6598	101.49	93.254	0.0160962
jgi|Nemve1|216282|fgenesh1_pg.scaffold_255000026	131.466	102.924	66.598	87.1524	69.7015	81.2506	0.016102
jgi|Nemve1|175574|estExt_gwp.C_4180019	16.7748	30.4134	29.0276	24.8704	23.9223	15.8266	0.0161051
jgi|Nemve1|244838|estExt_fgenesh1_pg.C_1360004	26.8545	20.4805	12.8526	17.6592	26.7501	23.0928	0.0161175
jgi|Nemve1|224152|fgenesh1_pg.scaffold_4042000001	1.76117	2.04523	1.47711	2.95422	1.59073	1.81798	0.0161563
jgi|Nemve1|209236|fgenesh1_pg.scaffold_103000011	3.55274	7.00099	6.58302	4.38868	4.80665	4.38868	0.0161638
jgi|Nemve1|164893|estExt_gwp.C_540142	150.556	117.684	118.005	109.466	82.6936	70.8802	0.0161918
jgi|Nemve1|84777|e_gw.10.112.1	2.05297	3.3026	3.34723	2.00834	2.90093	1.87445	0.0161995
jgi|Nemve1|118447|e_gw.153.69.1	57.9094	56.8154	54.9191	46.6046	32.8202	31.2886	0.0162084
jgi|Nemve1|134218|e_gw.332.5.1	14.2376	19.8058	15.4358	10.8544	13.1099	9.37428	0.0162281
jgi|Nemve1|136284|e_gw.372.7.1	7.99338	4.7174	7.14162	10.6142	9.4348	7.27266	0.0162588
jgi|Nemve1|210265|fgenesh1_pg.scaffold_119000027	27.7142	40.5862	29.8814	25.2843	23.4454	18.6513	0.016266
jgi|Nemve1|159908|estExt_gwp.C_110066	11.9161	11.6037	8.74742	18.6552	12.4071	10.488	0.0162815
jgi|Nemve1|20356|gw.37.14.1	97.4395	111.443	74.2465	85.5513	64.9839	53.2416	0.0162899
jgi|Nemve1|93314|e_gw.32.136.1	12.3466	15.5646	11.8212	12.675	7.94649	7.88082	0.0162932
jgi|Nemve1|235892|estExt_fgenesh1_pm.C_2700006	6.25474	6.53649	7.15633	8.56505	12.1714	7.15633	0.0162932
jgi|Nemve1|110014|e_gw.98.29.1	17.2971	15.7902	17.0351	13.497	21.6214	27.7803	0.0163015
jgi|Nemve1|245829|estExt_fgenesh1_pg.C_1790010	244.154	248.101	150.834	154.288	264.735	160.35	0.0163055
jgi|Nemve1|214162|fgenesh1_pg.scaffold_193000027	20.18	17.8868	17.6247	10.1555	15.004	11.1383	0.0163387
jgi|Nemve1|177276|estExt_GenewiseH_1.C_20405	53.9145	40.5069	37.6663	61.6409	75.6166	64.4247	0.0163427
jgi|Nemve1|183725|estExt_GenewiseH_1.C_510007	22.0479	27.8995	23.5108	45.0362	30.6163	31.2432	0.0163633
jgi|Nemve1|243717|estExt_fgenesh1_pg.C_960053	93.6252	89.9679	150.887	158.41	149.842	172.203	0.0163933
jgi|Nemve1|128006|e_gw.245.22.1	14.907	17.6543	9.56488	8.90348	15.721	13.228	0.0164156
jgi|Nemve1|202525|fgenesh1_pg.scaffold_36000002	11.2852	12.4346	11.3897	5.74708	12.8526	9.19533	0.0164417
jgi|Nemve1|22904|gw.77.55.1	7.60712	9.74838	7.71982	4.28253	5.973	7.94521	0.0164563
jgi|Nemve1|181577|estExt_GenewiseH_1.C_300161	153.574	134.441	117.941	115.437	86.3532	73.0631	0.0164647
jgi|Nemve1|114642|e_gw.127.105.1	8.46497	16.8731	11.6464	9.37396	9.20353	10.9079	0.0164784
jgi|Nemve1|223755|fgenesh1_pg.scaffold_3282000001	1.20369	1.7105	1.45709	0.760223	1.39374	1.07698	0.0164962
jgi|Nemve1|166645|estExt_gwp.C_760195	79.114	89.8767	92.187	76.8037	56.18	44.6848	0.0165032
jgi|Nemve1|190171|estExt_GenewiseH_1.C_1630021	42.2937	30.0785	26.9261	19.308	38.8787	31.5233	0.0165217
jgi|Nemve1|219056|fgenesh1_pg.scaffold_383000005	2.81167	4.15056	3.70427	5.17705	3.16871	2.54389	0.0165301
jgi|Nemve1|247895|estExt_fgenesh1_pg.C_3730017	5.4002	6.29279	4.90927	9.41687	8.12261	5.4002	0.0165343
jgi|Nemve1|22099|gw.74.39.1	49.4521	32.5741	23.3141	27.9112	32.377	39.8638	0.0165359
jgi|Nemve1|114326|e_gw.124.173.1	1.73348	2.37552	2.37552	1.60508	3.33856	2.18291	0.016546
jgi|Nemve1|128450|e_gw.250.34.1	4.74069	7.07457	5.47003	5.10536	9.48138	6.19937	0.0165607
jgi|Nemve1|42067|gw.218.74.1	7.73097	12.4717	7.1475	6.12643	7.00164	7.65804	0.0165663
jgi|Nemve1|100066|e_gw.55.95.1	21.8801	16.0454	15.2431	31.1427	19.5462	22.3907	0.016594
jgi|Nemve1|112635|e_gw.113.98.1	1.89628	1.96921	2.55268	1.31281	1.38574	2.40681	0.0165987
jgi|Nemve1|5958|gw.777.3.1	0.349184	0.611072	0.349184	0.611072	0.611072	0.611072	0.016627
jgi|Nemve1|245344|estExt_fgenesh1_pg.C_1560027	26.4312	53.4263	36.1579	50.607	57.162	45.6732	0.0166379
jgi|Nemve1|242046|estExt_fgenesh1_pg.C_550116	105.642	118.076	96.133	175.652	115.151	83.1759	0.0166415
jgi|Nemve1|243034|estExt_fgenesh1_pg.C_770072	18.8115	13.7395	12.3912	15.4087	25.4886	19.3893	0.0166545
jgi|Nemve1|30774|gw.34.30.1	22.8947	25.1841	20.1982	20.2999	13.4315	12.7701	0.0166795
jgi|Nemve1|210132|fgenesh1_pg.scaffold_117000024	0.957933	1.01428	1.07063	1.57777	1.35238	0.732537	0.0166903
jgi|Nemve1|138962|e_gw.451.16.1	25.7051	21.9434	19.3311	17.6592	16.3008	11.2852	0.0166904
jgi|Nemve1|161954|estExt_gwp.C_260066	18.1798	23.5769	23.9746	22.0998	37.2686	32.4964	0.0166979
jgi|Nemve1|169450|estExt_gwp.C_1270076	19.111	19.702	11.9526	15.4989	10.3764	11.9526	0.0166998
jgi|Nemve1|245929|estExt_fgenesh1_pg.C_1850035	52.4552	65.6212	80.4591	42.2149	90.3859	68.2335	0.0167057
jgi|Nemve1|175435|estExt_gwp.C_3900053	4.36581	4.68683	3.08175	2.1187	3.46697	4.0448	0.0167063
jgi|Nemve1|89885|e_gw.22.169.1	11.9161	10.5326	10.4434	11.4698	9.72928	5.08779	0.0167097
jgi|Nemve1|186808|estExt_GenewiseH_1.C_890166	47.4163	37.3025	27.9769	22.7887	28.8307	28.3053	0.0167152
jgi|Nemve1|244775|estExt_fgenesh1_pg.C_1330034	21.1469	29.4217	31.6546	27.9112	44.3296	41.637	0.0167167
jgi|Nemve1|93634|e_gw.33.197.1	6.08569	9.52298	8.28331	11.0444	7.71982	13.073	0.0167191
jgi|Nemve1|242364|estExt_fgenesh1_pg.C_620026	8.0351	7.54171	7.25978	11.2773	6.27301	5.14528	0.016723
jgi|Nemve1|239058|estExt_fgenesh1_pg.C_110116	67.7345	69.567	65.62	39.1182	52.0167	37.3562	0.0167399
jgi|Nemve1|215961|fgenesh1_pg.scaffold_244000013	2.28067	1.77385	1.83721	1.83721	3.10424	3.10424	0.0167407
jgi|Nemve1|247187|estExt_fgenesh1_pg.C_2750020	30.0358	25.2158	28.0275	22.2256	17.6734	14.4154	0.0167546
jgi|Nemve1|193264|estExt_GenewiseH_1.C_2850011	36.5958	61.0572	46.6115	31.8447	53.6096	33.4498	0.0167583
jgi|Nemve1|236349|estExt_fgenesh1_kg.C_50005	39.7824	37.7538	29.1324	26.8221	54.8839	46.3189	0.0167622
jgi|Nemve1|91203|e_gw.26.196.1	19.1715	27.3475	17.1274	14.3786	28.4753	19.3124	0.016763
jgi|Nemve1|244991|estExt_fgenesh1_pg.C_1410036	142.737	188.504	162.695	224.032	145.349	99.0588	0.0167634
jgi|Nemve1|242212|estExt_fgenesh1_pg.C_590007	163.331	176.076	107.112	89.4784	180.004	153.292	0.0167931
jgi|Nemve1|139214|e_gw.466.5.1	12.417	14.761	7.22212	7.91899	11.6568	9.94625	0.0167969
jgi|Nemve1|195059|estExt_GenewiseH_1.C_4790007	29.684	48.5739	40.9158	37.415	40.5512	21.5154	0.0168085
jgi|Nemve1|244411|estExt_fgenesh1_pg.C_1200055	138.034	110.344	112.538	96.9689	74.7121	65.6212	0.0168087
jgi|Nemve1|94190|e_gw.35.92.1	74.3986	66.9796	51.3058	31.7657	60.3966	56.9483	0.0168227
jgi|Nemve1|216634|fgenesh1_pg.scaffold_266000032	21.6214	20.049	14.6108	17.4282	12.0556	10.9418	0.0168306
jgi|Nemve1|248668|estExt_fgenesh1_pg.C_10630003	109.195	108.254	116.3	102.507	81.1906	51.9327	0.0168314
jgi|Nemve1|240106|estExt_fgenesh1_pg.C_240129	33.751	30.6163	17.5547	21.8389	31.8702	20.0625	0.0168445
jgi|Nemve1|238150|estExt_fgenesh1_pg.C_40024	25.7456	31.1427	18.8898	41.0617	38.8007	30.4863	0.0168479
jgi|Nemve1|113892|e_gw.121.84.1	9.06294	6.89572	4.59714	5.51657	6.04196	4.59714	0.0168585
jgi|Nemve1|123513|e_gw.200.72.1	47.0525	47.5763	36.577	32.3868	21.824	34.8311	0.0168695
jgi|Nemve1|171700|estExt_gwp.C_1860010	27.9382	33.6062	23.9662	18.9676	17.6287	18.1643	0.0168786
jgi|Nemve1|237274|estExt_fgenesh1_kg.C_1570005	34.6435	23.0471	25.3809	32.8931	47.7716	39.8218	0.0168906
jgi|Nemve1|239675|estExt_fgenesh1_pg.C_180036	7.79682	8.51753	8.45201	4.7174	11.0073	10.221	0.0169017
jgi|Nemve1|204009|fgenesh1_pg.scaffold_47000068	3.50082	5.90763	7.00164	5.8347	8.38738	6.7099	0.0169373
jgi|Nemve1|165533|estExt_gwp.C_610308	20.9636	32.4964	36.0756	48.9719	38.973	30.9057	0.0169739
jgi|Nemve1|238047|estExt_fgenesh1_pg.C_30078	26.1493	34.7483	30.5898	15.1539	34.4663	29.0391	0.0169794
jgi|Nemve1|237292|estExt_fgenesh1_kg.C_1660001	14.0547	13.9674	10.3009	6.80909	12.396	8.8169	0.0170134
jgi|Nemve1|96234|e_gw.42.57.1	60.9326	58.8375	42.9496	64.7736	39.5451	32.2995	0.0170345
jgi|Nemve1|240131|estExt_fgenesh1_pg.C_250039	5.89173	6.65195	11.5934	9.62949	7.41217	6.52525	0.0170388
jgi|Nemve1|171009|estExt_gwp.C_1650041	36.7332	27.2192	22.9964	22.8947	21.1648	16.7385	0.017042
jgi|Nemve1|246137|estExt_fgenesh1_pg.C_1990014	42.7689	58.5466	36.4578	79.0577	61.9839	54.2641	0.0170605
jgi|Nemve1|239450|estExt_fgenesh1_pg.C_150029	40.8098	50.0431	53.5673	67.0296	88.3156	58.0078	0.0170706
jgi|Nemve1|241376|estExt_fgenesh1_pg.C_440089	33.528	53.1156	42.8385	34.2911	30.0683	24.9297	0.0170764
jgi|Nemve1|50061|gw.47.177.1	29.9157	45.3823	32.1034	24.828	34.1894	20.6561	0.0170842
jgi|Nemve1|85991|e_gw.12.188.1	7.28547	4.8781	3.92782	4.81475	7.98234	6.46189	0.0170899
jgi|Nemve1|210240|fgenesh1_pg.scaffold_119000002	8.90419	12.1341	14.4038	17.4592	19.8162	16.6735	0.0170954
jgi|Nemve1|158326|estExt_gwp.C_30462	19.6894	27.1175	21.6736	14.1438	14.3473	15.1105	0.0171198
jgi|Nemve1|170128|estExt_gwp.C_1410003	17.6662	11.9526	8.9316	17.2721	18.0602	12.2153	0.0171259
jgi|Nemve1|244995|estExt_fgenesh1_pg.C_1410042	18.1259	25.0216	16.2214	13.5944	28.1739	22.5917	0.0171279
jgi|Nemve1|170417|estExt_gwp.C_1470068	107.628	105.725	100.58	74.2894	67.664	53.8492	0.0171286
jgi|Nemve1|94819|e_gw.37.78.1	24.3167	20.5106	11.9822	22.1318	13.6033	21.6384	0.0171405
jgi|Nemve1|143837|e_gw.884.5.1	7.49779	8.03335	7.3639	11.5591	7.00686	4.99853	0.017145
jgi|Nemve1|164114|estExt_gwp.C_460331	59.3226	92.3418	93.9699	59.3226	54.8963	52.7595	0.0171463
jgi|Nemve1|243059|estExt_fgenesh1_pg.C_780046	0.281933	0.281933	0.281933	0.352417	0.140967	0.281933	0.0171872
jgi|Nemve1|214369|fgenesh1_pg.scaffold_198000020	8.90419	14.142	13.3563	6.6345	9.34067	11.0866	0.0171921
jgi|Nemve1|246709|estExt_fgenesh1_pg.C_2350017	103.717	77.313	64.1436	46.7809	66.1091	60.1469	0.0171932
jgi|Nemve1|126045|e_gw.227.7.1	34.2059	31.7262	21.7342	27.4231	45.8753	43.1038	0.0172036
jgi|Nemve1|236556|estExt_fgenesh1_kg.C_250003	40.7832	40.5862	47.0879	51.0283	31.5233	22.9201	0.0172049
jgi|Nemve1|190464|estExt_GenewiseH_1.C_1720026	15.2142	24.7936	17.9753	31.4991	21.638	17.6372	0.0172147
jgi|Nemve1|243793|estExt_fgenesh1_pg.C_980081	115.17	104.245	84.1571	122.218	95.082	53.0034	0.0172243
jgi|Nemve1|237358|estExt_fgenesh1_kg.C_1950001	28.0568	35.5685	45.7768	63.6253	43.4655	43.9149	0.0172296
jgi|Nemve1|108851|e_gw.92.1.1	7.88886	11.8333	6.14204	6.36744	6.42379	9.29759	0.0172303
jgi|Nemve1|36389|gw.8.154.1	10.3107	8.9316	7.02706	12.478	15.1049	13.4631	0.0172326
jgi|Nemve1|94572|e_gw.36.135.1	15.1022	20.8637	17.2846	13.0944	12.0468	9.60256	0.0172331
jgi|Nemve1|218366|fgenesh1_pg.scaffold_344000004	51.2253	43.2788	32.8367	36.0547	22.2633	43.7385	0.0172367
jgi|Nemve1|161314|estExt_gwp.C_200094	23.1284	19.8524	12.8418	15.3971	21.2938	11.7935	0.0172417
jgi|Nemve1|40410|gw.21.173.1	13.3673	15.0778	12.8604	14.3809	22.87	22.9334	0.017271
jgi|Nemve1|171280|estExt_gwp.C_1720089	43.0463	79.8027	47.6327	74.4301	62.0469	44.0291	0.0172776
jgi|Nemve1|93273|e_gw.32.101.1	7.42016	5.58694	3.40454	6.4599	8.03123	6.5472	0.0172891
jgi|Nemve1|103700|e_gw.69.161.1	9.92102	9.41225	9.46313	7.78419	16.3315	12.4649	0.0172897
jgi|Nemve1|189992|estExt_GenewiseH_1.C_1570033	90.0893	62.6366	44.6188	53.2018	74.6922	49.0741	0.0172953
jgi|Nemve1|238876|estExt_fgenesh1_pg.C_90093	18.2979	24.0762	20.0314	16.5644	13.4827	10.9787	0.0173466
jgi|Nemve1|248330|estExt_fgenesh1_pg.C_5080003	19.7353	18.1847	17.1979	24.1053	34.7483	21.7793	0.0173509
jgi|Nemve1|83628|e_gw.8.73.1	9.9167	9.98237	7.02706	13.3317	15.893	11.3615	0.0173855
jgi|Nemve1|10499|gw.286.6.1	32.1404	20.0877	17.1274	22.5547	17.6208	16.0702	0.0173879
jgi|Nemve1|218275|fgenesh1_pg.scaffold_339000016	56.3059	54.8219	46.6161	53.2506	33.0852	28.022	0.0174212
jgi|Nemve1|173328|estExt_gwp.C_2450081	33.584	29.8086	19.8912	15.6087	28.0055	30.4285	0.0174309
jgi|Nemve1|168415|estExt_gwp.C_1040009	23.4543	22.2333	20.707	38.5139	37.6999	31.3403	0.0174599
jgi|Nemve1|236786|estExt_fgenesh1_kg.C_520005	39.1806	28.0423	25.4216	17.3627	22.0145	25.225	0.0174883
jgi|Nemve1|236455|estExt_fgenesh1_kg.C_120012	1416.5	1451.4	1007.62	681.499	1157.46	1491.73	0.0175042
jgi|Nemve1|56931|gw.84.158.1	8.86927	6.33519	6.08178	5.32156	4.43463	4.37128	0.0175091
jgi|Nemve1|95603|e_gw.40.124.1	4.99945	4.03365	4.09046	8.06729	6.47656	5.96525	0.0175177
jgi|Nemve1|222858|fgenesh1_pg.scaffold_2007000001	7.20997	4.0752	5.64259	8.04591	9.19533	8.04591	0.0175284
jgi|Nemve1|218246|fgenesh1_pg.scaffold_338000008	13.4824	16.0771	10.5315	12.3122	19.6894	21.4701	0.0175615
jgi|Nemve1|162262|estExt_gwp.C_280251	19.3223	16.8516	13.494	14.8243	24.8339	11.7201	0.0175758
jgi|Nemve1|99498|e_gw.53.210.1	5.43812	9.50032	4.78292	6.81403	8.91065	5.96227	0.0175854
jgi|Nemve1|110962|e_gw.103.58.1	27.3505	26.8369	13.3542	15.794	23.3057	21.3796	0.0176002
jgi|Nemve1|120426|e_gw.170.117.1	5.06815	3.61106	2.47072	4.05452	5.63832	3.86447	0.0176082
jgi|Nemve1|113902|e_gw.121.51.1	142.2	202.932	136.974	193.217	122.146	97.262	0.0176161
jgi|Nemve1|235854|estExt_fgenesh1_pm.C_2570005	12.1936	26.7837	21.9908	21.4269	21.2155	29.2506	0.0176309
jgi|Nemve1|244517|estExt_fgenesh1_pg.C_1240051	32.6016	33.96	37.8262	43.1554	26.959	18.4952	0.0176368
jgi|Nemve1|200761|fgenesh1_pg.scaffold_23000126	8.6689	7.48678	5.58225	5.18821	5.18821	4.13743	0.0176379
jgi|Nemve1|103100|e_gw.67.19.1	21.3045	20.6227	16.305	11.8169	15.2256	10.6806	0.0176443
jgi|Nemve1|214512|fgenesh1_pg.scaffold_202000016	41.791	52.2935	52.8769	66.8802	41.791	28.8818	0.0176468
jgi|Nemve1|108683|e_gw.91.98.1	5.57497	4.62469	4.56134	2.78748	3.99117	2.78748	0.0176506
jgi|Nemve1|172238|estExt_gwp.C_2070021	19.3797	31.0774	17.3719	29.2442	36.1405	30.8155	0.0176513
jgi|Nemve1|238013|estExt_fgenesh1_pg.C_30032	89.653	111.564	89.7403	126.317	161.585	78.3045	0.0176613
jgi|Nemve1|217904|fgenesh1_pg.scaffold_317000027	35.6646	30.2373	21.286	43.6292	44.4045	27.277	0.0176693
jgi|Nemve1|164009|estExt_gwp.C_450291	24.4719	36.7332	40.7016	46.7051	58.8139	42.4823	0.0176708
jgi|Nemve1|245589|estExt_fgenesh1_pg.C_1680028	5.89173	6.46189	3.1676	4.81475	7.47553	6.33519	0.0176807
jgi|Nemve1|229489|fgenesh1_pm.scaffold_80000004	15.2803	27.6073	18.0411	20.2882	31.1385	18.9399	0.0176822
jgi|Nemve1|238696|estExt_fgenesh1_pg.C_70197	132.873	126.649	82.6856	74.7577	151.547	98.2792	0.0176903
jgi|Nemve1|203257|fgenesh1_pg.scaffold_41000096	3.52575	4.19519	3.25797	2.00834	4.64149	2.99019	0.0177006
jgi|Nemve1|102625|e_gw.65.24.1	95.7239	134.774	67.5506	95.7895	137.329	142.177	0.0177019
jgi|Nemve1|248643|estExt_fgenesh1_pg.C_8590005	77.2977	72.1752	61.6674	37.3682	43.7385	52.9985	0.0177118
jgi|Nemve1|80438|e_gw.3.209.1	18.0613	12.7701	11.1421	8.59822	11.2438	9.3105	0.0177367
jgi|Nemve1|242484|estExt_fgenesh1_pg.C_650017	2.75182	4.7174	6.15883	5.30708	3.73461	3.93117	0.0177492
jgi|Nemve1|218026|fgenesh1_pg.scaffold_325000001	15.4514	25.2285	12.396	24.181	24.0937	17.8084	0.0177545
jgi|Nemve1|80075|e_gw.2.146.1	235.003	287.041	331.136	338.137	202.402	163.949	0.0177807
jgi|Nemve1|91976|e_gw.28.127.1	11.0429	13.4827	9.11684	6.29191	8.1538	7.57597	0.0177894
jgi|Nemve1|200495|fgenesh1_pg.scaffold_22000017	14.0541	18.2572	13.0034	8.60323	17.7975	11.0331	0.0177931
jgi|Nemve1|189473|estExt_GenewiseH_1.C_1440003	16.4715	33.3865	28.5084	17.2951	23.6303	28.1916	0.0178151
jgi|Nemve1|195431|estExt_GenewiseH_1.C_6000007	10.9717	15.9873	14.1065	15.5694	11.5987	7.10548	0.0178232
jgi|Nemve1|138352|e_gw.428.49.1	9.33552	6.19937	6.2723	3.79255	6.19937	6.34523	0.0178342
jgi|Nemve1|99103|e_gw.52.67.1	148.561	156.752	194.859	292.594	213.175	152.224	0.0178445
jgi|Nemve1|243970|estExt_fgenesh1_pg.C_1030045	13.5228	33.7401	23.9662	26.0191	26.4654	22.7165	0.0178837
jgi|Nemve1|241289|estExt_fgenesh1_pg.C_430046	231.048	272.464	343.515	275.856	475.306	413.36	0.0178994
jgi|Nemve1|87242|e_gw.15.124.1	10.283	9.82846	6.41975	11.0215	15.2824	12.8963	0.0179033
jgi|Nemve1|247445|estExt_fgenesh1_pg.C_3030021	6.19937	8.46031	8.75205	9.99192	13.5657	12.5446	0.0179264
jgi|Nemve1|162416|estExt_gwp.C_300331	80.6329	79.5757	64.2808	48.3515	67.1001	37.8495	0.0179315
jgi|Nemve1|241000|estExt_fgenesh1_pg.C_380037	141.037	137.865	128.984	67.0296	92.6151	94.0952	0.0179336
jgi|Nemve1|240289|estExt_fgenesh1_pg.C_270004	70.5352	65.9958	58.6629	30.1171	61.9802	72.543	0.017938
jgi|Nemve1|79346|e_gw.1.43.1	65.3158	57.3335	41.3688	29.522	62.2749	58.4105	0.0179411
jgi|Nemve1|241673|estExt_fgenesh1_pg.C_490052	3.52234	4.14727	3.52234	1.87479	2.3861	3.52234	0.0179531
jgi|Nemve1|80242|e_gw.2.199.1	13.4335	15.308	15.9328	12.2732	9.0152	7.67631	0.0179652
jgi|Nemve1|217321|fgenesh1_pg.scaffold_293000009	9.55432	10.0649	9.62725	4.59482	6.63697	7.43924	0.0179854
jgi|Nemve1|248783|estExt_fgenesh1_pg.C_21690001	4.109	3.27436	1.92609	4.43001	3.27436	2.82494	0.0179888
jgi|Nemve1|59568|gw.103.163.1	12.2641	10.5725	6.7664	7.75316	14.5196	11.7707	0.0180103
jgi|Nemve1|243313|estExt_fgenesh1_pg.C_850026	43.177	56.4142	53.2328	25.5085	34.144	41.2454	0.0180125
jgi|Nemve1|167102|estExt_gwp.C_820112	24.1411	28.1524	28.2983	45.073	47.9175	36.321	0.0180396
jgi|Nemve1|235218|estExt_fgenesh1_pm.C_1090006	40.6799	49.1476	34.8311	19.467	37.45	39.1086	0.0180498
jgi|Nemve1|169148|estExt_gwp.C_1210011	8.33965	8.95949	5.29681	10.1992	12.2841	11.7206	0.0180572
jgi|Nemve1|168448|estExt_gwp.C_1050011	13.4306	9.43943	7.72893	5.82838	10.073	8.2991	0.018064
jgi|Nemve1|220197|fgenesh1_pg.scaffold_485000005	87.3993	88.4566	71.3996	88.527	62.1663	40.0345	0.0180853
jgi|Nemve1|167977|estExt_gwp.C_970080	19.5239	30.3078	20.2287	20.4402	17.8323	12.7575	0.018094
jgi|Nemve1|40037|gw.327.39.1	28.3136	31.3311	43.0803	58.6816	48.6018	35.1833	0.0181048
jgi|Nemve1|233222|fgsh_est.C_scaffold_154000002	2.89741	1.59073	1.70436	3.06784	3.06784	2.55654	0.0181185
jgi|Nemve1|117224|e_gw.145.10.1	11.4659	12.1211	10.8107	19.5903	14.0867	8.97617	0.018119
jgi|Nemve1|247419|estExt_fgenesh1_pg.C_3010014	22.2605	27.2363	26.6253	26.7126	46.1796	37.1881	0.0181238
jgi|Nemve1|240218|estExt_fgenesh1_pg.C_260044	121.725	124.403	146.817	201.512	106.007	94.4476	0.0181486
jgi|Nemve1|241947|estExt_fgenesh1_pg.C_540014	92.3341	128.801	138.647	79.9354	76.0699	75.5593	0.0181646
jgi|Nemve1|112468|e_gw.111.92.1	7.15633	4.95871	3.43729	3.88808	6.31109	4.62062	0.0181811
jgi|Nemve1|106828|e_gw.84.113.1	11.7526	10.5824	7.12278	14.8561	9.87014	7.37717	0.0181888
jgi|Nemve1|61368|gw.9.270.1	319.699	222.633	207.725	321.537	423.528	391.742	0.0181955
jgi|Nemve1|241190|estExt_fgenesh1_pg.C_410061	21.3875	34.5692	30.5536	40.3307	49.846	42.9496	0.0182079
jgi|Nemve1|239291|estExt_fgenesh1_pg.C_130138	34.7339	51.8761	67.2207	74.7966	60.1583	41.8604	0.0182367
jgi|Nemve1|89324|e_gw.21.88.1	8.86266	9.71484	9.31715	5.62438	13.9189	9.26034	0.0182424
jgi|Nemve1|208225|fgenesh1_pg.scaffold_89000087	3.61501	2.41	3.07945	4.37371	2.72241	2.00834	0.0182476
jgi|Nemve1|238399|estExt_fgenesh1_pg.C_50179	13.9228	10.7705	9.25996	8.60323	16.2214	16.6154	0.0182578
jgi|Nemve1|244697|estExt_fgenesh1_pg.C_1310033	94.4787	98.4471	77.5366	44.2121	73.6191	60.3402	0.0182629
jgi|Nemve1|207324|fgenesh1_pg.scaffold_79000050	9.30945	10.8503	7.89698	15.0877	8.1538	7.51176	0.0182686
jgi|Nemve1|240137|estExt_fgenesh1_pg.C_250045	41.3783	36.4024	38.3229	28.6331	63.2896	51.4173	0.0182783
jgi|Nemve1|230272|fgenesh1_pm.scaffold_160000004	14.6976	12.0369	11.9735	12.3536	7.72893	6.90536	0.0182914
jgi|Nemve1|247787|estExt_fgenesh1_pg.C_3510020	19.4535	28.8914	27.0295	25.1034	15.7298	14.5741	0.0183141
jgi|Nemve1|247200|estExt_fgenesh1_pg.C_2780009	1.52631	2.69648	3.25613	1.9842	2.64561	3.30701	0.0183288
jgi|Nemve1|100834|e_gw.58.191.1	21.9908	24.3872	17.3389	10.2906	23.1185	21.7793	0.018331
jgi|Nemve1|240475|estExt_fgenesh1_pg.C_300078	43.0159	37.5677	25.9109	32.1194	22.6166	21.603	0.018344
jgi|Nemve1|214830|fgenesh1_pg.scaffold_211000015	44.5923	45.1834	42.2937	84.1277	50.0432	49.8462	0.0183489
jgi|Nemve1|161857|estExt_gwp.C_250107	11.0073	11.4004	7.0761	6.42091	8.77961	5.83123	0.0183695
jgi|Nemve1|176085|estExt_gwp.C_5610007	8.91065	11.0728	14.1522	7.20714	8.84513	6.81403	0.0183839
jgi|Nemve1|202352|fgenesh1_pg.scaffold_34000054	4.72849	8.99727	7.22408	4.33445	7.15841	5.4509	0.0183957
jgi|Nemve1|235152|estExt_fgenesh1_pm.C_980020	241.447	213.553	207.573	98.0961	231.494	192.131	0.0184036
jgi|Nemve1|118942|e_gw.157.25.1	16.7018	15.6808	10.4295	11.8882	9.84605	8.02271	0.018406
jgi|Nemve1|48851|gw.327.45.1	2.76073	3.40276	3.21016	5.07205	2.76073	2.37552	0.0184299
jgi|Nemve1|203577|fgenesh1_pg.scaffold_44000022	1.60508	1.79769	2.18291	0.963047	1.34827	2.0545	0.0184392
jgi|Nemve1|17350|gw.100.74.1	15.5846	11.4667	7.79229	11.53	16.9783	16.6616	0.0184393
jgi|Nemve1|105921|e_gw.79.64.1	30.4848	39.388	31.4991	27.8364	21.5253	17.2991	0.0184527
jgi|Nemve1|199362|fgenesh1_pg.scaffold_14000127	36.7813	33.3331	33.6465	31.3477	17.6592	20.376	0.0184637
jgi|Nemve1|232602|fgsh_est.C_scaffold_62000003	16.4755	11.3624	10.7374	8.46497	18.2934	13.5212	0.0184707
jgi|Nemve1|199476|fgenesh1_pg.scaffold_15000068	10.3398	8.01048	6.81743	9.65802	5.738	4.99945	0.0184774
jgi|Nemve1|201841|fgenesh1_pg.scaffold_31000001	194.774	179.518	95.924	150.365	107.105	122.361	0.0184817
jgi|Nemve1|245946|estExt_fgenesh1_pg.C_1860029	0.965802	1.07943	1.81798	1.07943	1.81798	1.53392	0.0184953
jgi|Nemve1|230667|fgenesh1_pm.scaffold_229000018	311.818	243.452	275.238	343.604	496.032	456.562	0.0185207
jgi|Nemve1|169424|estExt_gwp.C_1270032	133.959	174.92	158.619	229.674	290.489	227.271	0.0185262
jgi|Nemve1|20288|gw.85.15.1	125.404	205.731	159.736	119.442	213.79	238.622	0.0185332
jgi|Nemve1|82183|e_gw.5.35.1	39.7325	32.1143	39.0757	32.377	30.8665	16.287	0.0185407
jgi|Nemve1|204982|fgenesh1_pg.scaffold_55000089	5.17705	4.10593	3.3026	5.4002	5.04316	2.49926	0.0185444
jgi|Nemve1|203627|fgenesh1_pg.scaffold_44000072	21.9789	28.9999	28.8982	47.7227	42.3806	39.2262	0.0185519
jgi|Nemve1|217043|fgenesh1_pg.scaffold_282000001	26.0199	24.2019	21.8726	18.9184	15.6801	11.5896	0.0185609
jgi|Nemve1|236959|estExt_fgenesh1_kg.C_800001	56.5099	76.2123	91.7336	76.2757	56.0664	40.4819	0.0185663
jgi|Nemve1|124985|e_gw.216.14.1	11.0783	13.9757	9.88527	9.48759	7.66961	6.07887	0.0185672
jgi|Nemve1|119044|e_gw.158.65.1	20.0192	18.9422	15.2678	30.5356	30.9791	20.6527	0.0185742
jgi|Nemve1|110416|e_gw.100.142.1	12.5856	9.28298	7.3639	5.66797	8.43502	11.4252	0.0185751
jgi|Nemve1|12480|gw.525.10.1	19.7677	26.7291	15.6303	17.0094	14.3168	12.2809	0.0185781
jgi|Nemve1|245995|estExt_fgenesh1_pg.C_1900030	11.5896	11.8737	6.47656	8.80585	15.2824	10.0557	0.0185795
jgi|Nemve1|51468|gw.217.95.1	22.4077	21.4249	10.4176	13.6936	21.5559	19.2627	0.0186029
jgi|Nemve1|246929|estExt_fgenesh1_pg.C_2550019	6.1635	10.4009	10.4651	13.8679	11.6208	14.8309	0.0186081
jgi|Nemve1|122551|e_gw.191.3.1	32.7388	31.161	26.8221	41.6983	53.9824	51.3903	0.0186153
jgi|Nemve1|143747|e_gw.859.3.1	3.02098	3.54637	4.99119	6.6987	4.99119	5.58225	0.0186298
jgi|Nemve1|236522|estExt_fgenesh1_kg.C_200006	103.493	91.8965	81.8316	50.2513	116.475	117.277	0.0186442
jgi|Nemve1|107804|e_gw.88.68.1	27.4109	37.9738	26.0142	27.6728	21.3875	15.8879	0.0186446
jgi|Nemve1|32018|gw.7.74.1	22.6097	20.6019	11.3485	13.0071	23.308	20.2527	0.0186566
jgi|Nemve1|222965|fgenesh1_pg.scaffold_2110000001	4.74069	4.95949	2.99028	2.40681	5.03243	3.93842	0.0186738
jgi|Nemve1|195236|estExt_GenewiseH_1.C_5450006	47.0403	53.1191	49.3695	53.46	94.7623	67.038	0.0186791
jgi|Nemve1|198315|fgenesh1_pg.scaffold_9000104	112.703	106.148	81.0558	50.9594	118.553	85.2848	0.0186897
jgi|Nemve1|238072|estExt_fgenesh1_pg.C_30131	30.034	39.2189	50.5451	66.2664	58.0395	40.2332	0.0187181
jgi|Nemve1|203598|fgenesh1_pg.scaffold_44000043	10.5734	14.1198	6.56735	8.34053	13.266	13.069	0.018729
jgi|Nemve1|240424|estExt_fgenesh1_pg.C_290031	33.7683	41.864	28.0066	29.8299	43.1768	19.0357	0.0187307
jgi|Nemve1|236165|estExt_fgenesh1_pm.C_5410002	453.079	398.011	393.518	177.533	363.738	347.437	0.0187323
jgi|Nemve1|238733|estExt_fgenesh1_pg.C_80026	28.3699	39.0496	39.7048	54.3812	54.3156	28.763	0.0187718
jgi|Nemve1|124120|e_gw.206.59.1	46.3946	43.6778	31.3477	58.5157	37.1993	26.2276	0.0187728
jgi|Nemve1|247170|estExt_fgenesh1_pg.C_2740015	3.52417	3.8061	4.01755	7.1893	5.63866	4.44045	0.0187806
jgi|Nemve1|188125|estExt_GenewiseH_1.C_1160111	376.802	406.024	372.74	314.428	243.601	183.52	0.0187815
jgi|Nemve1|248115|estExt_fgenesh1_pg.C_4220015	11.4982	8.29296	8.1912	5.64735	12.1087	12.1596	0.0188062
jgi|Nemve1|87652|e_gw.16.67.1	22.2143	21.6364	12.5838	11.2355	18.1695	13.9321	0.0188092
jgi|Nemve1|176010|estExt_gwp.C_5360008	3.26824	3.83173	2.25396	2.14126	1.97222	2.14126	0.01883
jgi|Nemve1|194920|estExt_GenewiseH_1.C_4440010	23.7445	27.4982	42.5131	47.0525	50.2825	40.8545	0.0188346
jgi|Nemve1|237113|estExt_fgenesh1_kg.C_1180004	92.3193	113.681	127.94	164.698	100.898	71.6398	0.0188476
jgi|Nemve1|193513|estExt_GenewiseH_1.C_2970031	0.704833	1.05725	0.704833	1.48015	1.05725	1.12773	0.0188517
jgi|Nemve1|245135|estExt_fgenesh1_pg.C_1470028	10.0157	11.685	12.648	16.5644	21.4438	17.5917	0.0188712
jgi|Nemve1|243273|estExt_fgenesh1_pg.C_830093	227.706	265.235	276.223	269.968	167.188	129.377	0.0188798
jgi|Nemve1|248189|estExt_fgenesh1_pg.C_4510004	12.1231	23.5414	16.9865	22.5547	29.1096	22.9071	0.0188866
jgi|Nemve1|244239|estExt_fgenesh1_pg.C_1150008	15.0834	30.4488	16.8455	30.7307	24.3872	26.1493	0.0188936
jgi|Nemve1|193324|estExt_GenewiseH_1.C_2880013	27.8409	24.3167	19.1715	13.3213	31.2946	26.9951	0.0188947
jgi|Nemve1|247335|estExt_fgenesh1_pg.C_2930013	52.3507	31.3301	30.1697	35.1682	54.8499	55.6086	0.0189007
jgi|Nemve1|115865|e_gw.134.48.1	11.1071	10.4651	9.18105	5.00784	11.8134	12.2628	0.0189044
jgi|Nemve1|98418|e_gw.49.69.1	9.5444	6.7038	10.567	15.2824	8.97628	8.46497	0.0189126
jgi|Nemve1|230001|fgenesh1_pm.scaffold_129000007	41.6999	49.54	29.2013	21.1908	42.4385	36.246	0.0189316
jgi|Nemve1|200856|fgenesh1_pg.scaffold_24000070	4.10593	2.54389	2.90093	3.43649	5.62334	4.0613	0.0189578
jgi|Nemve1|216176|fgenesh1_pg.scaffold_252000001	15.6233	13.1235	9.60121	12.6122	9.94208	6.64699	0.0189728
jgi|Nemve1|105967|e_gw.80.152.1	4.36997	4.29948	1.97353	2.88982	4.36997	3.66513	0.0189907
jgi|Nemve1|20665|gw.65.40.1	49.2878	32.0561	31.4859	19.8925	33.7032	39.3415	0.018995
jgi|Nemve1|229146|fgenesh1_pm.scaffold_56000009	76.5783	84.7489	52.7427	45.6427	97.6529	61.8712	0.0189958
jgi|Nemve1|186367|estExt_GenewiseH_1.C_830052	55.6916	92.1204	63.3573	114.135	107.911	73.2508	0.0190222
jgi|Nemve1|100782|e_gw.58.44.1	2.59743	4.43463	2.78748	5.57497	4.37128	3.80111	0.0190255
jgi|Nemve1|18960|gw.358.23.1	12.6302	13.8798	11.1574	18.0304	21.1545	22.6719	0.01903
jgi|Nemve1|224141|fgenesh1_pg.scaffold_4024000001	1.38352	2.41	2.63315	2.45463	1.38352	1.74056	0.0190364
jgi|Nemve1|192342|estExt_GenewiseH_1.C_2360063	32.7597	56.8054	48.7465	25.4216	51.1052	40.4255	0.0190423
jgi|Nemve1|159148|estExt_gwp.C_60363	15.0848	23.0736	11.8269	10.8004	19.0569	18.1197	0.0190507
jgi|Nemve1|238758|estExt_fgenesh1_pg.C_80081	40.956	43.042	40.7525	76.1629	62.1717	41.0578	0.0190513
jgi|Nemve1|191358|estExt_GenewiseH_1.C_2040006	193.893	348.238	273.12	425.153	249.943	239.542	0.0190618
jgi|Nemve1|222765|fgenesh1_pg.scaffold_1913000001	2.1187	2.18291	2.63233	2.43972	3.59537	4.1732	0.019074
jgi|Nemve1|195888|estExt_GenewiseH_1.C_21470004	202.614	211.78	199.559	105.366	202.701	278.038	0.0190874
jgi|Nemve1|209974|fgenesh1_pg.scaffold_114000046	340.57	245.501	229.908	224.273	157.902	164.65	0.0190915
jgi|Nemve1|218832|fgenesh1_pg.scaffold_370000010	7.32537	7.88886	7.66347	9.57933	6.87458	3.66269	0.0191108
jgi|Nemve1|126404|e_gw.231.51.1	12.3087	9.68986	10.2136	13.269	8.38042	5.58694	0.0191162
jgi|Nemve1|244933|estExt_fgenesh1_pg.C_1390049	39.2148	45.8034	29.3953	19.0056	39.785	31.866	0.0191217
jgi|Nemve1|235967|estExt_fgenesh1_pm.C_3060001	81.6086	72.9357	136.885	100.522	92.8937	60.6056	0.0191245
jgi|Nemve1|233739|fgsh_est.C_scaffold_432000002	21.2125	22.1976	14.9079	9.45698	19.6364	16.09	0.0191276
jgi|Nemve1|194939|estExt_GenewiseH_1.C_4510014	26.3351	33.7562	30.9322	13.7914	32.0487	24.8246	0.0191318
jgi|Nemve1|191334|estExt_GenewiseH_1.C_2020069	1.90056	3.35765	3.48436	2.59743	3.67441	4.56134	0.019142
jgi|Nemve1|205728|fgenesh1_pg.scaffold_62000047	0.513625	0.321016	0.642031	0.385219	0.321016	0.385219	0.0191443
jgi|Nemve1|248697|estExt_fgenesh1_pg.C_14020002	5.01506	5.40951	3.88808	2.42301	3.88808	3.0992	0.0192091
jgi|Nemve1|168163|estExt_gwp.C_1000135	83.1931	149.276	124.833	101.613	110.604	64.2499	0.0192264
jgi|Nemve1|125631|e_gw.221.9.1	8.20582	7.68205	4.97587	5.93613	4.3648	4.19021	0.0192416
jgi|Nemve1|114817|e_gw.128.13.1	4.33445	4.72849	3.4807	2.2329	5.38523	3.54637	0.019256
jgi|Nemve1|212744|fgenesh1_pg.scaffold_162000007	4.28445	6.02501	3.12408	7.45316	6.06964	5.93575	0.0192697
jgi|Nemve1|82732|e_gw.6.244.1	6.56404	7.80391	6.78284	3.28202	8.38738	6.41817	0.0192731
jgi|Nemve1|201544|fgenesh1_pg.scaffold_29000026	67.7232	71.8411	32.943	61.0712	69.6871	86.0319	0.0192739
jgi|Nemve1|56831|gw.296.55.1	3.43729	3.94443	3.32459	2.19761	5.46585	3.66269	0.0192798
jgi|Nemve1|173996|estExt_gwp.C_2800053	4.19021	8.8169	8.20582	7.59475	10.1263	10.3009	0.019284
jgi|Nemve1|239424|estExt_fgenesh1_pg.C_140156	16.9783	17.2317	18.7522	12.8604	12.607	7.98234	0.0193112
jgi|Nemve1|178554|estExt_GenewiseH_1.C_70110	216.607	201.669	213.069	214.904	127.632	105.552	0.0193353
jgi|Nemve1|192292|estExt_GenewiseH_1.C_2350023	1.40873	2.02856	1.85952	3.04285	2.8738	1.91587	0.0193442
jgi|Nemve1|230183|fgenesh1_pm.scaffold_147000011	21.7347	18.6106	17.1824	8.92594	13.1658	15.6204	0.0193469
jgi|Nemve1|243519|estExt_fgenesh1_pg.C_910018	171.368	142.319	108.15	82.6535	94.3566	94.9836	0.019366
jgi|Nemve1|244800|estExt_fgenesh1_pg.C_1340031	45.9808	45.6427	38.3173	35.4435	27.0475	21.0182	0.0193825
jgi|Nemve1|159748|estExt_gwp.C_90651	30.7297	58.2542	53.3191	54.9472	72.9577	74.6366	0.0193887
jgi|Nemve1|89715|e_gw.22.242.1	23.9801	20.7042	23.718	24.0456	16.1833	10.6142	0.0193916
jgi|Nemve1|242152|estExt_fgenesh1_pg.C_580004	0.803335	0.892594	0.624816	1.29426	1.29426	1.24963	0.0193916
jgi|Nemve1|142057|e_gw.635.7.1	1.97353	2.25547	1.2687	1.48015	2.60788	1.40967	0.0193997
jgi|Nemve1|197323|fgenesh1_pg.scaffold_5000129	5.18821	6.89572	3.67772	8.73458	7.81515	6.83004	0.0194083
jgi|Nemve1|34458|gw.24.84.1	31.5804	39.7048	21.4249	26.5354	19.8524	20.2455	0.0194235
jgi|Nemve1|95909|e_gw.41.159.1	15.5694	15.5694	9.92678	24.7647	19.2266	16.8233	0.0194439
jgi|Nemve1|235823|estExt_fgenesh1_pm.C_2430006	58.1158	65.6505	71.6783	38.9186	41.8669	36.1667	0.019453
jgi|Nemve1|97921|e_gw.47.120.1	14.1671	12.4755	11.3478	23.8938	16.0702	12.828	0.0194557
jgi|Nemve1|57994|gw.59.170.1	7.04833	6.20253	5.63866	3.66513	8.38751	8.59896	0.0194586
jgi|Nemve1|247996|estExt_fgenesh1_pg.C_3870005	0.394443	0.281745	0.507141	0.450792	0.676188	0.56349	0.0194843
jgi|Nemve1|982|gw.1632.1.1	33.3471	26.538	20.5146	14.8403	21.6494	31.6011	0.0194939
jgi|Nemve1|90971|e_gw.26.223.1	3.71402	4.4263	4.57893	2.39122	4.27367	6.10524	0.0195136
jgi|Nemve1|20603|gw.74.19.1	19.2315	29.356	28.4911	14.2964	30.7806	20.0456	0.0195156
jgi|Nemve1|238813|estExt_fgenesh1_pg.C_80223	15.2768	19.9035	14.142	12.0468	25.4031	22.9588	0.0195253
jgi|Nemve1|41253|gw.182.66.1	12.1341	9.51526	8.46771	17.11	14.4038	8.90419	0.0195269
jgi|Nemve1|104958|e_gw.75.16.1	12.3912	8.66742	9.75887	11.1071	5.39306	7.06234	0.0195713
jgi|Nemve1|197305|fgenesh1_pg.scaffold_5000111	6.27301	6.06156	4.6519	10.8544	7.96461	7.40075	0.0195948
jgi|Nemve1|140667|e_gw.536.14.1	8.03857	9.71751	14.7035	13.9403	8.8526	7.5298	0.0195976
jgi|Nemve1|242678|estExt_fgenesh1_pg.C_690049	14.8847	20.9068	17.7253	9.0899	22.4407	18.6343	0.0196082
jgi|Nemve1|172038|estExt_gwp.C_1990057	66.5786	96.3047	47.1893	51.8119	82.9504	53.417	0.0196245
jgi|Nemve1|158927|estExt_gwp.C_50515	10.1441	17.078	17.9127	8.3464	14.3173	11.8776	0.0196298
jgi|Nemve1|210626|fgenesh1_pg.scaffold_124000070	4.11787	7.28547	9.37608	7.47553	7.34882	4.8781	0.0196303
jgi|Nemve1|222046|fgenesh1_pg.scaffold_1315000001	31.7163	26.3875	22.8563	16.1792	17.2706	16.0508	0.0196369
jgi|Nemve1|197434|fgenesh1_pg.scaffold_5000240	13.3547	17.3555	14.538	25.3571	13.6365	12.0587	0.0196477
jgi|Nemve1|244490|estExt_fgenesh1_pg.C_1230045	62.9084	70.9541	82.2941	97.2452	54.4826	41.939	0.019663
jgi|Nemve1|223279|fgenesh1_pg.scaffold_2524000002	4.53147	6.30466	2.88963	5.58225	7.22408	5.58225	0.0196809
jgi|Nemve1|105828|e_gw.79.104.1	57.6154	49.1476	41.9894	31.1647	37.5373	25.4904	0.0196932
jgi|Nemve1|240697|estExt_fgenesh1_pg.C_330018	33.751	27.168	19.5401	33.6465	46.6036	40.961	0.0197141
jgi|Nemve1|1771|gw.4220.1.1	1.33039	0.823575	1.7105	1.64715	1.01363	1.01363	0.0197165
jgi|Nemve1|151659|e_gw.4331.6.1	0.963047	1.66928	1.15566	1.02725	1.86189	1.02725	0.0197408
jgi|Nemve1|238213|estExt_fgenesh1_pg.C_40126	42.053	34.6697	36.8526	51.8119	30.2397	21.1228	0.0197543
jgi|Nemve1|215383|fgenesh1_pg.scaffold_226000033	39.8484	44.8532	22.1098	28.5084	30.2822	22.5533	0.0197619
jgi|Nemve1|174414|estExt_gwp.C_3040059	37.1736	68.1195	59.0027	67.1565	52.3255	32.6794	0.0197638
jgi|Nemve1|124634|e_gw.212.24.1	14.0547	16.1498	13.4436	10.5628	8.11853	7.85664	0.019787
jgi|Nemve1|214133|fgenesh1_pg.scaffold_192000040	6.26954	11.0762	5.74708	5.01563	7.10548	6.68751	0.0197889
jgi|Nemve1|238775|estExt_fgenesh1_pg.C_80106	16.9936	20.859	18.744	28.5171	30.5592	35.2999	0.0198016
jgi|Nemve1|134820|e_gw.346.15.1	42.2281	39.3384	38.025	20.8185	51.0283	51.6194	0.0198036
jgi|Nemve1|248787|estExt_fgenesh1_pg.C_22980002	72.0192	62.242	41.1164	45.4812	45.132	32.1249	0.0198528
jgi|Nemve1|163878|estExt_gwp.C_440168	47.5762	48.422	32.7043	35.2417	60.3337	70.1309	0.0198555
jgi|Nemve1|199049|fgenesh1_pg.scaffold_13000056	2.82494	2.50392	2.88914	1.60508	2.63233	4.109	0.0198806
jgi|Nemve1|225635|fgenesh1_pg.scaffold_9937000001	4.28253	2.70475	4.22618	5.35316	3.54999	2.42301	0.0198832
jgi|Nemve1|156526|e_gw.11219.2.1	0.340871	0.28406	0.28406	0.227248	0.397683	0.511307	0.019893
jgi|Nemve1|200306|fgenesh1_pg.scaffold_20000144	231.346	213.06	104.91	166.456	147.857	131.138	0.0199095
jgi|Nemve1|228574|fgenesh1_pm.scaffold_25000001	49.2706	56.6743	46.7154	74.8232	53.0053	28.9596	0.0199244
jgi|Nemve1|178508|estExt_GenewiseH_1.C_70040	19.215	33.2459	23.8356	22.3706	38.9935	37.8665	0.0199257
jgi|Nemve1|237340|estExt_fgenesh1_kg.C_1830006	137.157	141.528	124.423	64.6189	86.412	93.254	0.019926
jgi|Nemve1|176382|estExt_gwp.C_7330011	23.947	16.7883	15.838	11.0232	12.9238	12.3536	0.0199263
jgi|Nemve1|223673|fgenesh1_pg.scaffold_3156000001	4.07176	4.72849	5.25388	4.99119	8.53755	7.42111	0.0199269
jgi|Nemve1|131745|e_gw.299.35.1	30.8489	45.2791	24.2019	27.5538	46.6426	26.0199	0.0199329
jgi|Nemve1|118443|e_gw.153.77.1	3.67441	3.35765	2.91419	1.7105	4.43463	3.67441	0.0199428
jgi|Nemve1|149502|e_gw.3003.3.1	0.511307	0.454495	0.227248	0.28406	0.454495	0.397683	0.0199492
jgi|Nemve1|121810|e_gw.183.45.1	0.19702	0.19702	0.262694	0.19702	0.394041	0.262694	0.0199591
jgi|Nemve1|239603|estExt_fgenesh1_pg.C_170029	15.3641	17.8957	13.269	10.9993	25.4904	16.8481	0.0199692
jgi|Nemve1|149434|e_gw.2990.3.1	0.490927	0.490927	0.223149	0.490927	0.312408	0.446297	0.0199743
jgi|Nemve1|102520|e_gw.65.186.1	4.06221	3.73461	8.32097	6.02779	5.76571	5.24156	0.0199895
jgi|Nemve1|130948|e_gw.288.1.1	28.3699	24.8974	19.1972	12.6453	18.2144	15.6592	0.0200065
jgi|Nemve1|183220|estExt_GenewiseH_1.C_450214	58.0978	59.9786	61.755	48.9024	49.0069	24.5557	0.0200124
jgi|Nemve1|195792|estExt_GenewiseH_1.C_16340002	10.5315	12.1596	10.5824	6.51226	8.14033	5.59647	0.0200216
jgi|Nemve1|248429|estExt_fgenesh1_pg.C_5580006	76.4658	79.7601	74.7553	53.469	44.0929	39.6583	0.0200488
jgi|Nemve1|241281|estExt_fgenesh1_pg.C_430034	19.0041	22.7279	13.29	10.8503	11.8134	14.3173	0.0200492
jgi|Nemve1|167758|estExt_gwp.C_920122	15.5646	12.9377	11.2958	7.22408	18.1916	14.3825	0.0200691
jgi|Nemve1|247828|estExt_fgenesh1_pg.C_3560012	296.672	328.032	333.372	163.618	215.828	189.638	0.0200781
jgi|Nemve1|228353|fgenesh1_pm.scaffold_15000001	20.5034	25.5403	13.635	23.1999	34.7999	23.9122	0.0200861
jgi|Nemve1|240892|estExt_fgenesh1_pg.C_360061	61.9548	66.8182	40.5279	29.8144	40.3869	49.3383	0.0200908
jgi|Nemve1|216636|fgenesh1_pg.scaffold_266000034	32.9362	24.3972	13.4185	28.3136	21.2512	20.2882	0.0201031
jgi|Nemve1|91296|e_gw.26.278.1	4.19325	7.20714	6.35539	3.07942	4.84844	4.78292	0.0201044
jgi|Nemve1|11959|gw.307.27.1	8.65816	19.4586	18.9676	15.308	12.6302	12.05	0.0201069
jgi|Nemve1|247741|estExt_fgenesh1_pg.C_3460020	8.31703	12.0526	9.7267	18.819	14.2376	11.3478	0.0201151
jgi|Nemve1|90236|e_gw.23.132.1	5.2267	5.34032	4.7722	2.44291	5.39713	6.59018	0.0201192
jgi|Nemve1|30743|gw.17.23.1	11.6899	9.98237	7.48678	6.04196	13.0034	13.0034	0.0201195
jgi|Nemve1|167042|estExt_gwp.C_810091	36.4015	36.7959	32.0062	15.8341	36.4015	24.7936	0.0201372
jgi|Nemve1|242477|estExt_fgenesh1_pg.C_650006	97.0748	105.9	86.6453	50.4701	87.7393	132.01	0.0201642
jgi|Nemve1|242831|estExt_fgenesh1_pg.C_730056	66.3712	55.9536	42.4566	44.7498	34.0046	30.27	0.020181
jgi|Nemve1|104536|e_gw.73.96.1	5.23776	7.59475	6.4599	11.5231	10.8247	8.99149	0.0201897
jgi|Nemve1|159761|estExt_gwp.C_100035	64.3655	53.9758	66.5829	69.7505	50.4281	27.9382	0.0201911
jgi|Nemve1|220766|fgenesh1_pg.scaffold_576000002	0.785664	1.39674	0.960256	1.74592	1.57133	1.13485	0.0201948
jgi|Nemve1|205274|fgenesh1_pg.scaffold_58000012	3.3026	2.49926	2.45463	4.28445	4.9539	4.5076	0.0202331
jgi|Nemve1|245915|estExt_fgenesh1_pg.C_1850008	17.6118	12.5437	10.8965	9.18603	16.9783	19.8925	0.0202449
jgi|Nemve1|213328|fgenesh1_pg.scaffold_174000013	81.5399	80.4459	97.5124	111.662	61.4831	47.5528	0.0202458
jgi|Nemve1|237705|estExt_fgenesh1_pg.C_10033	15.7777	25.4698	18.3134	17.8626	21.8634	10.0865	0.0202505
jgi|Nemve1|190325|estExt_GenewiseH_1.C_1690007	271.316	290.972	198.262	146.371	235.411	142.636	0.0202669
jgi|Nemve1|187756|estExt_GenewiseH_1.C_1080050	20.5743	16.8254	14.3708	7.8102	13.7013	16.3345	0.0202696
jgi|Nemve1|239390|estExt_fgenesh1_pg.C_140087	13.8975	13.166	9.6133	13.4795	22.3614	18.5996	0.0202702
jgi|Nemve1|236736|estExt_fgenesh1_kg.C_460003	86.7921	98.5756	97.1185	61.1346	68.5468	43.6495	0.0202914
jgi|Nemve1|215748|fgenesh1_pg.scaffold_237000009	1.07063	1.40873	0.56349	1.12698	1.29603	0.901584	0.0202921
jgi|Nemve1|237840|estExt_fgenesh1_pg.C_20008	121.443	125.39	73.5846	138.923	85.1438	68.5803	0.0202994
jgi|Nemve1|63628|gw.10.299.1	7.15827	11.5231	8.90419	4.71398	7.24557	6.72179	0.0203002
jgi|Nemve1|122631|e_gw.191.96.1	38.5544	80.9853	58.2897	45.9551	45.3913	40.7394	0.0203249
jgi|Nemve1|136694|e_gw.380.1.1	20.1582	25.9379	17.1274	35.4531	24.8806	16.6341	0.0203352
jgi|Nemve1|227033|fgenesh1_kg.scaffold_114000001	52.3664	54.4815	88.2498	102.982	91.1672	107.14	0.0203418
jgi|Nemve1|44036|gw.459.19.1	5.76176	6.12643	4.88656	7.80391	6.9287	11.013	0.020345
jgi|Nemve1|238792|estExt_fgenesh1_pg.C_80174	3.71904	4.73332	3.88808	1.74682	3.38094	3.83173	0.0203682
jgi|Nemve1|198417|fgenesh1_pg.scaffold_10000009	2.75829	2.36425	2.03588	1.2478	3.02098	2.95531	0.020369
jgi|Nemve1|209258|fgenesh1_pg.scaffold_103000033	8.86266	9.03309	6.7038	6.30612	12.5554	12.7827	0.0203865
jgi|Nemve1|82063|e_gw.5.135.1	1.77385	1.96391	1.64715	1.5838	3.1676	2.72413	0.0203912
jgi|Nemve1|92816|e_gw.31.53.1	6.74851	7.33818	3.47253	5.76571	5.045	3.73461	0.0204001
jgi|Nemve1|181003|estExt_GenewiseH_1.C_240186	24.1678	26.8605	27.5829	42.2937	27.4515	16.8124	0.0204249
jgi|Nemve1|242878|estExt_fgenesh1_pg.C_740052	13.7591	28.4355	17.3627	29.1562	28.3699	20.311	0.0204253
jgi|Nemve1|240826|estExt_fgenesh1_pg.C_350038	18.6189	16.6286	20.6092	34.5413	31.2027	28.763	0.0204258
jgi|Nemve1|95059|e_gw.38.18.1	30.1113	28.121	24.8466	12.5838	18.7473	20.6092	0.0204546
jgi|Nemve1|30846|gw.1.54.1	10.7213	20.5673	12.5446	23.0471	19.1086	14.0762	0.0204745
jgi|Nemve1|161593|estExt_gwp.C_220317	24.7771	35.0543	28.6438	56.9823	38.2595	35.156	0.0204838
jgi|Nemve1|166166|estExt_gwp.C_690251	87.0829	173.145	141.273	82.7068	138.72	162.132	0.0204865
jgi|Nemve1|109235|e_gw.94.15.1	13.3213	17.7618	9.3038	13.8147	21.7089	20.0173	0.0204909
jgi|Nemve1|162417|estExt_gwp.C_300334	201.479	206.717	184.195	166.735	306.933	339.32	0.0205018
jgi|Nemve1|114506|e_gw.126.150.1	6.7664	10.0086	6.7664	5.0748	4.229	6.41398	0.0205332
jgi|Nemve1|175302|estExt_gwp.C_3790013	2.23859	2.95087	1.88245	3.96841	3.56139	2.18771	0.0205378
jgi|Nemve1|237734|estExt_fgenesh1_pg.C_10089	4.48814	8.86266	6.30612	10.1693	5.85163	8.69222	0.0205471
jgi|Nemve1|174974|estExt_gwp.C_3480026	50.9959	49.3054	47.1078	32.1753	34.5419	22.5396	0.0205472
jgi|Nemve1|88954|e_gw.20.31.1	21.6299	14.1065	12.8526	10.8672	14.211	9.40431	0.020549
jgi|Nemve1|228040|fgenesh1_pm.scaffold_5000028	55.8694	73.3286	48.7112	32.2122	52.2903	35.8787	0.0205533
jgi|Nemve1|244559|estExt_fgenesh1_pg.C_1260042	4.59686	6.56057	8.52427	11.2467	6.51594	7.58705	0.0205672
jgi|Nemve1|126319|e_gw.230.8.1	3.34376	3.86622	3.13477	1.98536	1.77637	2.50782	0.0205682
jgi|Nemve1|102068|e_gw.63.94.1	5.13625	8.218	5.39306	3.33856	7.19075	6.80553	0.020593
jgi|Nemve1|223274|fgenesh1_pg.scaffold_2514000001	11.6977	14.4911	12.0468	12.8325	6.28531	7.85664	0.0206221
jgi|Nemve1|163150|estExt_gwp.C_370106	75.5015	60.8998	57.6437	27.728	53.37	52.963	0.0206257
jgi|Nemve1|169525|estExt_gwp.C_1280074	28.2368	29.1017	13.4315	24.5227	36.3771	26.2525	0.0206418
jgi|Nemve1|113088|e_gw.116.124.1	2.81933	3.45368	3.10127	1.76208	4.51093	3.87658	0.0206863
jgi|Nemve1|90763|e_gw.25.139.1	8.80025	7.74947	8.6689	13.3317	16.484	11.8212	0.0206896
jgi|Nemve1|86507|e_gw.13.362.1	4.44896	7.87684	9.40845	10.0649	8.09564	5.47003	0.0206962
jgi|Nemve1|237719|estExt_fgenesh1_pg.C_10060	8.92423	9.18105	6.48451	10.4651	5.13625	5.26466	0.020697
jgi|Nemve1|214058|fgenesh1_pg.scaffold_191000022	39.2281	34.2845	31.2669	27.9284	26.2591	14.9593	0.0207155
jgi|Nemve1|224137|fgenesh1_pg.scaffold_4010000001	1.90453	1.51049	2.16723	2.82396	1.31347	1.44482	0.020733
jgi|Nemve1|211508|fgenesh1_pg.scaffold_139000025	9.35394	6.93093	5.6349	11.6642	5.7476	6.81823	0.0207479
jgi|Nemve1|173618|estExt_gwp.C_2610015	116.124	149.188	137.712	72.8329	81.2978	84.4793	0.0207812
jgi|Nemve1|244402|estExt_fgenesh1_pg.C_1200033	24.7245	52.4393	23.6305	34.133	39.0925	38.2173	0.0207872
jgi|Nemve1|185620|estExt_GenewiseH_1.C_730180	79.5085	73.8172	78.0997	50.2633	46.0371	38.8245	0.0208097
jgi|Nemve1|124632|e_gw.212.69.1	7.82365	6.13205	9.37428	3.66513	6.69591	5.77963	0.0208125
jgi|Nemve1|219591|fgenesh1_pg.scaffold_422000022	62.0685	55.4855	43.8868	31.6612	79.1007	53.2911	0.020814
jgi|Nemve1|242987|estExt_fgenesh1_pg.C_760077	8.38042	15.8006	13.9674	7.42016	10.5628	9.25338	0.0208387
jgi|Nemve1|110132|e_gw.98.186.1	3.10424	4.43463	3.35765	3.1676	6.46189	3.92782	0.0208438
jgi|Nemve1|201641|fgenesh1_pg.scaffold_29000123	5.25123	5.17829	3.79255	2.11508	4.08429	4.95949	0.0208466
jgi|Nemve1|77672|gw.8209.2.1	0.568119	0.681743	0.454495	1.02261	0.681743	0.511307	0.0208597
jgi|Nemve1|238430|estExt_fgenesh1_pg.C_50231	6.35611	8.41061	14.3815	13.9963	10.1441	12.3912	0.0208729
jgi|Nemve1|222754|fgenesh1_pg.scaffold_1902000002	0.50877	0.50877	0.661401	0.559647	0.407016	0.254385	0.0208751
jgi|Nemve1|246094|estExt_fgenesh1_pg.C_1960032	22.6956	28.4753	27.3475	15.1539	39.1887	25.233	0.0209028
jgi|Nemve1|239501|estExt_fgenesh1_pg.C_150133	63.0475	101.698	94.4428	76.4017	58.4248	45.0706	0.0209034
jgi|Nemve1|165740|estExt_gwp.C_640003	15.7369	26.1335	12.6691	22.3271	16.1346	13.0099	0.020907
jgi|Nemve1|86706|e_gw.14.50.1	90.9559	109.647	92.1489	159.812	89.5356	67.3221	0.020913
jgi|Nemve1|246906|estExt_fgenesh1_pg.C_2520026	5.7491	8.49646	7.27542	13.6859	10.1754	8.34383	0.0209156
jgi|Nemve1|233095|fgsh_est.C_scaffold_132000008	72.4085	50.8268	39.8951	28.4563	51.0522	48.5165	0.0209224
jgi|Nemve1|197800|fgenesh1_pg.scaffold_7000083	3.07942	1.50695	2.55526	3.66909	2.88286	2.0311	0.0209263
jgi|Nemve1|244940|estExt_fgenesh1_pg.C_1390059	9.56626	8.08959	7.57597	13.29	16.3718	11.4282	0.0209578
jgi|Nemve1|105784|e_gw.79.106.1	22.6824	35.4458	24.5787	46.8235	45.9482	31.2156	0.0209608
jgi|Nemve1|118854|e_gw.156.41.1	35.9702	33.7425	17.6903	44.2256	32.2356	24.6353	0.0209684
jgi|Nemve1|202545|fgenesh1_pg.scaffold_36000022	12.2714	20.6227	15.5096	7.84004	13.8621	15.1688	0.0209957
jgi|Nemve1|157742|estExt_gwp.C_10237	11.7423	13.8574	9.55432	5.6159	7.80391	10.2107	0.0209989
jgi|Nemve1|173444|estExt_gwp.C_2520037	4.97587	10.912	6.02342	6.37261	9.51526	8.99149	0.0210033
jgi|Nemve1|238593|estExt_fgenesh1_pg.C_60224	54.56	35.3549	32.5614	42.0767	31.9503	21.9113	0.0210033
jgi|Nemve1|193548|estExt_GenewiseH_1.C_3000027	0.86491	1.06842	0.610524	1.37368	1.3228	0.814033	0.0210191
jgi|Nemve1|189113|estExt_GenewiseH_1.C_1350112	95.906	131.631	110.106	191.305	109.655	85.9323	0.0210274
jgi|Nemve1|87337|e_gw.15.168.1	9.24525	8.73162	7.12655	5.00784	4.49422	5.39306	0.0210364
jgi|Nemve1|89177|e_gw.20.51.1	23.1031	23.5539	17.1865	30.7666	16.9047	13.1857	0.0210502
jgi|Nemve1|232429|fgsh_est.C_scaffold_46000008	28.5764	41.2454	33.6895	45.1087	29.6558	18.1798	0.0210602
jgi|Nemve1|221790|fgenesh1_pg.scaffold_999000002	12.1211	12.9729	6.94506	17.4282	15.0695	10.221	0.0210615
jgi|Nemve1|213449|fgenesh1_pg.scaffold_176000032	3.13615	3.28202	3.35495	6.34523	3.79255	5.17829	0.0210628
jgi|Nemve1|157758|estExt_gwp.C_10271	1.76208	3.66513	3.52417	4.29948	3.24223	2.39643	0.0210787
jgi|Nemve1|238101|estExt_fgenesh1_pg.C_30184	3.94707	2.67837	2.46692	5.42721	4.79286	4.01755	0.0210932
jgi|Nemve1|243341|estExt_fgenesh1_pg.C_850085	12.1341	28.3712	24.7921	31.6011	26.6253	20.6892	0.0210938
jgi|Nemve1|211860|fgenesh1_pg.scaffold_145000022	38.8467	44.6083	31.6011	39.6324	25.4031	18.8559	0.0211014
jgi|Nemve1|212307|fgenesh1_pg.scaffold_153000033	21.6384	30.8717	14.1671	16.9865	21.6384	14.9425	0.0211146
jgi|Nemve1|13474|gw.217.15.1	9.04169	9.50032	6.87954	6.81403	14.8729	10.6142	0.0211287
jgi|Nemve1|248374|estExt_fgenesh1_pg.C_5340005	43.9913	55.172	59.0382	93.9387	61.964	42.7374	0.0211427
jgi|Nemve1|100430|e_gw.57.126.1	19.6385	19.5877	24.014	36.0209	15.3649	21.521	0.0211461
jgi|Nemve1|182323|estExt_GenewiseH_1.C_370020	60.5834	66.7814	67.1306	112.35	71.4954	46.4415	0.0211485
jgi|Nemve1|244592|estExt_fgenesh1_pg.C_1270034	45.5117	48.3357	25.8754	26.3351	30.5382	25.8097	0.021173
jgi|Nemve1|237029|estExt_fgenesh1_kg.C_920006	37.4959	32.4396	38.4617	24.1451	22.6111	17.5549	0.0211816
jgi|Nemve1|240145|estExt_fgenesh1_pg.C_250070	81.2381	70.205	56.7419	91.9429	55.4284	37.8936	0.0212151
jgi|Nemve1|239233|estExt_fgenesh1_pg.C_130051	37.0185	74.037	65.5195	46.1257	83.8649	78.8199	0.0212155
jgi|Nemve1|50175|gw.25.158.1	12.1393	11.8269	7.23001	5.31094	11.5591	9.81854	0.0212542
jgi|Nemve1|161912|estExt_gwp.C_250219	49.9474	35.3184	33.0196	23.4063	25.1827	25.1827	0.0212581
jgi|Nemve1|169723|estExt_gwp.C_1320054	32.966	34.06	32.6743	43.979	58.0552	63.3065	0.0212611
jgi|Nemve1|234576|estExt_fgenesh1_pm.C_410003	36.7516	90.3514	52.1157	77.1697	61.8056	75.511	0.0212782
jgi|Nemve1|164994|estExt_gwp.C_550128	108.525	79.0602	81.3211	43.1038	108.015	77.0909	0.021325
jgi|Nemve1|230118|fgenesh1_pm.scaffold_141000004	3.97071	3.65723	3.23926	3.55274	5.85157	6.58302	0.0213301
jgi|Nemve1|215773|fgenesh1_pg.scaffold_237000034	11.2355	19.3893	8.47481	11.8134	17.8485	15.2803	0.0213349
jgi|Nemve1|99563|e_gw.53.30.1	34.0833	26.6078	42.5725	31.0424	25.0874	16.6616	0.0213484
jgi|Nemve1|206043|fgenesh1_pg.scaffold_65000078	68.2713	48.7465	36.953	33.2839	40.9497	31.7769	0.021359
jgi|Nemve1|196829|fgenesh1_pg.scaffold_3000150	77.6694	68.1667	51.315	75.3888	44.9799	35.0336	0.0213632
jgi|Nemve1|240366|estExt_fgenesh1_pg.C_280016	17.8682	17.5547	9.09084	15.2559	12.9571	8.67287	0.0213928
jgi|Nemve1|244574|estExt_fgenesh1_pg.C_1270009	123.987	137.845	102.326	165.632	231.638	200.859	0.0214164
jgi|Nemve1|118606|e_gw.154.30.1	2.28947	2.59473	0.966664	2.03508	2.34034	2.4421	0.0214277
jgi|Nemve1|239070|estExt_fgenesh1_pg.C_110137	33.026	76.0044	41.0593	67.3462	68.1942	58.8666	0.021431
jgi|Nemve1|82036|e_gw.5.320.1	10.0865	15.2142	8.33965	8.95949	9.35394	16.623	0.0214324
jgi|Nemve1|210694|fgenesh1_pg.scaffold_126000020	86.4394	113.262	94.4973	99.1743	65.6466	45.4173	0.0214358
jgi|Nemve1|118171|e_gw.151.77.1	8.1724	8.1724	5.19486	5.76502	3.99117	4.43463	0.0214385
jgi|Nemve1|158987|estExt_gwp.C_50637	6.63302	12.478	6.10764	7.61813	12.0182	10.3764	0.0214445
jgi|Nemve1|63583|gw.479.34.1	3.60357	2.48974	1.76903	2.22766	2.09662	1.57247	0.0214453
jgi|Nemve1|175458|estExt_gwp.C_3950008	21.7344	31.2432	25.3916	13.584	23.0928	15.2559	0.021449
jgi|Nemve1|220857|fgenesh1_pg.scaffold_592000004	2.40332	5.22462	4.28419	3.03028	3.34376	2.61231	0.0214577
jgi|Nemve1|141782|e_gw.607.11.1	0.19702	0.328367	0.19702	0.262694	0.262694	0.131347	0.0214604
jgi|Nemve1|113433|e_gw.118.134.1	4.99119	7.02706	4.99119	2.56127	6.04196	5.18821	0.0214634
jgi|Nemve1|194229|estExt_GenewiseH_1.C_3510055	23.7764	27.3501	34.5706	24.214	20.3485	13.1281	0.0214664
jgi|Nemve1|236873|estExt_fgenesh1_kg.C_630006	32.2461	36.6808	38.2646	26.0376	40.0384	62.4016	0.0214999
jgi|Nemve1|207162|fgenesh1_pg.scaffold_77000059	176.969	271.05	148.393	114.419	143.677	167.141	0.0215378
jgi|Nemve1|131390|e_gw.294.60.1	1.92051	2.53158	2.2697	2.79347	3.84102	4.19021	0.0215745
jgi|Nemve1|120818|e_gw.174.7.1	2.77148	3.35495	2.47975	1.67748	4.30309	3.35495	0.02158
jgi|Nemve1|97320|e_gw.46.327.1	9.50206	9.05264	9.37365	4.109	9.50206	6.0993	0.0215811
jgi|Nemve1|11446|gw.210.12.1	25.2774	36.6808	14.2542	34.8436	33.8299	31.1058	0.0215865
jgi|Nemve1|160432|estExt_gwp.C_130381	22.7087	35.6689	33.4713	25.6952	37.9792	16.1158	0.0215963
jgi|Nemve1|42247|gw.149.102.1	3.01755	2.50392	1.66928	1.47667	1.73348	1.54087	0.0216102
jgi|Nemve1|170950|estExt_gwp.C_1620118	55.2584	63.9007	52.0284	27.4109	36.2278	38.1483	0.0216119
jgi|Nemve1|235477|estExt_fgenesh1_pm.C_1510005	66.598	94.3769	113.914	149.222	80.1822	77.384	0.0216121
jgi|Nemve1|115316|e_gw.130.131.1	9.0899	9.94208	4.43133	5.05626	7.66961	7.27192	0.0216242
jgi|Nemve1|83078|e_gw.7.155.1	2.31031	5.29681	3.32459	3.60634	4.33887	2.6484	0.0216243
jgi|Nemve1|240406|estExt_fgenesh1_pg.C_280109	78.6537	104.93	90.3514	76.9951	152.593	146.308	0.0216305
jgi|Nemve1|221347|fgenesh1_pg.scaffold_735000001	0.493383	0.63435	0.352417	0.281933	0.63435	0.493383	0.0216552
jgi|Nemve1|239707|estExt_fgenesh1_pg.C_180099	4.36997	6.69591	7.47123	3.8061	8.73993	6.06156	0.0216696
jgi|Nemve1|197092|fgenesh1_pg.scaffold_4000172	5.77963	7.11881	7.11881	2.88982	7.75316	6.7664	0.0216703
jgi|Nemve1|75265|gw.33.373.1	11.0866	12.396	5.84883	7.07098	13.0071	11.8723	0.021678
jgi|Nemve1|59993|gw.49.149.1	243.745	193.056	124.352	110.13	144.701	204.287	0.02168
jgi|Nemve1|245363|estExt_fgenesh1_pg.C_1570020	60.4853	61.6017	56.5449	30.7352	38.9444	33.2308	0.0216839
jgi|Nemve1|238693|estExt_fgenesh1_pg.C_70192	522.02	459.872	520.183	611.916	290.912	283.753	0.0216933
jgi|Nemve1|93239|e_gw.32.143.1	1.21986	0.770437	0.577828	1.21986	0.83464	1.28406	0.0217111
jgi|Nemve1|94229|e_gw.35.237.1	28.8885	23.1234	18.6255	15.9647	37.1876	28.5717	0.0217307
jgi|Nemve1|107943|e_gw.88.57.1	3.27436	3.72378	2.95334	5.45726	4.36581	2.24711	0.0217506
jgi|Nemve1|163440|estExt_gwp.C_400056	201.392	203.574	201.217	140.11	136.356	87.9071	0.0217511
jgi|Nemve1|213959|fgenesh1_pg.scaffold_188000025	3.87658	6.20253	5.63866	2.81933	4.86335	6.83688	0.0217603
jgi|Nemve1|235880|estExt_fgenesh1_pm.C_2660005	6.30612	6.47656	5.16988	5.28351	3.06784	3.23828	0.0217743
jgi|Nemve1|243194|estExt_fgenesh1_pg.C_810050	116.143	102.34	107.99	196.333	189.592	113.575	0.0217819
jgi|Nemve1|136849|e_gw.384.35.1	55.7821	39.1086	34.5692	21.4748	31.3393	40.0689	0.0217923
jgi|Nemve1|205321|fgenesh1_pg.scaffold_58000059	1.57777	1.74682	1.52142	2.14126	0.901584	1.07063	0.0218012
jgi|Nemve1|132153|e_gw.305.17.1	25.6222	19.6569	9.71484	16.5891	17.4413	14.8847	0.0218405
jgi|Nemve1|109357|e_gw.94.120.1	404.945	400.574	297.184	188.345	255.498	224.836	0.0218419
jgi|Nemve1|208994|fgenesh1_pg.scaffold_99000069	2.47975	5.32416	2.55268	2.84442	3.50082	3.06322	0.0218472
jgi|Nemve1|182914|estExt_GenewiseH_1.C_430031	18.4767	20.5297	20.7082	23.2967	33.2938	38.3816	0.0218583
jgi|Nemve1|237881|estExt_fgenesh1_pg.C_20088	29.5933	54.56	37.3627	50.5444	30.9028	25.8396	0.0218645
jgi|Nemve1|236687|estExt_fgenesh1_kg.C_380006	3.86447	4.94145	4.68804	2.15396	5.76502	5.19486	0.0218658
jgi|Nemve1|112357|e_gw.111.18.1	3.91639	6.42031	6.93394	10.4651	8.53901	7.70437	0.0218768
jgi|Nemve1|225988|fgenesh1_pg.scaffold_15813000001	10.0228	9.92102	9.9719	4.07016	6.97015	7.93682	0.0218778
jgi|Nemve1|199361|fgenesh1_pg.scaffold_14000126	18.4195	21.9113	23.5699	13.8801	12.7452	10.912	0.0218793
jgi|Nemve1|205896|fgenesh1_pg.scaffold_64000019	15.6473	19.8058	12.4051	7.6122	11.7002	13.1099	0.0218861
jgi|Nemve1|139976|e_gw.498.29.1	8.2822	10.9145	11.685	19.2609	17.5274	14.3173	0.0218874
jgi|Nemve1|239067|estExt_fgenesh1_pg.C_110132	95.4015	101.776	58.4112	52.0372	111.18	108.881	0.0219144
jgi|Nemve1|112069|e_gw.109.44.1	1.6513	1.78519	2.81167	1.82982	3.34723	3.03482	0.0219461
jgi|Nemve1|89054|e_gw.20.101.1	5.71408	5.45726	6.29191	2.69653	4.1732	3.53117	0.0219691
jgi|Nemve1|218820|fgenesh1_pg.scaffold_369000017	0.937224	1.69593	1.47278	1.29426	1.96371	2.32074	0.0219712
jgi|Nemve1|243055|estExt_fgenesh1_pg.C_780040	60.7545	55.0528	42.6358	44.1563	35.1603	24.3905	0.0219738
jgi|Nemve1|162161|estExt_gwp.C_270351	10.4315	14.59	7.1893	6.3435	12.546	10.7839	0.0219913
jgi|Nemve1|240549|estExt_fgenesh1_pg.C_310023	62.2435	40.0979	57.1985	91.7928	52.8087	43.898	0.0220003
jgi|Nemve1|120549|e_gw.171.51.1	38.2477	46.2364	35.3914	32.0888	18.2982	25.3497	0.0220055
jgi|Nemve1|151776|e_gw.4415.1.1	1.2478	0.656735	1.2478	1.05078	0.656735	0.722408	0.0220148
jgi|Nemve1|95956|e_gw.41.219.1	1.17017	0.763155	1.01754	0.559647	0.559647	0.712278	0.0220154
jgi|Nemve1|194333|estExt_GenewiseH_1.C_3620048	14.0541	15.4333	12.3466	13.8571	26.7291	20.4901	0.0220163
jgi|Nemve1|208440|fgenesh1_pg.scaffold_92000056	24.7048	30.6409	17.8957	41.7275	30.379	20.4273	0.022055
jgi|Nemve1|238123|estExt_fgenesh1_pg.C_30216	35.0549	38.5861	28.5704	47.7671	68.5047	46.9325	0.022058
jgi|Nemve1|221778|fgenesh1_pg.scaffold_982000002	3.20908	5.47003	6.12643	8.53325	7.65804	6.34523	0.02206
jgi|Nemve1|243582|estExt_fgenesh1_pg.C_920048	8.5786	10.9647	12.9531	12.6691	6.64699	6.24931	0.0220829
jgi|Nemve1|239945|estExt_fgenesh1_pg.C_220058	59.0451	69.8009	40.613	50.8779	30.616	36.3286	0.0220883
jgi|Nemve1|114149|e_gw.123.57.1	17.3163	13.4335	13.746	9.37224	10.7558	7.00686	0.0221169
jgi|Nemve1|211238|fgenesh1_pg.scaffold_134000029	45.3359	32.0987	18.0662	38.5185	41.3591	27.2129	0.022117
jgi|Nemve1|165928|estExt_gwp.C_660156	33.6399	44.473	49.2878	40.5452	67.2797	75.1987	0.0221322
jgi|Nemve1|182198|estExt_GenewiseH_1.C_350148	7.47892	11.2947	8.49646	4.17192	7.07191	9.25962	0.0221374
jgi|Nemve1|207738|fgenesh1_pg.scaffold_83000099	6.27184	6.33519	4.94145	9.94625	10.073	10.5798	0.0221509
jgi|Nemve1|159738|estExt_gwp.C_90507	11.7601	19.8842	20.85	24.5996	32.1555	21.8158	0.0221607
jgi|Nemve1|236995|estExt_fgenesh1_kg.C_880001	3.24223	5.42721	3.52417	2.74885	3.17175	2.25547	0.0221991
jgi|Nemve1|247415|estExt_fgenesh1_pg.C_3010007	11.1364	18.5371	22.9776	26.2198	26.8541	28.5457	0.0222055
jgi|Nemve1|232052|fgsh_est.C_scaffold_17000006	9.60121	7.84004	6.36293	10.3398	7.32874	4.03365	0.0222309
jgi|Nemve1|158628|estExt_gwp.C_40407	11.1421	11.2947	18.0613	17.7561	11.1929	8.14033	0.0222563
jgi|Nemve1|241565|estExt_fgenesh1_pg.C_470074	21.521	22.2841	15.314	10.6333	15.8736	11.0403	0.0222594
jgi|Nemve1|228717|fgenesh1_pm.scaffold_32000006	11.6484	7.58705	7.72094	7.49779	6.56057	4.37371	0.0222695
jgi|Nemve1|243998|estExt_fgenesh1_pg.C_1040015	141.953	182.722	146.255	93.4797	97.6529	83.7209	0.0222764
jgi|Nemve1|135379|e_gw.355.1.1	67.3178	64.6922	38.4361	36.9045	43.1768	33.039	0.02228
jgi|Nemve1|90018|e_gw.23.304.1	38.0111	30.9791	27.6848	21.0328	43.1427	50.8082	0.0222802
jgi|Nemve1|125694|e_gw.222.13.1	6.04196	5.97629	5.51657	8.34053	5.38523	2.95531	0.0222868
jgi|Nemve1|244348|estExt_fgenesh1_pg.C_1190005	8.73458	12.0839	11.8212	6.76437	15.7616	15.4333	0.0223191
jgi|Nemve1|234527|estExt_fgenesh1_pm.C_360003	22.8777	30.4848	21.5817	10.65	22.2015	25.188	0.0223342
jgi|Nemve1|241799|estExt_fgenesh1_pg.C_510096	101.601	119.103	81.6068	64.7665	57.1349	58.6103	0.0223418
jgi|Nemve1|214758|fgenesh1_pg.scaffold_209000022	12.6165	6.7664	6.62543	5.4977	8.59896	10.0086	0.0223459
jgi|Nemve1|110754|e_gw.102.143.1	8.11853	6.98368	5.93613	9.34067	14.0547	10.3882	0.0223463
jgi|Nemve1|142315|e_gw.662.1.1	16.0914	14.1275	8.99597	9.8829	10.3264	6.77865	0.02235
jgi|Nemve1|245317|estExt_fgenesh1_pg.C_1540028	86.8332	108.463	112.12	45.9766	78.6828	66.5616	0.022351
jgi|Nemve1|122070|e_gw.186.55.1	2.48974	4.19325	4.19325	1.76903	3.60357	3.07942	0.0223707
jgi|Nemve1|206981|fgenesh1_pg.scaffold_75000075	11.2852	19.1221	15.3604	21.9434	15.8828	9.19533	0.0223768
jgi|Nemve1|240973|estExt_fgenesh1_pg.C_370132	22.0859	20.0781	16.1498	38.6721	27.7601	22.7843	0.0223809
jgi|Nemve1|235730|estExt_fgenesh1_pm.C_2160005	41.2037	62.1547	41.9894	24.3556	37.9738	32.6487	0.0223888
jgi|Nemve1|79420|e_gw.1.232.1	14.7025	11.8134	9.82308	8.218	18.4905	9.63047	0.0224112
jgi|Nemve1|141705|e_gw.597.6.1	0.642031	0.706234	0.577828	0.385219	1.02725	0.706234	0.0224122
jgi|Nemve1|222668|fgenesh1_pg.scaffold_1829000001	0.706234	0.577828	0.898844	0.963047	1.34827	1.21986	0.0224291
jgi|Nemve1|232469|fgsh_est.C_scaffold_49000004	17.1684	28.255	22.1732	12.5437	30.8524	22.87	0.0224477
jgi|Nemve1|107277|e_gw.85.56.1	12.9039	12.0023	4.90236	10.3119	9.63568	8.17061	0.0224582
jgi|Nemve1|248492|estExt_fgenesh1_pg.C_5940003	9.02186	7.89413	9.16283	8.38751	7.11881	3.3832	0.022477
jgi|Nemve1|208419|fgenesh1_pg.scaffold_92000035	0.83464	0.449422	0.385219	0.385219	0.513625	0.577828	0.0224884
jgi|Nemve1|180108|estExt_GenewiseH_1.C_160234	90.2186	85.9896	59.3469	48.2106	55.0475	42.149	0.0225049
jgi|Nemve1|10112|gw.209.7.1	21.3563	16.1722	12.7912	14.9888	27.9491	25.8642	0.0225065
jgi|Nemve1|108213|e_gw.89.96.1	10.1358	4.80665	6.37404	9.09084	5.95607	5.12013	0.0225222
jgi|Nemve1|13456|gw.214.22.1	9.78535	16.5497	20.8842	23.5111	18.3886	12.3466	0.0225534
jgi|Nemve1|221874|fgenesh1_pg.scaffold_1062000001	0.763155	0.966664	0.457893	0.457893	0.763155	0.915787	0.0225659
jgi|Nemve1|201448|fgenesh1_pg.scaffold_28000065	7.79682	11.2038	8.38649	5.24156	7.14162	4.78292	0.0225673
jgi|Nemve1|241800|estExt_fgenesh1_pg.C_510098	117.375	127.461	84.2418	62.9982	63.6744	72.6339	0.0225737
jgi|Nemve1|83746|e_gw.8.29.1	20.2715	38.7667	19.8536	17.4502	21.8389	21.6299	0.022583
jgi|Nemve1|239324|estExt_fgenesh1_pg.C_130210	16.2298	14.8561	17.9596	8.24208	8.90348	11.6	0.0225938
jgi|Nemve1|111422|e_gw.105.53.1	12.2214	17.8084	6.89638	10.5628	15.1022	11.0866	0.0226015
jgi|Nemve1|246817|estExt_fgenesh1_pg.C_2440009	22.87	23.1868	15.3945	18.182	12.9238	10.1997	0.0226049
jgi|Nemve1|203682|fgenesh1_pg.scaffold_44000127	6.76665	7.17366	5.90174	2.84911	5.59647	4.22279	0.0226211
jgi|Nemve1|242105|estExt_fgenesh1_pg.C_570029	18.6998	32.2227	21.8686	16.2898	18.1197	13.5674	0.0226331
jgi|Nemve1|235516|estExt_fgenesh1_pm.C_1610003	32.8908	40.491	34.0046	21.949	56.7399	32.6287	0.0226483
jgi|Nemve1|185723|estExt_GenewiseH_1.C_740213	223.509	228.107	256.529	237.929	156.216	101.358	0.0226598
jgi|Nemve1|151083|e_gw.3888.7.1	35.7347	31.9851	34.5416	31.5874	20.9636	14.8279	0.022672
jgi|Nemve1|244247|estExt_fgenesh1_pg.C_1150028	10.3764	24.6276	17.0751	15.1706	19.9647	12.2809	0.0226813
jgi|Nemve1|132328|e_gw.308.5.1	16.1722	25.8642	13.1857	18.2571	17.5245	10.1992	0.0226903
jgi|Nemve1|88129|e_gw.17.3.1	7.31447	11.5987	7.83693	15.9873	14.6289	10.3447	0.0226921
jgi|Nemve1|169881|estExt_gwp.C_1350074	45.8722	42.1104	18.5996	27.168	40.3341	31.2432	0.0226974
jgi|Nemve1|240985|estExt_fgenesh1_pg.C_380001	5.39297	9.05611	5.59647	4.01929	7.93682	4.78244	0.0226994
jgi|Nemve1|244232|estExt_fgenesh1_pg.C_1140042	32.7472	41.6452	21.8801	31.5074	23.9952	17.2853	0.0227069
jgi|Nemve1|81963|e_gw.5.66.1	12.7764	15.9224	10.9787	17.078	26.0023	20.4808	0.0227325
jgi|Nemve1|232250|fgsh_est.C_scaffold_32000005	4.45157	4.50792	3.88808	7.66347	8.17061	6.64918	0.0227426
jgi|Nemve1|53826|gw.69.185.1	3.08175	6.1635	7.70437	8.1538	6.1635	8.02539	0.0227431
jgi|Nemve1|106520|e_gw.82.8.1	109.68	135.298	66.9609	73.0542	99.262	61.6538	0.0227642
jgi|Nemve1|90329|e_gw.23.15.1	21.1628	32.8908	21.949	12.6453	29.3527	20.9007	0.0227672
jgi|Nemve1|60838|gw.63.174.1	15.6014	14.8309	7.19075	9.43786	16.3718	16.436	0.0227738
jgi|Nemve1|204310|fgenesh1_pg.scaffold_49000119	20.8087	17.807	16.6368	7.78419	15.6192	21.2157	0.0227757
jgi|Nemve1|243403|estExt_fgenesh1_pg.C_880030	9.68465	9.81854	6.56057	9.4615	7.85483	3.88278	0.0227766
jgi|Nemve1|231277|fgenesh1_pm.scaffold_543000002	5.95607	8.15041	3.65723	4.0752	7.73244	6.37404	0.0227819
jgi|Nemve1|238589|estExt_fgenesh1_pg.C_60220	13.6753	22.5353	36.1464	33.6424	27.4147	28.442	0.0227949
jgi|Nemve1|147766|e_gw.2132.2.1	0.291735	0.291735	0.510536	0.437602	0.218801	0.437602	0.0227995
jgi|Nemve1|243825|estExt_fgenesh1_pg.C_990056	29.9554	31.506	24.9511	17.1274	18.6076	14.3786	0.0228087
jgi|Nemve1|20110|gw.111.49.1	33.5495	40.697	26.0373	52.0747	64.6193	46.6046	0.022809
jgi|Nemve1|112507|e_gw.112.29.1	131.681	93.1587	101.248	158.71	74.6682	73.5768	0.022816
jgi|Nemve1|245242|estExt_fgenesh1_pg.C_1510033	18.8047	17.3276	11.5896	7.44236	16.7595	13.0099	0.0228214
jgi|Nemve1|236810|estExt_fgenesh1_kg.C_550001	20.2287	17.5503	25.1625	39.4002	32.9862	21.9203	0.0228379
jgi|Nemve1|240751|estExt_fgenesh1_pg.C_330115	186.599	212.938	196.493	103.848	113.676	118.394	0.0228578
jgi|Nemve1|147404|e_gw.1988.3.1	21.212	33.2286	17.9727	16.4053	19.7491	14.211	0.0228654
jgi|Nemve1|239505|estExt_fgenesh1_pg.C_150140	108.262	130.817	115.663	76.4039	154.852	194.957	0.0228861
jgi|Nemve1|129619|e_gw.267.37.1	7.82365	9.7267	7.47123	3.3832	6.83688	6.48446	0.0229073
jgi|Nemve1|84489|e_gw.9.9.1	35.7041	61.7183	31.6011	24.8794	41.9021	37.45	0.0229176
jgi|Nemve1|216205|fgenesh1_pg.scaffold_252000030	16.7249	22.87	21.6664	31.7393	18.7522	12.417	0.0229208
jgi|Nemve1|201348|fgenesh1_pg.scaffold_27000111	14.6383	19.2609	12.5196	7.96119	11.8776	9.43786	0.0229274
jgi|Nemve1|194470|estExt_GenewiseH_1.C_3770025	30.5607	26.7085	24.333	11.8776	31.5879	21.0586	0.0229332
jgi|Nemve1|101157|e_gw.59.9.1	46.9652	69.7495	24.7048	41.9021	49.4095	49.3222	0.0229446
jgi|Nemve1|103669|e_gw.69.209.1	4.48814	2.8406	1.98842	2.78378	3.86321	4.65858	0.022973
jgi|Nemve1|198875|fgenesh1_pg.scaffold_12000098	1.23968	1.07063	0.676188	0.507141	0.788886	1.01428	0.0229796
jgi|Nemve1|82268|e_gw.5.358.1	44.1249	43.3226	45.3648	21.8801	29.6111	24.1411	0.0229862
jgi|Nemve1|236889|estExt_fgenesh1_kg.C_670004	26.0767	22.6042	23.718	10.221	27.3871	28.501	0.0229879
jgi|Nemve1|114264|e_gw.124.50.1	0.852179	0.681743	0.454495	0.340871	0.511307	0.568119	0.0229894
jgi|Nemve1|93841|e_gw.34.245.1	2.27248	2.44291	1.98842	1.81798	3.74959	3.69277	0.0230129
jgi|Nemve1|247088|estExt_fgenesh1_pg.C_2680029	153.051	178.049	183.843	172.765	108.34	76.0711	0.0230138
jgi|Nemve1|36113|gw.32.164.1	15.7746	13.8107	13.1138	10.7698	25.2774	19.7658	0.0230311
jgi|Nemve1|130720|e_gw.284.5.1	11.1571	12.3404	8.7341	5.5222	14.4253	13.242	0.0230369
jgi|Nemve1|166699|estExt_gwp.C_770051	38.061	57.5144	39.3297	26.9246	31.9994	24.8806	0.0230573
jgi|Nemve1|40331|gw.264.20.1	10.0737	8.34383	8.54734	6.00349	3.81578	6.71577	0.0230593
jgi|Nemve1|207236|fgenesh1_pg.scaffold_78000038	0.940431	2.19434	2.61231	2.08985	1.77637	1.67188	0.0230605
jgi|Nemve1|198805|fgenesh1_pg.scaffold_12000028	2.95334	3.78798	3.14595	1.66928	1.9903	2.0545	0.0230656
jgi|Nemve1|113484|e_gw.118.2.1	386.913	511.922	439.936	426.443	300.56	192.472	0.023076
jgi|Nemve1|164373|estExt_gwp.C_490109	132.722	146.913	156.543	121.129	170.86	274.821	0.0230764
jgi|Nemve1|222891|fgenesh1_pg.scaffold_2042000001	20.5674	14.538	16.1722	8.5087	23.1031	16.623	0.0230974
jgi|Nemve1|164107|estExt_gwp.C_460320	13.1211	19.9495	13.255	7.09612	15.2187	12.2732	0.0231155
jgi|Nemve1|238091|estExt_fgenesh1_pg.C_30163	26.6664	38.1323	36.953	16.2488	43.8325	34.9874	0.0231473
jgi|Nemve1|145429|e_gw.1415.1.1	0.950279	1.33039	1.52045	0.760223	0.886927	0.696871	0.0231602
jgi|Nemve1|116873|e_gw.142.6.1	9.19372	10.0417	12.1393	17.2717	19.4586	18.4321	0.0231768
jgi|Nemve1|202325|fgenesh1_pg.scaffold_34000027	10.0791	10.2201	7.54171	5.0748	4.72238	8.24655	0.0231819
jgi|Nemve1|210131|fgenesh1_pg.scaffold_117000023	4.47718	6.8684	4.01929	4.52806	5.24033	2.49297	0.023192
jgi|Nemve1|202369|fgenesh1_pg.scaffold_34000071	46.0371	50.1506	35.2181	26.8221	24.7936	25.2444	0.0232298
jgi|Nemve1|127411|e_gw.237.83.1	8.75085	6.05437	14.5508	13.8894	9.41225	9.3105	0.0232322
jgi|Nemve1|83462|e_gw.7.46.1	25.296	32.551	24.4614	12.0702	32.9362	24.5898	0.0232366
jgi|Nemve1|238109|estExt_fgenesh1_pg.C_30197	8.74742	8.83668	9.28298	16.7361	16.0667	15.4865	0.0232376
jgi|Nemve1|77160|gw.4918.5.1	4.72849	2.82396	5.51657	4.79417	6.50168	7.61813	0.0232404
jgi|Nemve1|184492|estExt_GenewiseH_1.C_580147	169.905	173.457	173.248	76.8019	133.75	98.3273	0.0232572
jgi|Nemve1|244785|estExt_fgenesh1_pg.C_1330054	60.7857	75.1118	38.3369	32.178	54.8945	41.5949	0.0232734
jgi|Nemve1|246063|estExt_fgenesh1_pg.C_1940043	6.0993	8.73162	12.648	11.4924	15.8582	9.69467	0.0232754
jgi|Nemve1|189707|estExt_GenewiseH_1.C_1490033	15.473	32.6794	20.866	29.1482	22.8563	14.8951	0.0232832
jgi|Nemve1|119820|e_gw.164.27.1	0.624931	0.624931	0.340871	0.397683	0.28406	0.511307	0.0232909
jgi|Nemve1|219610|fgenesh1_pg.scaffold_424000009	76.4173	98.3453	85.5752	76.7226	48.2314	41.5665	0.0233031
jgi|Nemve1|199535|fgenesh1_pg.scaffold_15000127	35.446	41.7359	19.4593	40.2945	56.2812	43.3739	0.0233043
jgi|Nemve1|11315|gw.228.5.1	0.28406	0.28406	0.113624	0.170436	0.227248	0.227248	0.0233185
jgi|Nemve1|171362|estExt_gwp.C_1740010	70.0686	47.1736	35.4806	28.6523	52.3953	59.7146	0.02334
jgi|Nemve1|243132|estExt_fgenesh1_pg.C_800007	19.0689	28.6351	14.6343	15.838	32.1194	25.024	0.0233725
jgi|Nemve1|84004|e_gw.8.160.1	0.443463	0.253408	0.443463	0.253408	0.380111	0.570167	0.0233775
jgi|Nemve1|182679|estExt_GenewiseH_1.C_400062	19.9438	15.0087	15.1105	20.8596	11.8035	8.44559	0.0233872
jgi|Nemve1|216927|fgenesh1_pg.scaffold_278000010	38.1379	19.6391	22.6166	27.4947	33.0063	16.2181	0.0234059
jgi|Nemve1|244373|estExt_fgenesh1_pg.C_1190055	18.8696	16.3143	14.0867	10.5486	12.5142	7.27266	0.0234107
jgi|Nemve1|158241|estExt_gwp.C_30137	5.49965	4.97587	4.01562	6.72179	9.77715	7.50746	0.0234189
jgi|Nemve1|182498|estExt_GenewiseH_1.C_380207	8.98844	6.42031	3.98059	7.06234	10.0157	5.64987	0.0234288
jgi|Nemve1|236730|estExt_fgenesh1_kg.C_450002	80.0805	83.7436	72.9068	30.9841	87.3559	68.3787	0.0234375
jgi|Nemve1|40628|gw.25.148.1	12.4963	19.2354	8.61353	10.0417	18.6552	15.3973	0.0234634
jgi|Nemve1|163210|estExt_gwp.C_380071	19.2419	38.1315	41.9376	30.8012	43.2063	52.8625	0.0234739
jgi|Nemve1|112369|e_gw.111.133.1	1.05725	0.916283	1.90305	1.48015	1.48015	0.8458	0.0234835
jgi|Nemve1|60020|gw.4.428.1	5.31955	9.98237	5.38523	8.60323	11.7556	7.35543	0.0234872
jgi|Nemve1|168885|estExt_gwp.C_1160043	132.287	143.05	103.238	61.964	144.931	82.4445	0.0234874
jgi|Nemve1|242776|estExt_fgenesh1_pg.C_710087	9.61576	14.3982	9.15787	15.6701	9.3105	6.66489	0.0235024
jgi|Nemve1|242949|estExt_fgenesh1_pg.C_750084	155.212	183.06	192.4	184.195	112.175	79.0029	0.0235136
jgi|Nemve1|183877|estExt_GenewiseH_1.C_520174	21.6214	19.7214	20.2455	10.4831	29.8114	25.4871	0.023534
jgi|Nemve1|96717|e_gw.43.89.1	2.79347	4.88858	5.49965	7.76934	4.4521	5.15046	0.0235465
jgi|Nemve1|230057|fgenesh1_pm.scaffold_134000004	41.98	34.7673	24.8499	17.0174	42.4308	32.6261	0.0235543
jgi|Nemve1|163137|estExt_gwp.C_370090	71.7863	85.3703	50.8878	48.171	34.4825	51.2013	0.0235712
jgi|Nemve1|168451|estExt_gwp.C_1050019	23.1929	36.6857	18.4522	14.6597	21.0049	25.8185	0.0235795
jgi|Nemve1|107042|e_gw.85.19.1	44.4896	71.7668	37.5609	87.0099	82.9256	70.454	0.0235872
jgi|Nemve1|148988|e_gw.2749.1.1	0.225396	0.112698	0.225396	0.112698	0.169047	0.225396	0.0235889
jgi|Nemve1|118756|e_gw.156.42.1	14.8403	13.3563	8.46771	22.2605	14.5784	11.6104	0.0235965
jgi|Nemve1|204844|fgenesh1_pg.scaffold_54000041	7.47892	7.22454	10.6333	13.1263	7.27542	5.5456	0.0235982
jgi|Nemve1|243640|estExt_fgenesh1_pg.C_930071	6.48451	4.23741	2.37552	5.58567	6.03509	4.87944	0.0235985
jgi|Nemve1|100273|e_gw.56.26.1	20.7221	19.7353	12.4755	7.96461	15.9997	14.9425	0.023618
jgi|Nemve1|244762|estExt_fgenesh1_pg.C_1330014	117.5	117.85	134.698	89.7403	62.6785	62.7658	0.0236338
jgi|Nemve1|178116|estExt_GenewiseH_1.C_50407	45.7126	52.5181	75.1818	104.073	71.5865	51.1057	0.0236369
jgi|Nemve1|238120|estExt_fgenesh1_pg.C_30212	219.02	391.144	274.012	171.613	363.429	388.518	0.0236448
jgi|Nemve1|199338|fgenesh1_pg.scaffold_14000103	19.1325	17.078	10.6577	8.86003	19.903	12.648	0.0236457
jgi|Nemve1|244617|estExt_fgenesh1_pg.C_1280027	7.1475	4.66776	3.20908	4.08429	5.98057	7.43924	0.0236509
jgi|Nemve1|102277|e_gw.64.41.1	22.8663	25.225	22.1456	20.7042	15.4626	9.4348	0.023665
jgi|Nemve1|177723|estExt_GenewiseH_1.C_40050	34.7413	61.5361	70.4677	37.3025	41.8997	35.004	0.023682
jgi|Nemve1|137140|e_gw.390.39.1	27.3236	29.0696	23.5699	16.1498	16.8481	12.7452	0.0237191
jgi|Nemve1|242633|estExt_fgenesh1_pg.C_670104	14.7765	30.1441	32.7711	44.1983	32.5741	34.807	0.0237392
jgi|Nemve1|140461|e_gw.525.3.1	21.134	37.6095	29.9967	39.4275	44.6542	56.187	0.0237394
jgi|Nemve1|30362|gw.7.18.1	56.7998	47.784	32.1189	83.3402	54.4332	73.8172	0.0237708
jgi|Nemve1|236477|estExt_fgenesh1_kg.C_130025	52.3806	38.4048	55.7893	95.5576	71.6966	52.1533	0.0237757
jgi|Nemve1|92368|e_gw.30.99.1	4.97948	7.27266	7.7313	12.5797	10.6797	7.46922	0.0237857
jgi|Nemve1|183679|estExt_GenewiseH_1.C_500179	43.2694	71.651	57.1434	28.6984	72.2845	51.8219	0.0237887
jgi|Nemve1|134436|e_gw.338.15.1	16.5636	18.6076	26.8541	29.744	18.5371	36.6513	0.02379
jgi|Nemve1|248469|estExt_fgenesh1_pg.C_5770002	6.42668	6.20353	4.68612	2.72241	7.00686	4.28445	0.0238
jgi|Nemve1|238903|estExt_fgenesh1_pg.C_90149	8.71409	11.4004	9.36928	3.93117	9.63136	7.53474	0.0238011
jgi|Nemve1|247829|estExt_fgenesh1_pg.C_3560013	24.5736	21.4192	25.642	17.5017	41.77	34.4946	0.0238055
jgi|Nemve1|113517|e_gw.118.11.1	12.7763	15.135	6.48643	14.7419	19.1972	15.3971	0.0238156
jgi|Nemve1|113129|e_gw.116.122.1	5.71359	5.91061	8.01217	10.3107	12.4123	6.76437	0.0238197
jgi|Nemve1|240103|estExt_fgenesh1_pg.C_240125	5.99108	9.58573	3.73562	7.1893	7.82365	5.0748	0.0238349
jgi|Nemve1|234654|estExt_fgenesh1_pm.C_470020	11.4389	11.3262	17.0738	20.1729	22.6523	24.5682	0.0238355
jgi|Nemve1|99390|e_gw.53.170.1	47.6406	45.7401	57.8403	77.2893	49.3511	27.7481	0.0238603
jgi|Nemve1|223041|fgenesh1_pg.scaffold_2198000002	0.770437	0.706234	1.54087	1.54087	1.21986	1.09145	0.0238728
jgi|Nemve1|191126|estExt_GenewiseH_1.C_1940013	61.5066	46.8683	55.9209	60.5435	69.1468	111.778	0.0238729
jgi|Nemve1|133819|e_gw.322.48.1	163.855	104.581	94.1051	122.214	90.4386	62.1547	0.0238735
jgi|Nemve1|173044|estExt_gwp.C_2330405	16.3618	18.3502	10.7374	11.3624	25.4517	18.0662	0.0238745
jgi|Nemve1|120285|e_gw.169.25.1	3.87474	2.95531	3.34935	3.34935	6.17331	5.84494	0.0238756
jgi|Nemve1|221885|fgenesh1_pg.scaffold_1070000003	0.291735	0.145867	0.218801	0.145867	0.145867	0.145867	0.0238808
jgi|Nemve1|96798|e_gw.44.283.1	2.96806	3.05536	4.19021	3.92832	5.84883	6.37261	0.0238976
jgi|Nemve1|232143|fgsh_est.C_scaffold_24000008	4.00608	4.85984	4.13743	4.92551	8.86592	4.85984	0.0239283
jgi|Nemve1|178089|estExt_GenewiseH_1.C_50347	53.857	70.0403	54.1191	32.6287	38.9841	31.3183	0.0239325
jgi|Nemve1|185304|estExt_GenewiseH_1.C_690048	47.6636	54.1235	26.7126	34.4819	32.2995	24.0937	0.023939
jgi|Nemve1|247781|estExt_fgenesh1_pg.C_3510007	14.4143	31.1873	19.9834	27.9113	22.0801	14.2177	0.0239545
jgi|Nemve1|231022|fgenesh1_pm.scaffold_347000001	57.1408	40.1911	37.0452	71.2655	61.956	87.1236	0.0239573
jgi|Nemve1|221452|fgenesh1_pg.scaffold_772000001	31.7262	30.4134	13.4198	22.1719	35.8105	33.2578	0.0239706
jgi|Nemve1|222248|fgenesh1_pg.scaffold_1481000001	5.63467	6.87954	7.01058	2.62078	4.84844	4.7174	0.0239743
jgi|Nemve1|171629|estExt_gwp.C_1830029	103.344	205.449	187.022	96.864	196.376	132.758	0.0239966
jgi|Nemve1|161846|estExt_gwp.C_250071	79.2532	107.825	89.0728	37.1876	101.11	87.3623	0.0240145
jgi|Nemve1|19046|gw.836.5.1	10.6806	13.4076	5.11307	7.78323	12.2714	11.5328	0.0240281
jgi|Nemve1|232575|fgsh_est.C_scaffold_59000004	152.857	124.618	139.163	249.891	112.759	119.704	0.0240314
jgi|Nemve1|245550|estExt_fgenesh1_pg.C_1660033	27.3047	35.5404	25.4041	20.526	19.3223	13.5573	0.024054
jgi|Nemve1|160622|estExt_gwp.C_140309	38.9209	35.8683	32.4087	14.907	33.8841	44.3648	0.024061
jgi|Nemve1|226878|fgenesh1_kg.scaffold_80000003	17.4094	25.515	12.7575	10.643	18.1142	13.1804	0.0240622
jgi|Nemve1|205666|fgenesh1_pg.scaffold_61000098	6.63302	7.74947	7.09274	12.0839	7.48678	4.4658	0.0240761
jgi|Nemve1|91483|e_gw.27.100.1	4.15852	3.24223	7.82365	4.08803	4.229	5.28625	0.0240822
jgi|Nemve1|122725|e_gw.192.50.1	2.02726	4.18123	2.28067	1.90056	2.28067	3.23095	0.0240946
jgi|Nemve1|239440|estExt_fgenesh1_pg.C_150013	6.02779	6.02779	3.73461	2.55526	3.53805	4.65188	0.0240961
jgi|Nemve1|200470|fgenesh1_pg.scaffold_21000155	4.51093	4.93383	4.86335	7.33026	5.70915	2.5374	0.0241005
jgi|Nemve1|248822|estExt_fgenesh1_pg.C_32700001	9.29982	7.00099	11.8076	18.4952	12.8526	12.1211	0.0241127
jgi|Nemve1|159077|estExt_gwp.C_60216	49.2438	50.9773	46.0336	45.2632	91.1042	80.9601	0.0241245
jgi|Nemve1|113531|e_gw.118.19.1	6.80553	7.57597	6.29191	4.0448	10.6577	9.56626	0.0241287
jgi|Nemve1|79980|e_gw.2.429.1	50.9603	53.1191	47.4379	18.8047	42.2681	38.2344	0.0241325
jgi|Nemve1|240536|estExt_fgenesh1_pg.C_310003	203.05	247.873	157.312	153.903	111.522	110.658	0.0241328
jgi|Nemve1|173323|estExt_gwp.C_2450065	27.5754	51.9455	54.5402	72.6015	73.2121	48.1806	0.0241502
jgi|Nemve1|237431|estExt_fgenesh1_kg.C_2390001	17.9526	25.9062	20.85	10.3398	16.4755	12.7827	0.0241526
jgi|Nemve1|237962|estExt_fgenesh1_pg.C_20233	122.903	138.551	101.87	79.6967	68.6735	61.5147	0.0241562
jgi|Nemve1|243639|estExt_fgenesh1_pg.C_930070	4.25877	4.3898	2.94838	2.88286	6.42091	5.70019	0.0241795
jgi|Nemve1|205199|fgenesh1_pg.scaffold_57000051	117.093	146.507	127.631	76.2966	70.2672	72.4648	0.0241855
jgi|Nemve1|238678|estExt_fgenesh1_pg.C_70164	10.6333	14.6017	16.128	15.4157	21.2157	26.914	0.0241969
jgi|Nemve1|147994|e_gw.2226.1.1	4.2031	3.61204	2.16723	1.64184	3.218	3.08665	0.024224
jgi|Nemve1|162107|estExt_gwp.C_270038	27.6848	31.1691	21.7931	13.0505	31.0424	17.7385	0.0242324
jgi|Nemve1|163622|estExt_gwp.C_420122	6.6345	5.76154	2.53158	6.89638	7.42016	6.11072	0.0242527
jgi|Nemve1|228729|fgenesh1_pm.scaffold_32000018	11.0912	10.7351	9.46313	13.3298	19.842	19.5877	0.0242724
jgi|Nemve1|184113|estExt_GenewiseH_1.C_540122	312.397	378.309	388.662	219.818	537.849	541.125	0.0242752
jgi|Nemve1|248175|estExt_fgenesh1_pg.C_4440004	50.8082	67.6598	56.89	86.9822	118.531	96.485	0.0243162
jgi|Nemve1|241009|estExt_fgenesh1_pg.C_380053	19.9035	24.2683	20.5146	10.1263	14.9276	12.2214	0.0243589
jgi|Nemve1|120114|e_gw.167.46.1	6.24816	5.17705	3.03482	2.49926	4.64149	4.64149	0.0243604
jgi|Nemve1|215593|fgenesh1_pg.scaffold_232000007	64.6887	52.799	36.7959	35.7816	74.268	37.0777	0.0243794
jgi|Nemve1|240761|estExt_fgenesh1_pg.C_330135	37.7119	29.506	21.9113	13.1817	25.7523	27.9347	0.0243799
jgi|Nemve1|108425|e_gw.90.28.1	12.2529	13.1281	13.1281	24.2869	12.3987	10.7213	0.0243808
jgi|Nemve1|148411|e_gw.2396.2.1	0.0704833	0.140967	0.0704833	0.140967	0.140967	0.140967	0.024385
jgi|Nemve1|238791|estExt_fgenesh1_pg.C_80173	0.050877	0.101754	0.101754	0.050877	0.101754	0.101754	0.024385
jgi|Nemve1|81756|e_gw.4.250.1	0.145867	0.145867	0.145867	0.145867	0.0729337	0.0729337	0.024385
jgi|Nemve1|171367|estExt_gwp.C_1740024	24.5996	34.3144	36.3596	45.0518	57.2096	59.8229	0.0243948
jgi|Nemve1|187301|estExt_GenewiseH_1.C_980196	30.401	27.2561	29.6148	57.5916	53.3984	41.2117	0.0244116
jgi|Nemve1|228395|fgenesh1_pm.scaffold_16000018	101.933	84.3214	69.3703	77.4794	44.8532	44.8532	0.0244129
jgi|Nemve1|175505|estExt_gwp.C_4080011	42.9784	36.0162	36.6856	29.5895	19.1461	19.5032	0.0244225
jgi|Nemve1|242093|estExt_fgenesh1_pg.C_560098	63.3043	51.5551	55.4073	47.8313	27.3505	29.405	0.0244376
jgi|Nemve1|88487|e_gw.18.191.1	5.0748	3.8061	2.32595	5.77963	5.00431	3.10127	0.0244667
jgi|Nemve1|217639|fgenesh1_pg.scaffold_305000019	17.8652	29.0152	19.5757	36.4273	40.7353	35.9839	0.0245112
jgi|Nemve1|237736|estExt_fgenesh1_pg.C_10091	5.44384	5.85086	10.5824	9.71751	8.95436	4.93507	0.0245195
jgi|Nemve1|158243|estExt_gwp.C_30148	44.4093	80.3546	31.2432	45.1407	44.3048	45.7677	0.0245201
jgi|Nemve1|239385|estExt_fgenesh1_pg.C_140075	432.29	461.796	474.454	227.231	274.284	252.984	0.0245347
jgi|Nemve1|106390|e_gw.81.25.1	127.889	82.9312	68.9638	65.5593	56.8297	60.4961	0.0245695
jgi|Nemve1|218021|fgenesh1_pg.scaffold_323000010	3.53117	2.18291	1.9903	4.1732	4.1732	4.43001	0.0245852
jgi|Nemve1|161245|estExt_gwp.C_190248	15.8828	11.9121	15.0469	25.0782	11.9121	11.2852	0.0246065
jgi|Nemve1|171208|estExt_gwp.C_1710025	100.126	91.3243	86.491	42.1771	49.9612	73.0085	0.024643
jgi|Nemve1|24973|gw.145.33.1	3.8064	4.99945	6.47656	2.32929	3.86321	4.09046	0.024656
jgi|Nemve1|114|gw.352.3.1	14.46	14.1922	11.4698	26.6439	17.361	12.6302	0.0246582
jgi|Nemve1|120214|e_gw.168.49.1	10.4315	11.9117	7.04833	4.79286	10.4315	12.2641	0.024679
jgi|Nemve1|104309|e_gw.72.114.1	6.25474	6.81823	4.73332	9.80473	11.7206	9.57933	0.0246901
jgi|Nemve1|237481|estExt_fgenesh1_kg.C_2730003	74.5713	93.6018	97.6194	84.6505	50.5365	40.9508	0.0246949
jgi|Nemve1|91326|e_gw.27.25.1	136.356	147.879	109.644	94.5416	56.7424	85.6374	0.0247003
jgi|Nemve1|140378|e_gw.519.19.1	2.1824	2.79347	1.48403	1.74592	1.74592	1.04755	0.0247093
jgi|Nemve1|229259|fgenesh1_pm.scaffold_63000016	34.0525	30.8391	27.7597	27.3134	23.9215	11.4698	0.02471
jgi|Nemve1|43312|gw.594.18.1	3.99117	5.0048	6.01843	4.43463	9.50279	5.89173	0.0247157
jgi|Nemve1|218952|fgenesh1_pg.scaffold_377000001	5.42721	5.00431	4.72238	2.67837	3.94707	2.32595	0.0247182
jgi|Nemve1|131672|e_gw.299.34.1	1.83322	2.96806	2.0951	4.4521	2.53158	2.53158	0.0247305
jgi|Nemve1|214007|fgenesh1_pg.scaffold_190000005	11.5515	25.0753	13.5801	11.1571	16.3412	13.1293	0.0247391
jgi|Nemve1|115118|e_gw.130.142.1	7.63155	9.41225	4.47718	4.47718	7.02103	4.62981	0.0247398
jgi|Nemve1|217989|fgenesh1_pg.scaffold_321000014	8.86927	6.5886	6.5886	13.5573	13.9374	10.5164	0.0247441
jgi|Nemve1|32586|gw.3.145.1	15.3973	9.41687	8.65816	5.57871	8.83668	10.5772	0.0247467
jgi|Nemve1|179130|estExt_GenewiseH_1.C_110010	107.829	135.496	116.067	53.1191	80.8433	74.2532	0.0247607
jgi|Nemve1|199788|fgenesh1_pg.scaffold_17000077	34.8623	40.1135	21.1508	15.9725	36.0293	29.5382	0.0247786
jgi|Nemve1|20498|gw.132.20.1	55.8225	72.7662	69.6139	31.8516	40.6519	40.3235	0.0247825
jgi|Nemve1|101531|e_gw.61.256.1	31.2669	26.0023	26.4517	10.6577	25.1676	20.0314	0.0248061
jgi|Nemve1|56163|gw.41.176.1	0.570167	0.380111	0.633519	0.633519	0.31676	0.31676	0.0248176
jgi|Nemve1|236681|estExt_fgenesh1_kg.C_370013	135.028	213.938	210.987	178.985	124.343	88.119	0.0248261
jgi|Nemve1|237418|estExt_fgenesh1_kg.C_2300003	138.348	103.761	98.7453	50.6788	141.901	123.614	0.0248324
jgi|Nemve1|15979|gw.298.3.1	9.24525	11.9418	5.26466	14.1889	13.3542	13.8679	0.0248446
jgi|Nemve1|238702|estExt_fgenesh1_pg.C_70211	30.3783	43.9111	41.5147	17.8323	24.5282	27.277	0.0248642
jgi|Nemve1|240124|estExt_fgenesh1_pg.C_250027	10.9079	14.3166	11.7033	8.97628	21.134	18.4639	0.0248656
jgi|Nemve1|213283|fgenesh1_pg.scaffold_173000019	23.743	20.976	38.2477	27.001	17.4948	16.1113	0.0248744
jgi|Nemve1|99870|e_gw.54.7.1	17.6338	24.4429	12.1341	27.3236	32.8233	21.9986	0.0248757
jgi|Nemve1|82333|e_gw.5.359.1	243.119	126.666	107.636	117.5	126.492	136.269	0.0248816
jgi|Nemve1|212101|fgenesh1_pg.scaffold_149000046	4.3177	7.49917	4.20408	6.7038	9.94208	7.44236	0.0248932
jgi|Nemve1|232392|fgsh_est.C_scaffold_43000016	13.6182	25.4904	19.1178	9.51526	15.8879	14.9276	0.0248967
jgi|Nemve1|243463|estExt_fgenesh1_pg.C_890035	21.0812	18.1259	19.1767	34.6099	28.765	39.5354	0.0248995
jgi|Nemve1|134104|e_gw.329.36.1	8.98634	10.5537	7.10548	7.52345	13.166	16.1963	0.0249253
jgi|Nemve1|216404|fgenesh1_pg.scaffold_259000028	24.1737	28.907	28.0618	36.2888	56.7998	30.4848	0.0249323
jgi|Nemve1|230324|fgenesh1_pm.scaffold_169000005	7.12655	13.8679	12.1344	6.61292	10.4009	6.67712	0.0249444
jgi|Nemve1|102934|e_gw.66.41.1	29.3052	21.0122	28.4911	54.6928	36.7332	33.4771	0.0249471
jgi|Nemve1|134890|e_gw.347.28.1	45.7981	36.5599	29.1562	26.6009	26.9285	16.7075	0.0249534
jgi|Nemve1|179073|estExt_GenewiseH_1.C_100248	166.038	130.198	108.254	64.1583	176.592	127.272	0.0249575
jgi|Nemve1|238129|estExt_fgenesh1_pg.C_30228	33.4935	39.3384	42.4908	77.4947	67.775	57.924	0.0249659
jgi|Nemve1|244984|estExt_fgenesh1_pg.C_1410024	40.1269	86.5458	56.4987	37.6872	47.8313	45.0706	0.0249663
jgi|Nemve1|223497|fgenesh1_pg.scaffold_2888000001	5.7491	3.96841	2.13684	4.22279	5.79998	5.34209	0.024969
jgi|Nemve1|246414|estExt_fgenesh1_pg.C_2160044	54.7607	54.8945	46.638	22.895	35.8377	31.0176	0.0249896
jgi|Nemve1|172778|estExt_gwp.C_2230079	3.97683	6.07887	3.86321	2.15885	4.60176	3.3519	0.0249937
jgi|Nemve1|111122|e_gw.104.4.1	11.7376	16.9593	12.2285	19.8602	11.1574	7.72094	0.0249984
jgi|Nemve1|198950|fgenesh1_pg.scaffold_12000173	33.751	31.7657	18.4952	18.0772	27.377	42.1104	0.0250083
jgi|Nemve1|239865|estExt_fgenesh1_pg.C_210020	18.671	21.9531	27.6419	44.1978	35.1541	23.4117	0.0250099
jgi|Nemve1|164983|estExt_gwp.C_550117	9.9989	10.1125	6.93105	4.03365	6.98786	10.4534	0.0250115
jgi|Nemve1|163262|estExt_gwp.C_380208	12.5409	15.0402	16.9147	28.0275	24.1893	14.1476	0.0250166
jgi|Nemve1|162587|estExt_gwp.C_320123	40.36	43.1773	25.225	19.4593	26.6009	22.2766	0.025039
jgi|Nemve1|161947|estExt_gwp.C_260045	11.8715	10.1756	6.91761	6.29279	15.0848	12.4071	0.0250444
jgi|Nemve1|81294|e_gw.4.29.1	72.014	69.0839	34.711	67.1117	105.091	79.5648	0.025068
jgi|Nemve1|129741|e_gw.269.46.1	22.9883	15.0469	15.8828	23.8243	33.3331	32.3926	0.0250823
jgi|Nemve1|214165|fgenesh1_pg.scaffold_193000030	11.7002	9.65621	7.25978	8.8809	6.69591	4.229	0.0250866
jgi|Nemve1|218869|fgenesh1_pg.scaffold_373000004	780.558	964.047	919.219	662.273	486.621	407.416	0.0250871
jgi|Nemve1|140375|e_gw.519.7.1	23.8836	26.0023	18.5547	11.1071	24.333	32.1658	0.0251056
jgi|Nemve1|206160|fgenesh1_pg.scaffold_67000005	40.7531	38.3289	26.0767	21.6869	19.6558	20.7042	0.0251079
jgi|Nemve1|175766|estExt_gwp.C_4650019	15.2559	22.0479	14.002	8.98634	14.1065	9.71779	0.0251082
jgi|Nemve1|99994|e_gw.55.12.1	28.1079	32.3011	19.6558	31.7769	53.3329	31.7769	0.0251118
jgi|Nemve1|80056|e_gw.2.22.1	81.6022	61.3782	41.8604	57.6544	40.7048	33.7708	0.0251154
jgi|Nemve1|30158|gw.171.47.1	71.4162	65.7816	43.898	32.4321	43.1773	34.9219	0.0251455
jgi|Nemve1|234942|estExt_fgenesh1_pm.C_750012	25.941	31.6546	26.6634	12.1496	20.0304	16.9438	0.0251505
jgi|Nemve1|241781|estExt_fgenesh1_pg.C_510065	193.361	207.066	165.251	150.498	121.953	75.9475	0.0251789
jgi|Nemve1|93024|e_gw.32.116.1	2.00781	2.44429	2.53158	4.71398	4.10291	3.49184	0.0251827
jgi|Nemve1|246104|estExt_fgenesh1_pg.C_1970012	43.1475	62.1928	35.595	21.4096	44.0669	38.1563	0.0251887
jgi|Nemve1|215952|fgenesh1_pg.scaffold_244000004	1.23968	1.12698	0.732537	0.901584	1.46507	1.85952	0.0251916
jgi|Nemve1|194639|estExt_GenewiseH_1.C_3910014	8.86927	16.2814	12.9871	8.67921	20.2093	15.2678	0.025194
jgi|Nemve1|207189|fgenesh1_pg.scaffold_77000086	4.52189	7.07457	5.25123	5.68883	8.75205	10.6483	0.025214
jgi|Nemve1|222487|fgenesh1_pg.scaffold_1660000001	16.0914	11.2766	7.66558	9.43943	18.4354	15.7113	0.0252216
jgi|Nemve1|239037|estExt_fgenesh1_pg.C_110067	1.29426	1.205	2.0976	2.63315	2.27612	1.38352	0.0252243
jgi|Nemve1|40804|gw.390.36.1	22.2111	20.4421	18.2799	24.0456	11.859	10.0245	0.0252291
jgi|Nemve1|179729|estExt_GenewiseH_1.C_140002	14.3786	32.0699	28.5457	37.2857	42.8539	29.462	0.0252375
jgi|Nemve1|160811|estExt_gwp.C_160066	486.621	540.121	541.166	270.635	252.349	354.438	0.0252376
jgi|Nemve1|107214|e_gw.85.121.1	28.3174	47.0216	26.8545	28.3174	56.8439	47.962	0.0252901
jgi|Nemve1|189239|estExt_GenewiseH_1.C_1380074	21.8771	16.8403	16.4842	7.88594	23.1999	18.6719	0.0252952
jgi|Nemve1|88115|e_gw.17.25.1	22.8716	17.5465	17.11	15.4514	10.912	8.8169	0.0253067
jgi|Nemve1|172080|estExt_gwp.C_2000072	26.8545	15.8828	10.2403	17.0323	14.6289	22.3614	0.0253078
jgi|Nemve1|114665|e_gw.127.98.1	3.54771	4.11787	6.14514	2.28067	5.63832	4.81475	0.0253244
jgi|Nemve1|214831|fgenesh1_pg.scaffold_211000016	10.9789	9.86317	13.2104	23.2521	13.4782	11.9608	0.0253517
jgi|Nemve1|240522|estExt_fgenesh1_pg.C_300165	28.2129	43.3643	30.1983	19.8536	46.9171	24.4512	0.0253659
jgi|Nemve1|240064|estExt_fgenesh1_pg.C_240037	11.2852	9.29982	5.12013	10.8672	15.3604	12.2256	0.0253659
jgi|Nemve1|238060|estExt_fgenesh1_pg.C_30102	7.61813	15.1706	9.78535	5.58225	11.3615	10.5078	0.0253694
jgi|Nemve1|137654|e_gw.408.22.1	2.4421	3.20525	1.47543	1.83157	3.71402	2.54385	0.0253885
jgi|Nemve1|165958|estExt_gwp.C_670019	24.9629	19.3282	17.0351	28.6975	16.9695	10.6142	0.0254231
jgi|Nemve1|239681|estExt_fgenesh1_pg.C_180048	5.98038	5.44482	4.86464	11.5591	8.34576	8.2565	0.0254511
jgi|Nemve1|240214|estExt_fgenesh1_pg.C_260037	41.791	61.4102	50.0325	22.026	47.2611	33.2578	0.0254642
jgi|Nemve1|246345|estExt_fgenesh1_pg.C_2120035	5.46585	7.88886	4.50792	5.91665	8.95949	10.9317	0.0254714
jgi|Nemve1|121512|e_gw.180.10.1	33.8736	31.2528	27.0595	36.4943	19.4593	14.2832	0.0254916
jgi|Nemve1|248588|estExt_fgenesh1_pg.C_7080002	201.357	166.665	174.502	201.879	102.925	85.9972	0.025517
jgi|Nemve1|238260|estExt_fgenesh1_pg.C_40194	13.7928	18.4195	20.6892	16.4989	29.506	11.785	0.0255272
jgi|Nemve1|105071|e_gw.75.117.1	2.21732	1.07698	1.20369	0.886927	1.52045	1.26704	0.0255349
jgi|Nemve1|244186|estExt_fgenesh1_pg.C_1120050	47.4799	35.8834	31.6532	26.9855	64.5463	54.1168	0.0255351
jgi|Nemve1|197924|fgenesh1_pg.scaffold_7000207	3.80013	2.62078	1.90006	1.44143	3.0139	3.07942	0.0255363
jgi|Nemve1|162970|estExt_gwp.C_350222	24.3649	30.6695	19.308	47.7446	37.9593	25.2843	0.0255498
jgi|Nemve1|83493|e_gw.7.89.1	8.99149	11.2612	5.84883	6.37261	13.3563	12.4833	0.025554
jgi|Nemve1|191733|estExt_GenewiseH_1.C_2160020	25.2285	42.6877	45.2193	65.1228	34.4819	32.6487	0.0255569
jgi|Nemve1|30104|gw.14.7.1	563.267	435.779	291.954	305.009	242.067	286.411	0.0255659
jgi|Nemve1|226102|fgenesh1_pg.scaffold_18567000001	2.70618	5.32506	3.31725	3.14266	2.00781	2.96806	0.0255969
jgi|Nemve1|246044|estExt_fgenesh1_pg.C_1930018	67.7879	60.1808	65.703	37.3031	27.8364	44.9102	0.0256036
jgi|Nemve1|126388|e_gw.231.36.1	8.58305	5.76571	6.55195	9.4348	13.7591	6.81403	0.0256112
jgi|Nemve1|30165|gw.79.103.1	105.871	110.044	64.6525	52.5823	59.7731	59.0669	0.0256238
jgi|Nemve1|240077|estExt_fgenesh1_pg.C_240065	2.44291	5.68119	6.98786	5.34032	6.81743	6.98786	0.0256283
jgi|Nemve1|50018|gw.220.40.1	14.0762	16.6289	9.91899	23.6305	25.8185	19.5462	0.0256326
jgi|Nemve1|157632|estExt_gwp.C_10011	18.4263	25.296	22.5995	11.8776	15.6656	10.8503	0.0256355
jgi|Nemve1|216057|fgenesh1_pg.scaffold_247000026	3.8064	5.51075	5.45394	10.1125	6.87424	5.62438	0.0256872
jgi|Nemve1|218163|fgenesh1_pg.scaffold_333000008	3.30701	3.40876	2.64561	5.90174	5.85086	3.66315	0.0256938
jgi|Nemve1|210949|fgenesh1_pg.scaffold_130000002	5.18946	6.51226	6.207	2.23859	4.8842	4.32455	0.025705
jgi|Nemve1|87786|e_gw.17.69.1	14.0967	11.7002	7.04833	9.23331	16.7045	17.4799	0.0257395
jgi|Nemve1|191169|estExt_GenewiseH_1.C_1950090	4.36997	9.65621	10.7839	5.63866	10.0791	9.44476	0.0257566
jgi|Nemve1|136833|e_gw.384.11.1	6.31109	11.1571	6.64918	7.38172	6.64918	13.3547	0.0257576
jgi|Nemve1|239723|estExt_fgenesh1_pg.C_190001	13.1857	17.0174	19.1587	25.0753	33.4713	27.5547	0.0257618
jgi|Nemve1|169580|estExt_gwp.C_1290044	24.5302	49.4095	32.4741	37.9738	64.2499	38.6721	0.0257801
jgi|Nemve1|247948|estExt_fgenesh1_pg.C_3820010	22.2333	24.7262	26.6087	37.1402	16.128	15.2631	0.0257986
jgi|Nemve1|139747|e_gw.485.16.1	20.0625	15.8828	13.6885	7.83693	12.1211	9.6133	0.0258057
jgi|Nemve1|243705|estExt_fgenesh1_pg.C_960020	76.1336	87.534	85.5029	58.1158	46.6499	36.4943	0.0258096
jgi|Nemve1|203192|fgenesh1_pg.scaffold_41000031	8.18993	6.22435	6.09331	5.63467	13.0384	7.86234	0.025813
jgi|Nemve1|239513|estExt_fgenesh1_pg.C_160015	61.946	61.4997	52.0829	22.2702	64.4007	65.5164	0.0258273
jgi|Nemve1|116927|e_gw.142.109.1	16.6616	23.6936	22.3632	20.1459	39.3415	34.6535	0.0258491
jgi|Nemve1|99862|e_gw.54.74.1	2.74885	2.5374	1.2687	2.1145	1.40967	1.40967	0.0258614
jgi|Nemve1|26678|gw.103.95.1	224.344	118.955	128.145	182.991	109.328	98.2417	0.0258664
jgi|Nemve1|117533|e_gw.147.9.1	23.7552	30.1755	20.6092	19.9672	13.9321	11.8134	0.0258731
jgi|Nemve1|236177|estExt_fgenesh1_pm.C_5680002	9.52266	8.40621	18.4543	17.0751	16.5497	19.8334	0.0258907
jgi|Nemve1|247604|estExt_fgenesh1_pg.C_3220009	12.8963	14.0325	9.71484	23.6338	13.3508	10.8511	0.0258938
jgi|Nemve1|93849|e_gw.34.106.1	0.845235	0.845235	0.732537	0.281745	0.676188	0.732537	0.0259266
jgi|Nemve1|20036|gw.74.8.1	35.3184	20.794	15.6739	29.9893	40.961	34.169	0.0259528
jgi|Nemve1|239437|estExt_fgenesh1_pg.C_150009	115.965	95.0326	63.6711	49.8137	60.8267	60.1703	0.0259654
jgi|Nemve1|114899|e_gw.128.12.1	48.2314	33.3753	29.9157	16.7894	31.7473	25.4894	0.0259903
jgi|Nemve1|105113|e_gw.75.47.1	4.1797	4.49317	6.06056	2.08985	3.44825	3.55274	0.0259925
jgi|Nemve1|80020|e_gw.2.365.1	2.34402	2.97754	3.23095	6.08178	3.86447	4.05452	0.0259996
jgi|Nemve1|160841|estExt_gwp.C_160159	26.3039	28.9741	27.9515	9.65802	28.2923	25.1677	0.0260143
jgi|Nemve1|232305|fgsh_est.C_scaffold_36000003	20.2931	25.2843	28.8307	27.9112	47.4819	44.461	0.0260369
jgi|Nemve1|98605|e_gw.50.84.1	3.29509	6.7038	5.11307	5.11307	3.3519	2.8406	0.0260558
jgi|Nemve1|218147|fgenesh1_pg.scaffold_332000023	3.87474	4.4658	2.16723	1.77318	3.4807	3.74339	0.0260585
jgi|Nemve1|244542|estExt_fgenesh1_pg.C_1260009	26.4312	20.8631	27.2066	16.8455	17.8323	10.0086	0.0260677
jgi|Nemve1|110975|e_gw.103.37.1	44.7569	40.246	24.3872	18.96	31.3651	22.9776	0.0260686
jgi|Nemve1|241027|estExt_fgenesh1_pg.C_380079	3.40876	4.07016	1.72982	3.91753	5.03683	2.84911	0.0260747
jgi|Nemve1|185913|estExt_GenewiseH_1.C_770036	8.60322	11.0429	8.02539	18.1053	17.078	13.29	0.0260858
jgi|Nemve1|245773|estExt_fgenesh1_pg.C_1760009	33.9735	53.3464	51.3011	52.8919	92.2057	71.4694	0.0260873
jgi|Nemve1|245006|estExt_fgenesh1_pg.C_1420004	20.1982	24.6245	15.5175	8.6491	15.5175	14.1947	0.02609
jgi|Nemve1|132366|e_gw.308.7.1	12.1344	10.7219	9.11684	6.0993	7.76858	4.75103	0.0261167
jgi|Nemve1|223351|fgenesh1_pg.scaffold_2642000001	0.676188	1.40873	1.74682	1.18333	0.957933	0.901584	0.026119
jgi|Nemve1|167342|estExt_gwp.C_860192	782.493	622.227	578.803	547.205	335.928	324.949	0.0261223
jgi|Nemve1|191566|estExt_GenewiseH_1.C_2100078	95.408	150.144	87.6157	205.007	192.78	162.941	0.0261296
jgi|Nemve1|222647|fgenesh1_pg.scaffold_1806000002	1.46507	1.52142	1.12698	0.788886	1.35238	0.619839	0.0261387
jgi|Nemve1|80480|e_gw.3.276.1	12.2628	11.1713	9.43786	3.91639	10.2083	9.37365	0.0261703
jgi|Nemve1|49920|gw.11722.1.1	4.80665	4.70216	3.86622	1.98536	5.4336	5.95607	0.0261815
jgi|Nemve1|236562|estExt_fgenesh1_kg.C_250010	32.8941	37.7799	36.5869	46.9834	74.6508	62.7203	0.0262011
jgi|Nemve1|247133|estExt_fgenesh1_pg.C_2710017	31.647	46.3075	50.8889	73.937	41.1623	31.0831	0.0262099
jgi|Nemve1|114590|e_gw.126.81.1	0.393117	0.655195	0.393117	0.262078	0.655195	0.524156	0.0262134
jgi|Nemve1|207805|fgenesh1_pg.scaffold_84000061	27.0157	71.5331	68.7857	85.3208	73.6699	61.2559	0.026261
jgi|Nemve1|231938|fgsh_est.C_scaffold_10000012	11.2038	12.7108	12.2521	19.0662	9.04169	7.14162	0.026263
jgi|Nemve1|242047|estExt_fgenesh1_pg.C_550118	302.952	368.822	196.758	229.66	151.771	183.82	0.026263
jgi|Nemve1|246207|estExt_fgenesh1_pg.C_2030033	16.1963	13.4795	10.1358	24.8692	24.6602	17.5547	0.0262733
jgi|Nemve1|189804|estExt_GenewiseH_1.C_1510033	21.1908	17.8957	12.3282	9.14672	18.0662	24.4291	0.026274
jgi|Nemve1|167688|estExt_gwp.C_920008	21.2966	19.6192	12.2529	9.99192	20.3485	10.7942	0.0262911
jgi|Nemve1|237474|estExt_fgenesh1_kg.C_2700001	34.2667	26.0112	24.7664	17.6247	45.9947	39.3117	0.0262923
jgi|Nemve1|94668|e_gw.37.62.1	6.55495	7.75316	3.94707	10.7839	7.6122	5.28625	0.0263071
jgi|Nemve1|241515|estExt_fgenesh1_pg.C_460113	1.31347	1.77318	1.18212	0.656735	1.77318	1.11645	0.0263142
jgi|Nemve1|239514|estExt_fgenesh1_pg.C_160016	8.97628	12.0441	13.0667	5.56757	7.95367	6.30612	0.0263211
jgi|Nemve1|127783|e_gw.242.1.1	198.4	127.341	76.3783	124.977	123.663	89.1846	0.0263381
jgi|Nemve1|233333|fgsh_est.C_scaffold_188000004	28.69	25.054	31.0761	59.9366	46.5289	36.1324	0.0263691
jgi|Nemve1|164461|estExt_gwp.C_500218	156.402	128.632	103.469	49.5498	111.998	112.773	0.0263704
jgi|Nemve1|239725|estExt_fgenesh1_pg.C_190017	11.6694	8.82498	11.3777	15.1702	5.98057	7.1475	0.026378
jgi|Nemve1|131737|e_gw.299.68.1	4.37371	4.01667	4.86464	4.77538	2.72241	1.87445	0.0263883
jgi|Nemve1|229643|fgenesh1_pm.scaffold_92000002	166.679	133.863	284.957	334.878	208.871	197.468	0.0263916
jgi|Nemve1|248322|estExt_fgenesh1_pg.C_5040003	1655.35	1519.62	1517.18	2057.07	1051.07	735.703	0.0263964
jgi|Nemve1|105476|e_gw.77.94.1	0.802271	0.510536	0.58347	0.510536	0.802271	1.16694	0.0264013
jgi|Nemve1|200094|fgenesh1_pg.scaffold_19000086	9.05264	26.7727	15.9866	19.4535	15.9224	16.0508	0.0264018
jgi|Nemve1|94637|e_gw.37.185.1	28.663	18.0876	10.2837	14.9514	17.3582	16.1184	0.0264032
jgi|Nemve1|50028|gw.35.153.1	116.861	80.21	70.2719	49.4793	116.086	123.769	0.0264108
jgi|Nemve1|232919|fgsh_est.C_scaffold_100000002	7.43807	9.74838	6.59284	4.78967	5.46585	3.71904	0.0264194
jgi|Nemve1|200577|fgenesh1_pg.scaffold_22000099	3.17175	2.67837	2.88982	1.40967	4.01755	4.01755	0.0264289
jgi|Nemve1|245598|estExt_fgenesh1_pg.C_1680042	91.3464	91.8398	79.6461	52.2986	148.297	113.619	0.0264427
jgi|Nemve1|173611|estExt_gwp.C_2600043	13.7906	12.05	8.65816	7.85483	7.89946	5.22168	0.0264593
jgi|Nemve1|232294|fgsh_est.C_scaffold_35000007	13.3213	13.7442	11.2068	5.00431	14.59	9.65621	0.0264623
jgi|Nemve1|193399|estExt_GenewiseH_1.C_2930015	50.733	37.8935	26.3607	23.2361	33.5758	21.134	0.026469
jgi|Nemve1|192874|estExt_GenewiseH_1.C_2620046	32.7597	52.9397	60.8021	95.855	75.0198	66.3057	0.0264804
jgi|Nemve1|238225|estExt_fgenesh1_pg.C_40143	8.04591	7.94142	10.8672	9.50881	7.62794	3.44825	0.0264852
jgi|Nemve1|110912|e_gw.103.109.1	9.56488	6.10524	5.03683	4.27367	5.79998	3.91753	0.0264857
jgi|Nemve1|206740|fgenesh1_pg.scaffold_73000035	13.0034	16.7467	16.6154	16.6811	8.9316	7.09274	0.0264871
jgi|Nemve1|232862|fgsh_est.C_scaffold_91000004	2.94556	2.41	2.58852	4.64149	2.18686	1.87445	0.0264894
jgi|Nemve1|164776|estExt_gwp.C_530140	169.95	174.725	138.441	174.725	100.997	68.7298	0.0264938
jgi|Nemve1|83890|e_gw.8.279.1	31.2606	35.6607	22.1976	51.7507	56.4792	50.6999	0.0264968
jgi|Nemve1|166171|estExt_gwp.C_690256	265.747	234.429	188.237	115.052	273.413	336.901	0.0265012
jgi|Nemve1|205907|fgenesh1_pg.scaffold_64000030	14.6575	30.3376	16.2482	12.1577	22.0998	23.5201	0.0265049
jgi|Nemve1|237361|estExt_fgenesh1_kg.C_1970001	1292.45	1208.86	1122.94	690.595	573.029	696.728	0.026507
jgi|Nemve1|236613|estExt_fgenesh1_kg.C_300010	129.94	113.558	122.105	72.7033	59.8314	64.7665	0.0265106
jgi|Nemve1|179420|estExt_GenewiseH_1.C_120279	2.28067	3.35765	2.02726	1.52045	3.10424	1.52045	0.0265362
jgi|Nemve1|246999|estExt_fgenesh1_pg.C_2610017	20.2293	31.0483	38.3173	25.188	19.1587	15.3833	0.0265367
jgi|Nemve1|175313|estExt_gwp.C_3800007	4.67697	11.1008	9.52298	7.66347	12.7349	12.6222	0.0265398
jgi|Nemve1|190891|estExt_GenewiseH_1.C_1850047	259.968	307.588	345.434	336.374	140.851	177.626	0.0265439
jgi|Nemve1|131016|e_gw.289.33.1	50.5743	31.6612	17.5547	37.3038	29.2579	28.1085	0.0265485
jgi|Nemve1|161979|estExt_gwp.C_260124	4.23016	5.17829	7.00164	10.6483	6.2723	5.32416	0.026563
jgi|Nemve1|18826|gw.360.33.1	34.428	61.6977	40.5069	49.1991	30.7352	23.8042	0.02657
jgi|Nemve1|159278|estExt_gwp.C_70073	78.2302	77.444	69.7782	89.6962	50.1224	31.908	0.0265845
jgi|Nemve1|245850|estExt_fgenesh1_pg.C_1800024	25.1507	32.943	36.5541	44.6631	25.9109	15.9013	0.0265849
jgi|Nemve1|171940|estExt_gwp.C_1950051	215.475	300.588	226.574	114.994	142.38	175.939	0.0265879
jgi|Nemve1|248398|estExt_fgenesh1_pg.C_5430001	5.44826	4.30793	3.10424	1.83721	4.30793	4.43463	0.0265891
jgi|Nemve1|192627|estExt_GenewiseH_1.C_2520001	112.83	109.916	145.013	135.953	82.8643	51.8219	0.0265946
jgi|Nemve1|210706|fgenesh1_pg.scaffold_126000032	4.81363	5.03243	5.68883	3.13615	4.23016	2.04214	0.0266153
jgi|Nemve1|233380|fgsh_est.C_scaffold_202000006	35.5295	37.7119	41.291	44.8701	14.142	38.3229	0.0266182
jgi|Nemve1|184535|estExt_GenewiseH_1.C_580327	54.1332	51.8437	40.2946	22.8947	35.7666	26.049	0.0266248
jgi|Nemve1|244342|estExt_fgenesh1_pg.C_1180058	21.7089	32.1404	28.1228	42.7834	24.4577	15.6473	0.0266272
jgi|Nemve1|241706|estExt_fgenesh1_pg.C_500002	164.818	166.603	173.61	111.039	86.3585	78.5483	0.0266445
jgi|Nemve1|198568|fgenesh1_pg.scaffold_10000160	159.151	198.481	67.1001	184.173	175.362	128.068	0.0266491
jgi|Nemve1|88221|e_gw.17.21.1	54.0951	57.7014	29.9777	22.765	42.4308	36.6832	0.0266633
jgi|Nemve1|209275|fgenesh1_pg.scaffold_103000050	1.47543	1.62807	3.15438	2.64561	1.52631	2.79824	0.026664
jgi|Nemve1|103940|e_gw.70.22.1	2.4421	3.00174	2.49297	1.42456	3.66315	4.01929	0.0266649
jgi|Nemve1|235919|estExt_fgenesh1_pm.C_2810002	2.31131	2.63233	2.69653	2.0545	4.0448	4.75103	0.0266677
jgi|Nemve1|238609|estExt_fgenesh1_pg.C_70026	7.93682	8.80173	11.1421	19.0789	16.1789	14.0421	0.0266774
jgi|Nemve1|221732|fgenesh1_pg.scaffold_943000003	10.1263	16.6735	10.039	5.76154	11.6104	8.90419	0.0266982
jgi|Nemve1|229729|fgenesh1_pm.scaffold_99000006	36.5145	26.9261	18.7826	13.266	21.2782	21.7379	0.026706
jgi|Nemve1|179043|estExt_GenewiseH_1.C_100117	45.3939	74.2889	50.1079	40.2435	31.5139	31.3393	0.0267123
jgi|Nemve1|123505|e_gw.200.16.1	9.82308	13.8037	7.64017	4.75103	8.66742	7.89698	0.0267141
jgi|Nemve1|205911|fgenesh1_pg.scaffold_64000034	3.88808	10.3119	5.40951	6.81823	8.396	5.69125	0.0267531
jgi|Nemve1|192492|estExt_GenewiseH_1.C_2430074	38.6493	40.4791	21.4223	16.7808	40.256	36.2393	0.0267649
jgi|Nemve1|2076|gw.527.5.1	18.3157	31.1876	28.1859	13.1263	20.2491	15.1614	0.0267683
jgi|Nemve1|191954|estExt_GenewiseH_1.C_2220068	19.9941	24.948	28.3845	50.1192	43.1569	35.6145	0.0267867
jgi|Nemve1|85813|e_gw.12.296.1	5.17705	5.84649	4.37371	2.63315	2.72241	3.12408	0.0268158
jgi|Nemve1|34209|gw.22.72.1	14.1476	11.1128	12.5409	7.49779	7.45316	5.84649	0.0268325
jgi|Nemve1|239807|estExt_fgenesh1_pg.C_200047	4.74069	5.17829	6.41817	6.4911	10.5754	10.1378	0.0268341
jgi|Nemve1|216271|fgenesh1_pg.scaffold_255000015	1.81798	1.24986	2.15885	1.02261	0.90899	1.24986	0.0268451
jgi|Nemve1|244169|estExt_fgenesh1_pg.C_1120012	70.2109	77.1982	77.6489	91.7926	44.5721	35.2181	0.0268534
jgi|Nemve1|232050|fgsh_est.C_scaffold_17000004	46.0579	72.1216	37.846	36.8641	44.3173	26.51	0.0268553
jgi|Nemve1|216516|fgenesh1_pg.scaffold_263000001	4.44896	3.28202	6.63697	2.69855	3.64669	5.68883	0.0268594
jgi|Nemve1|238689|estExt_fgenesh1_pg.C_70187	8.11426	8.8468	9.41029	4.16983	4.50792	5.7476	0.02686
jgi|Nemve1|238978|estExt_fgenesh1_pg.C_100136	19.6416	16.9354	11.2612	8.03123	10.039	11.2612	0.0268611
jgi|Nemve1|192745|estExt_GenewiseH_1.C_2580004	108.164	140.935	160.572	274.647	152.428	134.237	0.0268627
jgi|Nemve1|239170|estExt_fgenesh1_pg.C_120148	73.9514	80.4227	64.4899	51.8597	135.585	92.4281	0.0268693
jgi|Nemve1|102199|e_gw.63.29.1	15.4087	24.975	17.2064	12.006	12.2628	10.0157	0.0268824
jgi|Nemve1|206172|fgenesh1_pg.scaffold_67000017	32.7747	24.4577	17.6913	46.9419	39.1887	26.5722	0.0268842
jgi|Nemve1|202580|fgenesh1_pg.scaffold_36000057	40.3341	53.2911	35.4229	39.2891	22.9883	21.212	0.0269279
jgi|Nemve1|240852|estExt_fgenesh1_pg.C_350083	35.1353	54.1806	33.4935	26.9918	65.8705	54.509	0.0269465
jgi|Nemve1|107738|e_gw.87.3.1	41.5394	64.5883	29.9187	25.296	45.1348	34.2845	0.0269797
jgi|Nemve1|170998|estExt_gwp.C_1640060	96.2394	161.971	113.794	51.4148	105.5	108.965	0.0270095
jgi|Nemve1|174851|estExt_gwp.C_3350036	8.91065	11.9245	9.23825	3.99669	11.2038	7.53474	0.0270185
jgi|Nemve1|242332|estExt_fgenesh1_pg.C_610090	15.1295	14.7278	15.5311	19.6371	31.3747	13.9245	0.0270307
jgi|Nemve1|165919|estExt_gwp.C_660144	18.5388	25.3007	20.6237	15.7777	16.5666	8.11426	0.0270327
jgi|Nemve1|108211|e_gw.89.103.1	15.3641	12.1341	9.77715	8.6423	8.38042	5.49965	0.027037
jgi|Nemve1|239716|estExt_fgenesh1_pg.C_180117	11.0783	9.65802	10.7374	16.4186	7.95367	5.90844	0.0270522
jgi|Nemve1|97669|e_gw.46.259.1	6.2277	6.2277	3.01755	4.36581	2.76073	3.98059	0.0270579
jgi|Nemve1|115977|e_gw.135.45.1	59.3684	64.0838	33.1782	29.2013	43.6315	31.5306	0.0270678
jgi|Nemve1|134716|e_gw.344.35.1	59.8676	80.647	59.8676	76.149	123.663	127.908	0.0270879
jgi|Nemve1|189422|estExt_GenewiseH_1.C_1420070	68.4583	94.9895	95.9553	38.5185	103.398	60.4479	0.0270905
jgi|Nemve1|217215|fgenesh1_pg.scaffold_288000029	0.87296	1.22214	0.960256	2.00781	1.92051	1.39674	0.0271015
jgi|Nemve1|163012|estExt_gwp.C_350292	8.44559	6.61401	7.17366	5.34209	6.81752	2.69648	0.0271085
jgi|Nemve1|215615|fgenesh1_pg.scaffold_232000029	13.7591	12.7108	13.2349	8.38649	14.4798	23.7836	0.0271207
jgi|Nemve1|183227|estExt_GenewiseH_1.C_450224	22.7887	20.2931	19.8334	7.15841	21.1469	18.0602	0.0271258
jgi|Nemve1|172911|estExt_gwp.C_2290046	215.534	233.866	188.821	80.1377	156.522	144.3	0.0271281
jgi|Nemve1|163153|estExt_gwp.C_370127	128.758	98.16	94.5537	203.082	191.418	199.306	0.0271472
jgi|Nemve1|82674|e_gw.6.358.1	12.7407	13.4631	8.86592	8.20919	20.4245	11.1645	0.0271647
jgi|Nemve1|183064|estExt_GenewiseH_1.C_440040	4.74069	6.4911	4.66776	2.62561	3.06322	3.28202	0.0271674
jgi|Nemve1|107116|e_gw.85.157.1	4.28419	4.0752	3.34376	8.35939	5.5381	4.38868	0.0271709
jgi|Nemve1|236739|estExt_fgenesh1_kg.C_460006	190.868	198.234	191.378	103.201	103.639	99.4816	0.0272001
jgi|Nemve1|235840|estExt_fgenesh1_pm.C_2520002	187.987	240.762	219.831	100.285	114.41	146.897	0.0272332
jgi|Nemve1|238446|estExt_fgenesh1_pg.C_50260	26.7999	17.6338	23.9191	34.4819	37.1881	47.5763	0.0272493
jgi|Nemve1|159727|estExt_gwp.C_90480	12.478	10.1794	8.53755	7.88082	19.308	13.8571	0.027257
jgi|Nemve1|248632|estExt_fgenesh1_pg.C_8360002	11.2693	25.0284	31.0562	18.8696	26.994	17.1661	0.0272641
jgi|Nemve1|203328|fgenesh1_pg.scaffold_42000043	46.3189	45.6991	24.7936	25.1317	23.4412	24.5118	0.0272676
jgi|Nemve1|183701|estExt_GenewiseH_1.C_500244	86.6945	83.3818	54.4131	29.8144	68.0164	60.2632	0.0272708
jgi|Nemve1|174745|estExt_gwp.C_3220027	91.7512	86.1837	63.4589	30.3944	84.9338	82.0932	0.0272763
jgi|Nemve1|140937|e_gw.553.19.1	15.0243	12.9093	7.51217	7.87684	11.3777	18.2334	0.0273001
jgi|Nemve1|238677|estExt_fgenesh1_pg.C_70161	11.8737	15.396	10.9079	9.65802	23.5769	17.6117	0.0273236
jgi|Nemve1|102865|e_gw.66.56.1	17.8084	12.5706	14.4911	10.9993	7.85664	7.15827	0.0273277
jgi|Nemve1|231585|fgenesh1_pm.scaffold_5298000001	1.47667	2.0545	1.54087	2.63233	3.08175	1.34827	0.0273286
jgi|Nemve1|236409|estExt_fgenesh1_kg.C_80009	158.904	136.534	131.35	97.9346	102.217	53.1371	0.0273532
jgi|Nemve1|111153|e_gw.104.51.1	17.2982	12.414	11.4473	5.90174	11.3456	8.75085	0.0273853
jgi|Nemve1|95047|e_gw.38.231.1	41.7489	35.287	28.7618	27.368	19.8291	15.838	0.0273895
jgi|Nemve1|201344|fgenesh1_pg.scaffold_27000107	23.7836	55.495	31.5149	45.7981	32.5632	24.8319	0.0273952
jgi|Nemve1|6877|gw.7736.4.1	0.397683	1.02261	0.568119	0.624931	0.624931	0.454495	0.0274104
jgi|Nemve1|222714|fgenesh1_pg.scaffold_1874000001	0.563866	0.704833	0.563866	0.4229	1.12773	0.704833	0.027435
jgi|Nemve1|173246|estExt_gwp.C_2420028	8.90419	13.0944	11.2612	6.72179	13.0944	18.6813	0.0274446
jgi|Nemve1|174995|estExt_gwp.C_3490036	3.59537	6.1635	7.64017	3.40276	4.62262	3.65958	0.0274498
jgi|Nemve1|234821|estExt_fgenesh1_pm.C_630017	1.30667	2.67016	2.32929	2.15885	3.92002	2.89741	0.0274707
jgi|Nemve1|222468|fgenesh1_pg.scaffold_1647000002	10.3398	14.8847	15.5665	14.3734	10.6806	5.39713	0.0274882
jgi|Nemve1|130991|e_gw.288.23.1	73.7651	51.6792	38.3229	33.4344	31.9503	37.1881	0.0274981
jgi|Nemve1|218637|fgenesh1_pg.scaffold_358000003	7.31447	4.91114	8.98634	5.22462	3.23926	5.32911	0.0275041
jgi|Nemve1|163041|estExt_gwp.C_360045	3.23095	3.2943	3.35765	7.09541	5.82838	5.1315	0.0275097
jgi|Nemve1|183467|estExt_GenewiseH_1.C_470243	8.90419	9.68986	7.76934	8.55501	17.11	15.3641	0.027514
jgi|Nemve1|220765|fgenesh1_pg.scaffold_576000001	1.90305	3.03078	1.6916	1.83257	3.10127	3.87658	0.0275214
jgi|Nemve1|174858|estExt_gwp.C_3380009	40.3196	42.1814	38.3293	28.6346	24.2688	15.7298	0.0275231
jgi|Nemve1|204335|fgenesh1_pg.scaffold_50000019	12.2521	8.84513	5.89675	11.3349	7.4037	5.045	0.0275414
jgi|Nemve1|244419|estExt_fgenesh1_pg.C_1210011	4.07016	8.1912	6.35963	2.95087	5.59647	4.83332	0.0275439
jgi|Nemve1|208175|fgenesh1_pg.scaffold_89000037	24.6754	25.9982	13.7368	20.1982	40.0911	24.9806	0.0275775
jgi|Nemve1|99151|e_gw.52.89.1	6.94506	5.3726	5.24156	10.8107	6.81403	4.12773	0.0275806
jgi|Nemve1|209146|fgenesh1_pg.scaffold_101000073	4.00078	5.7476	5.46585	2.42301	4.50792	7.21267	0.0275938
jgi|Nemve1|186304|estExt_GenewiseH_1.C_820054	8.63541	18.0094	17.0436	15.5096	22.5543	26.0199	0.0275989
jgi|Nemve1|114137|e_gw.123.41.1	11.2852	11.2852	4.80665	5.32911	8.15041	8.67287	0.0276109
jgi|Nemve1|244614|estExt_fgenesh1_pg.C_1280020	63.9561	57.5323	41.98	26.2586	31.0483	36.9086	0.0276123
jgi|Nemve1|217910|fgenesh1_pg.scaffold_318000002	31.9503	27.3236	19.7289	25.7523	52.6395	30.4663	0.0276175
jgi|Nemve1|128421|e_gw.250.1.1	2.8406	2.27248	1.70436	1.24986	1.24986	1.47711	0.0276363
jgi|Nemve1|204086|fgenesh1_pg.scaffold_48000006	0.511307	0.624931	1.02261	0.852179	1.13624	0.511307	0.0276488
jgi|Nemve1|107308|e_gw.86.238.1	14.6597	10.1378	8.89791	12.2529	22.4636	16.9936	0.0276684
jgi|Nemve1|205803|fgenesh1_pg.scaffold_63000016	56.2157	69.5162	50.6466	49.0086	31.4493	26.3388	0.0276799
jgi|Nemve1|90769|e_gw.25.65.1	18.9676	21.0206	14.8617	7.49779	14.951	11.1574	0.027683
jgi|Nemve1|98402|e_gw.49.3.1	17.2717	18.5213	6.96223	13.0319	21.6454	16.6915	0.0276857
jgi|Nemve1|236608|estExt_fgenesh1_kg.C_300005	56.2781	53.2432	52.9308	81.7616	106.353	110.191	0.0276918
jgi|Nemve1|248641|estExt_fgenesh1_pg.C_8590002	14.3155	15.6739	10.0313	8.77736	17.5547	22.7793	0.0276919
jgi|Nemve1|105520|e_gw.77.31.1	663.318	763.526	469.171	290.28	394.877	453.706	0.0277039
jgi|Nemve1|190658|estExt_GenewiseH_1.C_1760087	38.5185	37.3254	71.6398	47.1539	39.5979	25.7926	0.0277142
jgi|Nemve1|240729|estExt_fgenesh1_pg.C_330083	31.2946	23.33	22.9071	11.4183	14.59	19.8058	0.0277178
jgi|Nemve1|235862|estExt_fgenesh1_pm.C_2600002	225.181	201.252	272.516	468.857	328.211	208.671	0.0277341
jgi|Nemve1|216953|fgenesh1_pg.scaffold_278000036	7.44756	9.18105	6.99814	14.5099	15.6014	14.0605	0.027742
jgi|Nemve1|90486|e_gw.24.142.1	19.3223	17.3584	16.2181	10.1363	9.50279	8.55251	0.0277474
jgi|Nemve1|174242|estExt_gwp.C_2940076	9.10721	11.0728	14.0867	18.0179	8.38649	7.46922	0.0277474
jgi|Nemve1|161560|estExt_gwp.C_220207	250.676	251.07	223.224	94.4385	193.737	302.886	0.0277551
jgi|Nemve1|210909|fgenesh1_pg.scaffold_129000035	1.21986	1.66928	2.63233	1.79769	2.95334	3.01755	0.0277947
jgi|Nemve1|241821|estExt_fgenesh1_pg.C_520034	15.7133	7.59475	6.19802	9.16608	7.59475	8.99149	0.0277992
jgi|Nemve1|194445|estExt_GenewiseH_1.C_3760012	1257.25	1713.73	2542.94	2367.42	1243.04	1188.39	0.0278435
jgi|Nemve1|99635|e_gw.53.10.1	47.3506	41.834	35.7921	14.7765	41.0459	32.4427	0.0278572
jgi|Nemve1|79631|e_gw.2.343.1	10.8754	6.81823	7.49442	8.5087	4.00078	5.07141	0.0278723
jgi|Nemve1|99492|e_gw.53.42.1	8.02271	13.201	10.0649	4.08429	10.0649	8.97085	0.0278969
jgi|Nemve1|160797|estExt_gwp.C_160049	13.7442	21.6384	15.4358	28.7572	34.6073	26.1493	0.0278977
jgi|Nemve1|89181|e_gw.20.183.1	1.67748	2.91735	3.06322	3.93842	5.10536	3.28202	0.027902
jgi|Nemve1|247690|estExt_fgenesh1_pg.C_3380010	23.6984	37.3104	27.2688	38.2923	57.3045	54.359	0.0279104
jgi|Nemve1|162648|estExt_gwp.C_320239	56.1313	54.6473	47.4017	38.0611	94.2797	84.066	0.0279169
jgi|Nemve1|92832|e_gw.31.181.1	45.7431	38.934	32.8233	34.9184	20.7764	17.6338	0.0279225
jgi|Nemve1|243516|estExt_fgenesh1_pg.C_910012	30.9028	45.5685	42.164	62.1547	28.1966	25.4031	0.0279368
jgi|Nemve1|197733|fgenesh1_pg.scaffold_7000016	82.0265	71.4728	89.55	163.217	83.5939	71.8908	0.0279371
jgi|Nemve1|166469|estExt_gwp.C_740138	12.107	15.3161	11.6694	27.0584	17.0665	23.5576	0.0279413
jgi|Nemve1|232450|fgsh_est.C_scaffold_47000011	7.37717	5.85086	5.0877	12.7193	8.75085	6.35963	0.0279429
jgi|Nemve1|189424|estExt_GenewiseH_1.C_1420085	4.32455	6.66489	9.71751	7.73331	11.3456	11.8035	0.027969
jgi|Nemve1|235005|estExt_fgenesh1_pm.C_810002	282.181	272.407	162.642	170.3	144.263	122.675	0.0279749
jgi|Nemve1|222966|fgenesh1_pg.scaffold_2110000002	7.92786	20.6386	17.1006	20.9662	13.8901	11.5314	0.0279765
jgi|Nemve1|162356|estExt_gwp.C_300223	35.6145	43.4247	20.0834	20.3958	21.7793	22.6273	0.0279814
jgi|Nemve1|237815|estExt_fgenesh1_pg.C_10276	41.3591	46.813	32.9509	39.257	24.3723	16.8731	0.0279863
jgi|Nemve1|85971|e_gw.12.226.1	1.93333	3.00174	2.69648	4.17192	5.34209	3.40876	0.0279869
jgi|Nemve1|246807|estExt_fgenesh1_pg.C_2430025	22.8214	22.4833	27.3856	8.7341	22.0325	28.0618	0.0279886
jgi|Nemve1|168930|estExt_gwp.C_1170015	5.76502	3.80111	4.56134	6.52525	7.60223	10.0096	0.0279969
jgi|Nemve1|236593|estExt_fgenesh1_kg.C_280002	49.846	69.313	43.1242	36.4897	35.3549	24.9667	0.0280009
[truncated: 21,041 more rows]
